# Supplementary material for: A nickel-catalyzed silylation reaction of alkyl aryl sulfoxides with silylzinc reagents
Source: Royal Society of Chemistry journal article supplement (doi:10.1039/d1ob00840d), 2021-01-01

Electronic supplementary information

## **A nickel-catalyzed silylation reaction of alkyl aryl sulfoxides with silylzinc reagents**

Wei-Ze Li and Zhong-Xia Wang

<sup>a</sup> CAS Key Laboratory of Soft Matter Chemistry and Department of Chemistry, University of Science and Technology of China, Hefei, Anhui 230026, P. R. China.

E-mail: zxwang@ustc.edu.cn; Tel: +86 551 63603043

<sup>b</sup> Collaborative Innovation Center of Chemical Science and Engineering, Tianjin 300072, P. R. China

### Table of Contents

|   |                                                                           |        |
|---|---------------------------------------------------------------------------|--------|
| 1 | General information                                                       | S2     |
| 2 | General procedure for the nickel-catalyzed silylations of aryl sulfoxides | S2     |
| 3 | Mechanistic studies                                                       | S2     |
| 4 | Characterization data for the silylation products                         | S4-11  |
|   | References                                                                | S11    |
| 5 | Copies of NMR spectra of the silylation products                          | S12-43 |

## 1. General information

All reactions were performed under nitrogen atmosphere using standard Schlenk and vacuum line techniques. Tetrahydrofuran was purified by JC Meyer Phoenix Solvent Systems. 1,4-Dioxane were distilled over sodium and degassed prior to use. Dimethyl sulfoxide (DMSO) was dried over CaH<sub>2</sub>, fractionally distilled under reduced pressure and degassed prior to use. Dichloromethane (DCM) was distilled over CaH<sub>2</sub> and degassed prior to use. CPME (extra dry) was purchased from Energy Chemical and degassed prior to use. ZnCl<sub>2</sub> were purchased from commercial vendors and dried under vacuum at 140 °C for 12 h prior to use. Other chemicals were obtained from commercial vendors and used as received. Silylzinc reagents were prepared according to reported procedure.<sup>1</sup> The concentration of the silylzinc solution was titrated using Knochel's method.<sup>2</sup> Aryl sulfoxides were synthesized according to the literature procedures.<sup>3-6</sup> NMR spectra were recorded on a Bruker AV400 spectrometer at 25 °C. The chemical shifts of the <sup>1</sup>H NMR spectra were referenced to TMS and the chemical shifts of the <sup>13</sup>C NMR spectra were referenced to internal solvent resonances. High-resolution mass spectra (HR-MS) were acquired on a Thermo Fisher LTQ Orbitrap XL mass spectrometer.

## 2. General procedure for the nickel-catalyzed silylations of aryl sulfoxides

NiBr<sub>2</sub>(PEt<sub>3</sub>)<sub>2</sub> (4.5 mg, 5 mol %), sulfoxides (0.2 mmol) and THF (1.5 cm<sup>3</sup>) were charged to a Schlenk tube under nitrogen. Then, a solution of silicon zinc reagent (1.5 cm<sup>3</sup>, 0.4 M solution in THF, 0.6 mmol) was added. The resultant mixture was stirred at 80 °C for 12 h and then cooled to room temperature. A 10% aqueous solution of NH<sub>4</sub>Cl (10 cm<sup>3</sup>) was added. The resultant mixture was diluted with EtOAc (3 × 5 cm<sup>3</sup>). The combined organic phases were dried over anhydrous Na<sub>2</sub>SO<sub>4</sub>, concentrated by rotary evaporation, and purified by column chromatography (silica gel).

## 3. Mechanistic studies

### (1) Effect of 1,1-diphenylethene additive

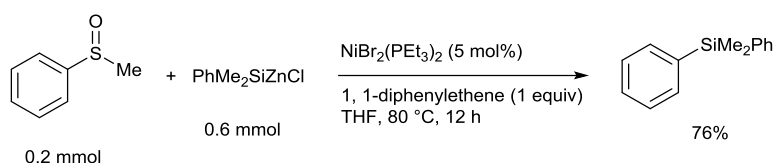

NiBr<sub>2</sub>(PEt<sub>3</sub>)<sub>2</sub> (4.5 mg, 5 mol %), PhS(O)Me (28 mg, 0.2 mmol) and THF (1.5 cm<sup>3</sup>) were charged to a Schlenk tube under nitrogen. Then PhMe<sub>2</sub>SiZnCl solution (1.5 cm<sup>3</sup>, 0.4 M solution in THF, 0.6 mmol) and 1,1-diphenylethene (36 mg, 0.2 mmol) were successively

added to the Schlenk tube. The mixture was stirred at 80 °C for 12 h and then cooled to room temperature. A 10% aqueous solution of NH<sub>4</sub>Cl (10 cm<sup>3</sup>) was added. The resultant mixture was extracted with EtOAc (5 cm<sup>3</sup> × 3). The combined organic phases were dried over anhydrous Na<sub>2</sub>SO<sub>4</sub> and concentrated by rotary evaporation. The residue was dissolved in CDCl<sub>3</sub> and its <sup>1</sup>H NMR spectrum was determined. The yield was obtained on the basis of the <sup>1</sup>H NMR spectrum using C<sub>2</sub>H<sub>2</sub>Cl<sub>4</sub> as an internal standard.

## (2) Methanesulfenate anion trap experiment

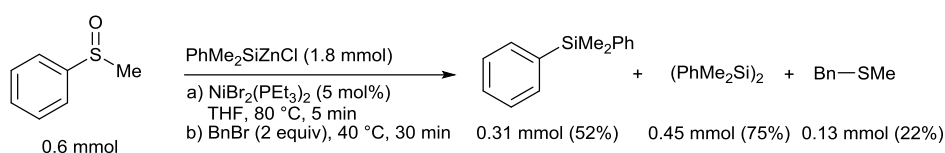

Ni(PEt<sub>3</sub>)<sub>2</sub>Br<sub>2</sub> (13.5 mg, 5 mol%), PhS(O)Me (84.1 mg, 0.6 mmol) and THF (1.5 cm<sup>3</sup>) were successively charged to a Schlenk tube under nitrogen. To the stirred mixture a solution of PhMe<sub>2</sub>SiZnCl (4.5 cm<sup>3</sup>, 0.4 M solution in THF, 1.8 mmol) was added at room temperature. The mixture was stirred at 80 °C for 5 min. and then cooled to room temperature. Benzyl bromide (205 mg, 1.2 mmol) was added. The resulting mixture was stirred at 40 °C for 30 min. Saturated aqueous solution of NH<sub>4</sub>Cl (10 cm<sup>3</sup>) was added and the mixture was extracted with EtOAc (10 cm<sup>3</sup> × 3). The combined organic layers were dried over anhydrous Na<sub>2</sub>SO<sub>4</sub> and concentrated under reduced pressure. The residue was dissolved in CDCl<sub>3</sub> and its <sup>1</sup>H NMR spectrum was determined. The yields were obtained on the basis of the <sup>1</sup>H NMR spectrum using C<sub>2</sub>H<sub>2</sub>Cl<sub>4</sub> as an internal standard.

## (3) Intermolecular competition experiment

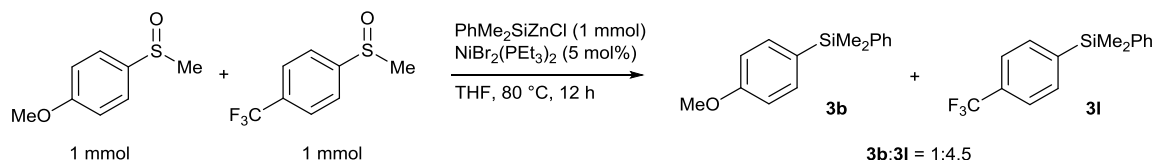

NiBr<sub>2</sub>(PEt<sub>3</sub>)<sub>2</sub> (22.5 mg, 5 mol %), *p*-MeOC<sub>6</sub>H<sub>4</sub>S(O)Me (170.2 mg, 1 mmol), *p*-CF<sub>3</sub>C<sub>6</sub>H<sub>4</sub>-S(O)Me (208.2 mg, 1 mmol), and THF (1.5 cm<sup>3</sup>) were charged to a Schlenk tube under nitrogen. A solution of PhMe<sub>2</sub>SiZnCl (2.5 cm<sup>3</sup>, 0.4 M solution in THF, 1 mmol) was added. The mixture was stirred at 80 °C for 12 h and then cooled to room temperature. A 10% aqueous solution of NH<sub>4</sub>Cl (10 cm<sup>3</sup>) was added. The resultant mixture was extracted with EtOAc (10 cm<sup>3</sup> × 3). The combined organic phases were dried over anhydrous Na<sub>2</sub>SO<sub>4</sub>,

concentrated by rotary evaporation, and purified by column chromatography (silica gel) to give a mixture of **3b** and **3l**. The ratio of **3b** and **3l** was determined by <sup>1</sup>H NMR spectrum of the mixture.

(4) Methanesulfenate anion trap experiment in the presence of 1,1-diphenylethene

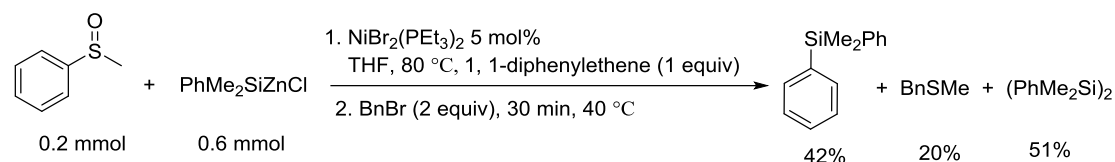

NiBr<sub>2</sub>(PEt<sub>3</sub>)<sub>2</sub> (4.5 mg, 5 mol %), PhS(O)Me (28 mg, 0.2 mmol) and THF (1.5 cm<sup>3</sup>) were charged to a Schlenk tube under nitrogen. A solution of PhMe<sub>2</sub>SiZnCl (1.5 cm<sup>3</sup>, 0.4 M solution in THF, 0.6 mmol) and 1,1-diphenylethene (36 mg, 0.2 mmol) were successively added. The mixture was stirred at 80 °C for 5 min. and then cooled to room temperature. Benzyl bromide (68.4 mg, 0.4 mmol) was added, and the resulting mixture was stirred at 40 °C for 30 min. The reaction mixture was added saturated aqueous solution of NH<sub>4</sub>Cl (10 cm<sup>3</sup>) and then extracted with EtOAc (10 cm<sup>3</sup> × 3). The combined organic layers were dried over anhydrous Na<sub>2</sub>SO<sub>4</sub> and concentrated under reduced pressure. The residue was dissolved in CDCl<sub>3</sub> and its <sup>1</sup>H NMR spectrum was determined. The yields were obtained on the basis of the <sup>1</sup>H NMR spectrum using C<sub>2</sub>H<sub>2</sub>Cl<sub>4</sub> as an internal standard.

#### 4. Characterization data for the silylation products

Pure **3a** cannot be obtained in this transformation. A mixture of **3a** and (PhMe<sub>2</sub>Si)<sub>2</sub> was obtained.

1. (4-methoxyphenyl)dimethyl(phenyl)silane (**3b**).<sup>7</sup>

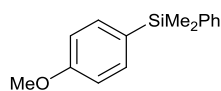

Colorless oil (33 mg, 68%). <sup>1</sup>H NMR (500 MHz, CDCl<sub>3</sub>): δ 7.52–7.47 (m, 2H), 7.43 (d, *J* = 8.5 Hz, 2H), 7.36–7.29 (m, 3H), 6.89 (d, *J* = 8.5 Hz, 2H), 3.78 (s, 3H), 0.51 (s, 6H). <sup>13</sup>C NMR (126 MHz, CDCl<sub>3</sub>): δ 160.6, 138.8, 135.8, 134.3, 129.1, 127.9, 113.7, 55.2, –2.1.

2. dimethyl(4-phenoxyphenyl)(phenyl)silane (**3c**).<sup>7</sup>

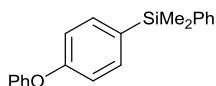

Colorless oil (43 mg, 70%).  $^1\text{H}$  NMR (400 MHz,  $\text{CDCl}_3$ ):  $\delta$  7.56–7.50 (m, 2H), 7.47 (d,  $J = 8.5$  Hz, 2H), 7.39–7.29 (m, 5H), 7.11 (t,  $J = 7.4$  Hz, 1H), 7.06–7.00 (m, 2H), 6.98 (d,  $J = 8.5$  Hz, 2H), 0.54 (s, 6H).  $^{13}\text{C}$  NMR (101 MHz,  $\text{CDCl}_3$ ):  $\delta$  158.6, 156.8, 138.5, 135.9, 134.3, 132.2, 129.9, 129.3, 128.0, 123.7, 119.5, 118.1, –2.1.

3. benzo[*d*][1,3]dioxol-5-yl(dimethyl(phenyl)silyl)silane (**3d**).<sup>7</sup>

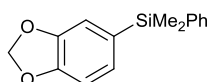

Colorless oil (24 mg, 47%).  $^1\text{H}$  NMR (400 MHz,  $\text{CDCl}_3$ ):  $\delta$  7.54–7.48 (m, 2H), 7.38–7.32 (m, 3H), 7.00 (dd,  $J = 7.6, 1.0$  Hz, 1H), 6.95 (s, 1H), 6.84 (d,  $J = 7.6$  Hz, 1H), 5.93 (s, 2H), 0.52 (s, 6H).  $^{13}\text{C}$  NMR (101 MHz,  $\text{CDCl}_3$ ):  $\delta$  148.6, 147.5, 138.4, 134.2, 131.4, 129.3, 128.4, 128.0, 113.6, 108.7, 100.7, –2.1.

4. N-(4-(dimethyl(phenyl)silyl)phenyl)acetamide (**3e**).<sup>8</sup>

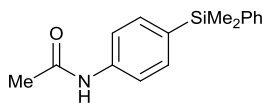

White solid (39 mg, 73%).  $^1\text{H}$  NMR (500 MHz,  $\text{CDCl}_3$ ):  $\delta$  7.55 (b, 1H), 7.52–7.43 (m, 4H), 7.46 (d,  $J = 8.3$  Hz, 2H), 7.38–7.30 (m, 3H), 2.15 (s, 3H), 0.52 (s, 6H).  $^{13}\text{C}$  NMR (126 MHz,  $\text{CDCl}_3$ ):  $\delta$  168.7, 138.8, 138.3, 135.1, 134.2, 133.8, 129.2, 127.9, 119.3, 24.7, –2.2.

5. N-(4-(dimethyl(phenyl)silyl)phenyl)-*N*-methylacetamide (**3f**).<sup>8</sup>

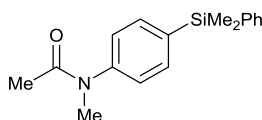

White solid (42 mg, 74%).  $^1\text{H}$  NMR (500 MHz,  $\text{CDCl}_3$ ):  $\delta$  7.58–7.51 (m, 4H), 7.42–7.35 (m, 3H), 7.16 (d,  $J = 7.9$  Hz, 2H), 3.26 (s, 3H), 1.88 (s, 3H), 0.57 (s, 6H).  $^{13}\text{C}$  NMR (126 MHz,  $\text{CDCl}_3$ ):  $\delta$  170.7, 145.3, 138.4, 137.7, 135.7, 134.2, 129.5, 128.1, 126.5, 37.2, 22.6, –2.3.

6. [1,1'-biphenyl]-4-yl(dimethyl(phenyl)silyl)silane (**3g**).<sup>7</sup>

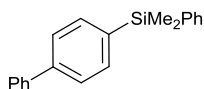

White solid (41 mg, 71%).  $^1\text{H}$  NMR (400 MHz,  $\text{CDCl}_3$ ):  $\delta$  7.64–7.52 (m, 8H), 7.44 (t,  $J = 7.5$  Hz, 2H), 7.40–7.31 (m, 4H), 0.58 (s, 6H).  $^{13}\text{C}$  NMR (101 MHz,  $\text{CDCl}_3$ ):  $\delta$  142.0, 141.2, 138.3, 137.1, 134.8, 134.3, 129.3, 128.9, 128.0, 127.5, 127.3, 126.7, -2.2.

7. [1,1'-biphenyl]-3-yl dimethyl(phenyl)silane (**3h**).<sup>8</sup>

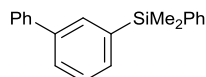

Colorless oil (43 mg, 75%).  $^1\text{H}$  NMR (400 MHz,  $\text{CDCl}_3$ ):  $\delta$  7.74 (s, 1H), 7.60–7.52 (m, 5H), 7.50 (dt,  $J = 7.3, 1.2$  Hz, 1H), 7.45–7.38 (m, 3H), 7.37–7.31 (m, 4H), 0.59 (s, 6H).  $^{13}\text{C}$  NMR (126 MHz,  $\text{CDCl}_3$ ):  $\delta$  141.6, 140.7, 138.9, 138.2, 134.3, 133.3, 133.1, 129.3, 128.9, 128.4, 128.2, 128.0, 127.4, 127.3, -2.2.

8. (4'-fluoro-[1,1'-biphenyl]-4-yl) dimethyl(phenyl)silane (**3i**).<sup>8</sup>

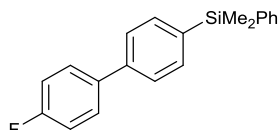

White solid (49 mg, 80%).  $^1\text{H}$  NMR (500 MHz,  $\text{CDCl}_3$ ):  $\delta$  7.64–7.47 (m, 8H), 7.42–7.32 (m, 3H), 7.12 (t,  $J = 8.7$  Hz, 2H), 0.58 (s, 6H).  $^{13}\text{C}$  NMR (101 MHz,  $\text{CDCl}_3$ ):  $\delta$  162.7 (d,  $J = 247.4$  Hz), 141.0, 138.2, 137.3, 137.24, 137.19, 134.6 (d,  $J = 56.5$  Hz), 129.3, 128.8 (d,  $J = 8.1$  Hz), 128.0, 126.5, 115.8 (d,  $J = 21.5$  Hz), -2.2.  $^{19}\text{F}$  NMR (471 MHz,  $\text{CDCl}_3$ ):  $\delta$  -115.56.

9. dimethyl(naphthalen-2-yl)(phenyl)silane (**3j**).<sup>7</sup>

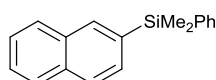

Colorless oil (34 mg, 64%).  $^1\text{H}$  NMR (400 MHz,  $\text{CDCl}_3$ ):  $\delta$  8.02 (s, 1H), 7.85–7.78 (m, 3H), 7.61–7.52 (m, 3H), 7.51–7.44 (m, 2H), 7.40–7.32 (m, 3H), 0.63 (s, 6H).  $^{13}\text{C}$  NMR (101 MHz,  $\text{CDCl}_3$ ):  $\delta$  138.4, 135.8, 135.0, 134.4, 133.8, 133.0, 130.5, 129.3, 128.2, 128.0, 127.8, 127.2, 126.6, 126.1, -2.2.

10. dimethyl(naphthalen-1-yl)(phenyl)silane (**3k**).<sup>7</sup>

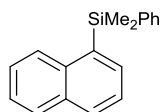

Colorless oil (27 mg, 51%).  $^1\text{H}$  NMR (500 MHz,  $\text{CDCl}_3$ ):  $\delta$  7.92 (d,  $J = 8.5$  Hz, 1H), 7.89 (d,  $J = 8.2$  Hz, 1H), 7.85 (d,  $J = 8.1$  Hz, 1H), 7.73 (dd,  $J = 6.8, 1.1$  Hz, 1H), 7.56–7.52 (m, 2H),

7.49–7.45 (m, 1H), 7.45–7.41 (m, 1H), 7.38–7.30 (m, 4H), 0.70 (s, 6H).  $^{13}\text{C}$  NMR (126 MHz,  $\text{CDCl}_3$ ):  $\delta$  139.0, 137.1, 135.9, 134.8, 134.3, 133.6, 130.4, 129.2, 129.1, 128.8, 128.0, 125.8, 125.5, 125.2, –0.8.

11. dimethyl(phenyl)(4-(trifluoromethyl)phenyl)silane (**3l**).<sup>9</sup>

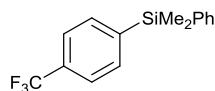

Colorless oil (50 mg, 89%).  $^1\text{H}$  NMR (400 MHz,  $\text{CDCl}_3$ ):  $\delta$  7.63 (d,  $J = 8.1$  Hz, 2H), 7.58 (d,  $J = 8.1$  Hz, 2H), 7.54–7.47 (m, 2H), 7.42–7.33 (m, 3H), 0.58 (s, 6H).  $^{13}\text{C}$  NMR (101 MHz,  $\text{CDCl}_3$ ):  $\delta$  143.5, 137.2, 134.6, 134.3, 131.2 (q,  $J = 32.3$  Hz), 129.6, 128.1, 124.5 (q,  $J = 3.8$  Hz), 124.4 (d,  $J = 273.2$  Hz), –2.5.  $^{19}\text{F}$  NMR (376 MHz,  $\text{CDCl}_3$ ):  $\delta$  –62.90.

12. (4-(dimethyl(phenyl)silyl)phenyl)(phenyl)methanone (**3m**).<sup>8</sup>

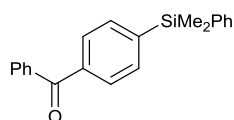

Colorless oil (52 mg, 82%).  $^1\text{H}$  NMR (400 MHz,  $\text{CDCl}_3$ ):  $\delta$  7.84–7.79 (m, 2H), 7.75 (d,  $J = 8.0$  Hz, 2H), 7.63 (d,  $J = 8.1$  Hz, 2H), 7.61–7.51 (m, 3H), 7.47 (t,  $J = 7.6$  Hz, 2H), 7.42–7.33 (m, 3H), 0.60 (s, 6H).  $^{13}\text{C}$  NMR (126 MHz,  $\text{CDCl}_3$ ):  $\delta$  197.0, 144.2, 138.1, 137.6, 137.4, 134.3, 134.2, 132.6, 130.2, 129.5, 129.2, 128.4, 128.1, –2.4.

13. 1-(4-(dimethyl(phenyl)silyl)phenyl)ethan-1-one (**3n**).<sup>8</sup>

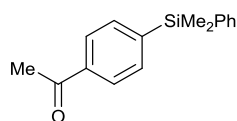

Colorless oil (37 mg, 73%).  $^1\text{H}$  NMR (500 MHz,  $\text{CDCl}_3$ ):  $\delta$  7.91 (d,  $J = 8.1$  Hz, 2H), 7.62 (d,  $J = 8.1$  Hz, 2H), 7.51 (dd,  $J = 7.6, 1.7$  Hz, 2H), 7.42–7.33 (m, 3H), 2.60 (s, 3H), 0.58 (s, 6H).  $^{13}\text{C}$  NMR (126 MHz,  $\text{CDCl}_3$ ):  $\delta$  198.6, 145.2, 137.5, 137.4, 134.5, 134.3, 129.5, 128.1, 127.4, 26.8, –2.5.

14. methyl 4-(dimethyl(phenyl)silyl)benzoate (**3o**).<sup>8</sup>

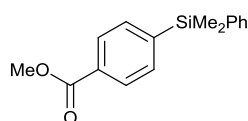

Colorless oil (45 mg, 84%).  $^1\text{H}$  NMR (400 MHz,  $\text{CDCl}_3$ ):  $\delta$  7.99 (d,  $J = 8.0$  Hz, 2H), 7.59 (d,  $J = 8.0$  Hz, 2H), 7.54–7.46 (d,  $J = 6.0$  Hz, 2H), 7.42–7.31 (m, 3H), 3.91 (s, 3H), 0.57 (s, 6H).  $^{13}\text{C}$  NMR (101 MHz,  $\text{CDCl}_3$ ):  $\delta$  167.4, 144.7, 137.5, 134.3, 130.7, 129.5, 128.7, 128.1, 52.3, –2.4.

15. isopropyl 4-(dimethyl(phenyl)silyl)benzoate (**3p**).<sup>8</sup>

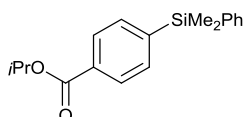

White solid (45 mg, 76%).  $^1\text{H}$  NMR (500 MHz,  $\text{CDCl}_3$ ):  $\delta$  7.99 (d,  $J = 7.8$  Hz, 2H), 7.59 (d,  $J = 7.8$  Hz, 2H), 7.50 (d,  $J = 6.5$  Hz, 2H), 7.40–7.31 (m, 3H), 5.30–5.20 (m, 1H), 1.36 (d,  $J = 6.2$  Hz, 6H), 0.57 (s, 6H).  $^{13}\text{C}$  NMR (126 MHz,  $\text{CDCl}_3$ ):  $\delta$  166.4, 144.5, 137.5, 134.3, 134.2, 131.5, 129.5, 128.6, 128.1, 68.5, 22.1, –2.4.

16. methyl 2-(dimethyl(phenyl)silyl)benzoate (**3q**).

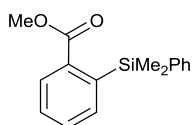

Colorless oil (43 mg, 80%).  $^1\text{H}$  NMR (500 MHz,  $\text{CDCl}_3$ ):  $\delta$  7.99 (dd,  $J = 7.3, 1.5$  Hz, 1H), 7.62–7.57 (m, 1H), 7.52–7.42 (m, 4H), 7.35–7.29 (m, 3H), 3.62 (s, 3H), 0.59 (s, 6H).  $^{13}\text{C}$  NMR (126 MHz,  $\text{CDCl}_3$ ):  $\delta$  168.7, 140.1, 139.9, 136.9, 136.4, 133.8, 131.5, 130.2, 129.3, 128.7, 127.8, 51.9, –0.8. HR-MS (EI):  $m/z$  270.1071 [ $\text{M}$ ]<sup>+</sup>, calcd for  $\text{C}_{16}\text{H}_{18}\text{O}_2\text{Si}$  270.1065.

17. 4-(dimethyl(phenyl)silyl)-*N,N*-diethylbenzamide (**3r**).<sup>8</sup>

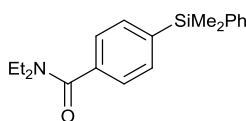

Colorless oil (40 mg, 65%).  $^1\text{H}$  NMR (400 MHz,  $\text{CDCl}_3$ ):  $\delta$  7.56–7.48 (m, 4H), 7.40–7.30 (m, 5H), 3.54 (b, 2H), 3.25 (b, 2H), 1.24 (b, 3H), 1.11 (b, 3H), 0.56 (s, 6H).  $^{13}\text{C}$  NMR (101 MHz,  $\text{CDCl}_3$ ):  $\delta$  171.4, 139.7, 137.9, 137.8, 134.3, 134.3, 129.4, 128.0, 125.6, 43.3, 39.3, 14.4, 13.0, –2.4.

18. 2-(dimethyl(phenyl)silyl)pyridine (**3s**).<sup>8</sup>

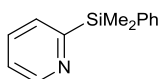



Colorless oil (37 mg, 88%).  $^1\text{H}$  NMR (500 MHz,  $\text{CDCl}_3$ ):  $\delta$  8.80 (d,  $J = 4.6$  Hz, 1H), 7.63–7.57 (m, 2H), 7.54 (dt,  $J = 7.6, 1.2$  Hz, 1H), 7.43 (d,  $J = 7.6$  Hz, 1H), 7.40–7.33 (m, 3H), 7.22–7.15 (m, 1H), 0.62 (s, 6H).  $^{13}\text{C}$  NMR (126 MHz,  $\text{CDCl}_3$ ):  $\delta$  166.7, 150.4, 137.4, 134.4, 134.1, 129.9, 129.4, 128.0, 123.0, –3.0.

19. 2-(dimethyl(phenyl)silyl)-4-(trifluoromethyl)pyridine (**3t**).

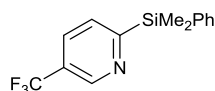

Colorless oil (52 mg, 93%).  $^1\text{H}$  NMR (400 MHz,  $\text{CDCl}_3$ ):  $\delta$  9.04 (s, 1H), 7.76 (dd,  $J = 7.9, 1.7$  Hz, 1H), 7.62–7.57 (m, 2H), 7.55 (d,  $J = 7.9$  Hz, 1H), 7.42–7.35 (m, 3H), 0.64 (s, 6H).  $^{13}\text{C}$  NMR (126 MHz,  $\text{CDCl}_3$ ):  $\delta$  172.1, 146.7 (q,  $J = 3.8$  Hz), 136.3, 134.3, 130.9 (q,  $J = 3.6$  Hz), 129.8, 129.1, 128.2, 125.6 (q,  $J = 32.9$  Hz), 123.8 (q,  $J = 273.2$  Hz), –3.2.  $^{19}\text{F}$  NMR (376 MHz,  $\text{CDCl}_3$ ):  $\delta$  –62.72. HR-MS (ESI):  $m/z$  282.0920  $[\text{M}+\text{H}]^+$ , calcd for  $\text{C}_{14}\text{H}_{15}\text{NF}_3\text{Si}$  282.0917.

20. benzo[b]thiophen-2-yl dimethyl(phenyl)silane (**3u**).<sup>7</sup>

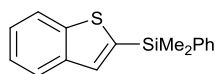

Colorless oil (40 mg, 75%).  $^1\text{H}$  NMR (400 MHz,  $\text{CDCl}_3$ ):  $\delta$  7.87–7.83 (m, 1H), 7.80–7.76 (m, 1H), 7.63–7.57 (m, 2H), 7.47 (s, 1H), 7.40–7.34 (m, 3H), 7.33–7.25 (m, 2H), 0.65 (s, 6H).  $^{13}\text{C}$  NMR (126 MHz,  $\text{CDCl}_3$ ):  $\delta$  144.0, 141.1, 140.2, 137.3, 134.1, 132.4, 129.7, 128.1, 124.5, 124.2, 123.7, 122.3, –1.4.

21. benzofuran-2-yl dimethyl(phenyl)silane (**3v**).<sup>7</sup>

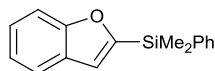

Colorless oil (34 mg, 68%).  $^1\text{H}$  NMR (400 MHz,  $\text{CDCl}_3$ ):  $\delta$  7.65–7.58 (m, 2H), 7.56 (d,  $J = 7.5$  Hz, 1H), 7.50 (d,  $J = 8.7$  Hz, 1H), 7.41–7.33 (m, 3H), 7.30–7.24 (m, 1H), 7.22–7.15 (m, 1H), 6.99 (d,  $J = 0.7$  Hz, 1H), 0.63 (s, 6H).  $^{13}\text{C}$  NMR (126 MHz,  $\text{CDCl}_3$ ):  $\delta$  161.7, 158.5, 136.3, 134.2, 133.1, 129.8, 128.1, 124.6, 122.5, 121.2, 117.8, 111.6, –2.9.

22. (4-methoxyphenyl)(methyl)diphenylsilane (**4a**).<sup>8</sup>

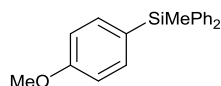

Colorless oil (35 mg, 57%).  $^1\text{H}$  NMR (400 MHz,  $\text{CDCl}_3$ ):  $\delta$  7.54–7.47 (m, 4H), 7.43 (d,  $J = 8.6$  Hz, 2H), 7.40–7.31 (m, 6H), 6.91 (d,  $J = 8.5$  Hz, 2H), 3.81 (s, 3H), 0.81 (s, 3H).  $^{13}\text{C}$  NMR (101 MHz,  $\text{CDCl}_3$ ):  $\delta$  160.8, 136.9, 136.7, 135.4, 129.4, 128.0, 127.0, 113.8, 55.2, –3.1.

23. isopropyl 4-(methyl-diphenylsilyl)benzoate (**4b**).<sup>8</sup>

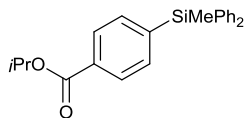

White solid (45 mg, 62%).  $^1\text{H}$  NMR (500 MHz,  $\text{CDCl}_3$ ):  $\delta$  8.00 (d,  $J = 8.0$  Hz, 2H), 7.58 (d,  $J = 8.0$  Hz, 2H), 7.51–7.46 (m, 4H), 7.44–7.39 (m, 2H), 7.39–7.33 (m, 4H), 5.30–5.20 (m, 1H), 1.36 (d,  $J = 6.2$  Hz, 6H), 0.85 (s, 3H).  $^{13}\text{C}$  NMR (126 MHz,  $\text{CDCl}_3$ ):  $\delta$  166.3, 142.4, 135.5, 135.4, 135.3, 131.8, 129.8, 128.7, 128.1, 68.5, 22.1, –3.4.

24. [1,1'-biphenyl]-3-yl(methyl)diphenylsilane (**4c**).

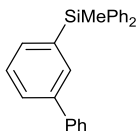

White solid (44 mg, 63%).  $^1\text{H}$  NMR (400 MHz,  $\text{CDCl}_3$ ):  $\delta$  7.48–7.18 (m, 15H), 7.13 (t,  $J = 7.6$  Hz, 2H), 7.07–7.00 (m, 2H), 0.10 (s, 3H).  $^{13}\text{C}$  NMR (126 MHz,  $\text{CDCl}_3$ ):  $\delta$  150.2, 144.0, 138.0, 137.7, 135.3, 134.7, 129.9, 129.5, 129.4, 129.1, 127.9, 127.7, 127.1, 126.2, –3.2. HR-MS (ESI):  $m/z$  351.1564  $[\text{M}+\text{H}]^+$ , calcd for  $\text{C}_{25}\text{H}_{23}\text{Si}$  351.1557.

25. methyl(naphthalen-2-yl)diphenylsilane (**4d**).<sup>7</sup>

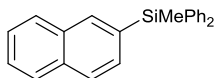

Colorless oil (33 mg, 51%).  $^1\text{H}$  NMR (400 MHz,  $\text{CDCl}_3$ ):  $\delta$  8.01 (s, 1H), 7.86–7.75 (m, 3H), 7.62–7.52 (m, 5H), 7.52–7.44 (m, 2H), 7.44–7.32 (m, 6H), 0.91 (s, 3H).  $^{13}\text{C}$  NMR (101 MHz,  $\text{CDCl}_3$ ):  $\delta$  136.4, 136.2, 135.5, 134.0, 133.7, 133.0, 131.3, 129.6, 128.4, 128.1, 127.9, 127.2, 126.8, 126.1, –3.2.

26. 2-(methyl-diphenylsilyl)pyridine (**4e**).

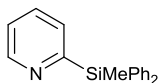

Colorless oil (44 mg, 80%).  $^1\text{H}$  NMR (500 MHz,  $\text{CDCl}_3$ ):  $\delta$  8.84 (d,  $J = 4.8$  Hz, 1H), 7.58 (dd,  $J = 7.7, 1.4$  Hz, 4H), 7.52 (dt,  $J = 7.6, 1.6$  Hz, 1H), 7.43 (d,  $J = 7.5$  Hz, 1H), 7.41–7.32 (m, 6H), 7.22–7.17 (m, 1H), 0.90 (s, 3H).  $^{13}\text{C}$  NMR (126 MHz,  $\text{CDCl}_3$ ):  $\delta$  164.9, 150.6, 135.4, 134.2, 131.1, 129.6, 128.0, 123.1, –3.9. HR-MS (ESI):  $m/z$  276.1203  $[\text{M}+\text{H}]^+$ , calcd for  $\text{C}_{18}\text{H}_{18}\text{NSi}$  276.1201.

27. isopropyl 4-(triphenylsilyl)benzoate (**5a**).<sup>8</sup>

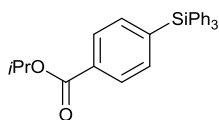

White solid (42.2 mg, 50%).  $^1\text{H}$  NMR (500 MHz,  $\text{CDCl}_3$ ):  $\delta$  8.02 (d,  $J = 8.3$  Hz, 2H), 7.65 (d,  $J = 8.3$  Hz, 2H), 7.58–7.52 (m, 6H), 7.48–7.41 (m, 3H), 7.41–7.35 (m, 6H), 5.32–5.20 (m, 1H), 1.36 (d,  $J = 6.3$  Hz, 6H).  $^{13}\text{C}$  NMR (126 MHz,  $\text{CDCl}_3$ ):  $\delta$  166.3, 140.5, 136.5, 136.4, 133.6, 132.0, 130.0, 128.7, 128.1, 68.6, 22.1.

28. 2-(triphenylsilyl)pyridine (**5b**).

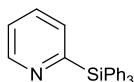

Drak brown solid (38 mg, 57%).  $^1\text{H}$  NMR (500 MHz,  $\text{CDCl}_3$ ):  $\delta$  8.90 (d,  $J = 4.8$  Hz, 1H), 7.63 (dd,  $J = 7.9, 1.3$  Hz, 6H), 7.53 (dt,  $J = 7.6, 1.7$  Hz, 1H), 7.46 (d,  $J = 7.5$  Hz, 1H), 7.44–7.38 (m, 3H), 7.38–7.32 (m, 6H), 7.24–7.19 (m, 1H).  $^{13}\text{C}$  NMR (126 MHz,  $\text{CDCl}_3$ ):  $\delta$  163.6, 150.6, 136.6, 134.2, 133.7, 132.2, 129.8, 128.0, 123.2. HR-MS (ESI):  $m/z$  338.1360  $[\text{M}+\text{H}]^+$ , calcd for  $\text{C}_{23}\text{H}_{20}\text{NSi}$  338.1359.

## References

- 1 C. K. Chu, Y.-F. Liang and G. C. Fu, *J. Am. Chem. Soc.*, 2016, **138**, 6404.
- 2 A. Krasovskiy and P. Knochel, *Synthesis*, 2006, 890.
- 3 J. Drabowicz, P. Łyżwa, M. Popielarczyk and M. Mikołajczyk, *Synthesis*, 1990, 937.
- 4 K. Yamamoto, S. Otsuka, K. Nogi and H. Yorimitsu, *ACS Catal.*, 2017, **7**, 7623.
- 5 Y.-H. Li, G. Bao and X.-F. Wu, *Chem. Sci.*, 2020, **11**, 2187.
- 6 T. Itoh and T. Mase, *J. Org. Chem.*, 2006, **71**, 2203.
- 7 W. Srimontree, W. Lakornwong and M. Rueping, *Org. Lett.*, 2019, **21**, 9330.
- 8 Y.-Y. Kong and Z.-X. Wang, *Adv. Synth. Catal.*, 2019, **361**, 5440.
- 9 H. Guo, X. Chen, C. Zhao and W. He, *Chem. Commun.*, 2015, **51**, 17410.

## 5. Copies of NMR spectra of the silylation products

$^1\text{H}$  NMR spectrum of mixture of dimethyldiphenylsilane (**3a**) and  $(\text{PhMe}_2\text{Si})_2$

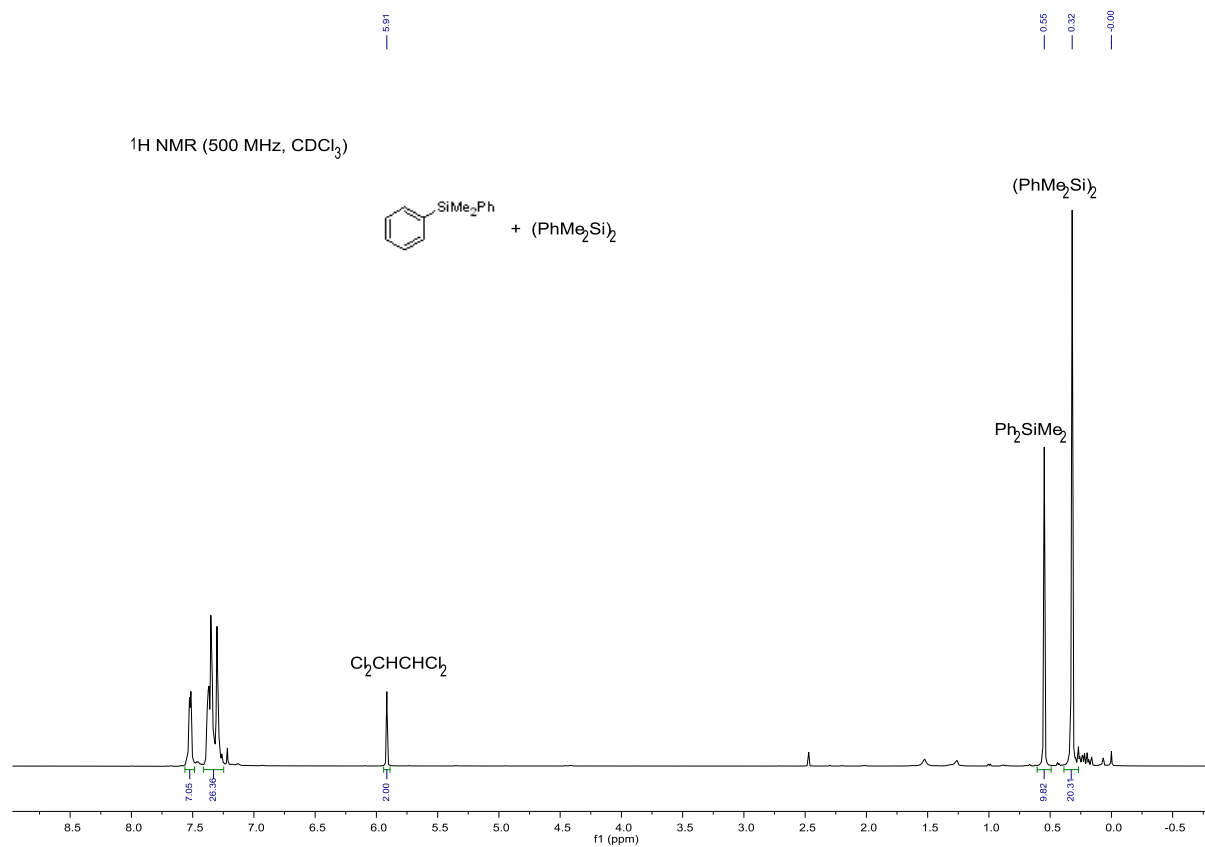

# (4-Methoxyphenyl)dimethyl(phenyl)silane (**3b**)

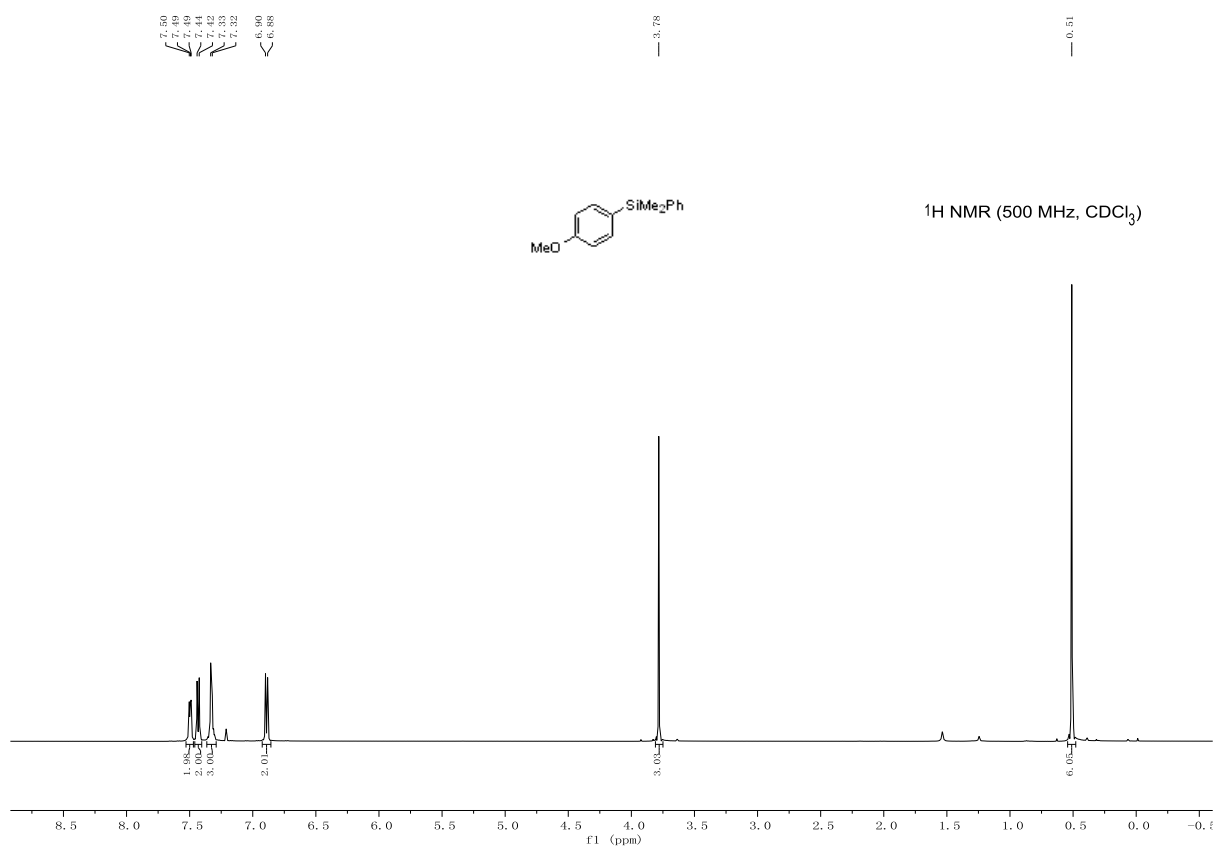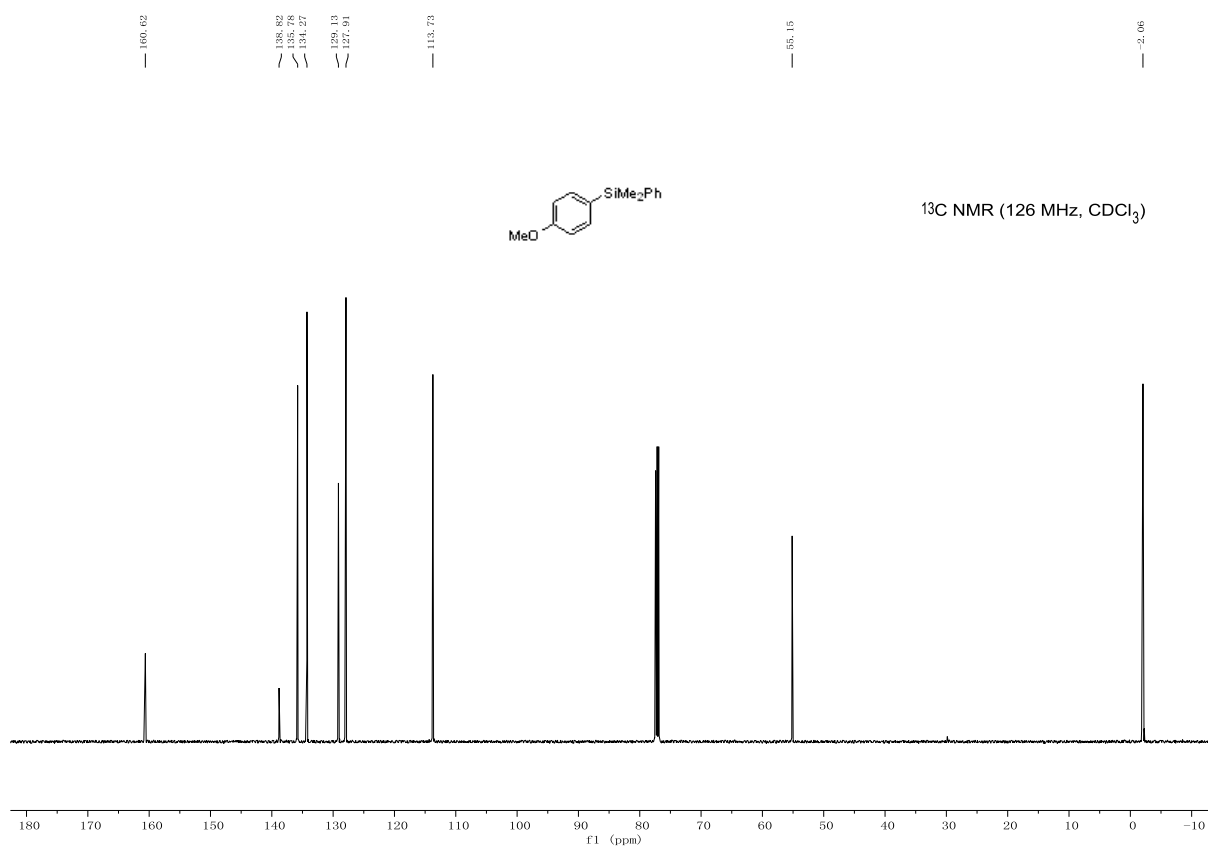

# Dimethyl(4-phenoxyphenyl)(phenyl)silane (**3c**)

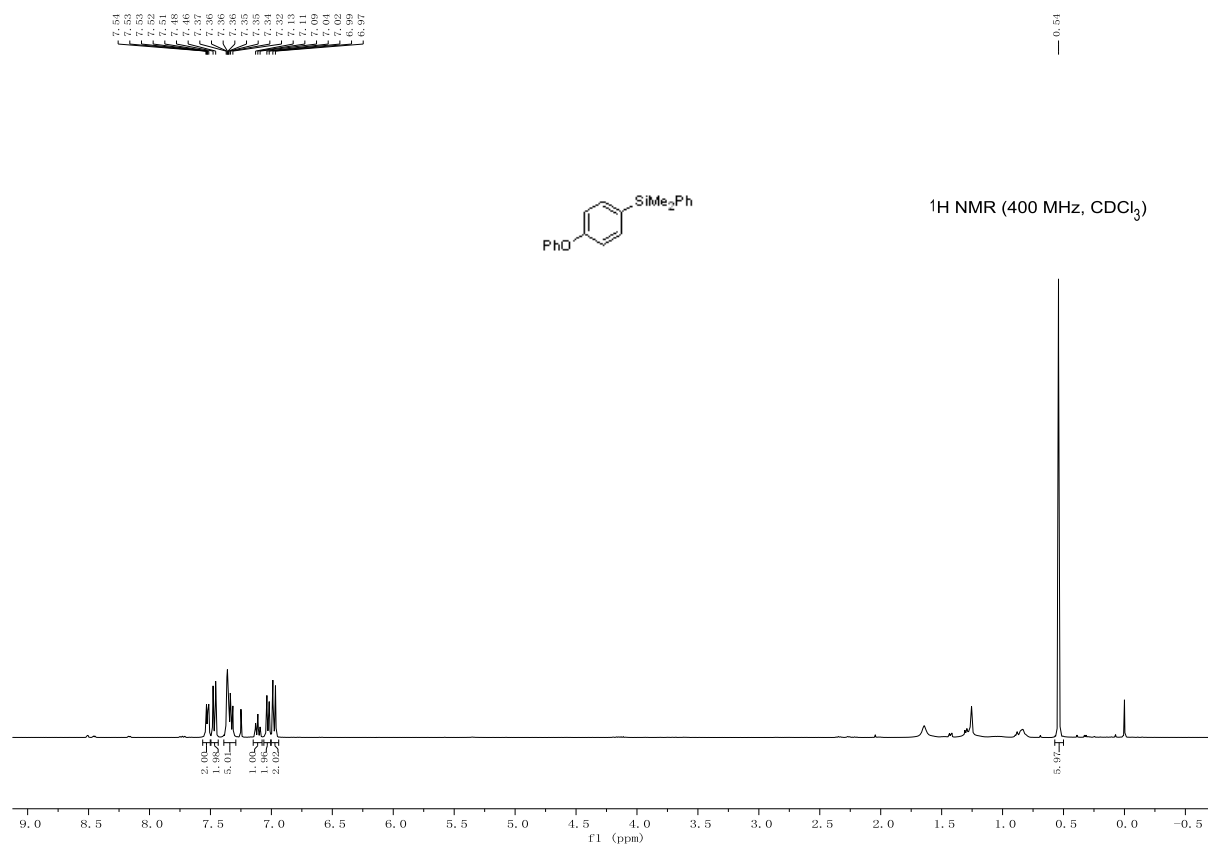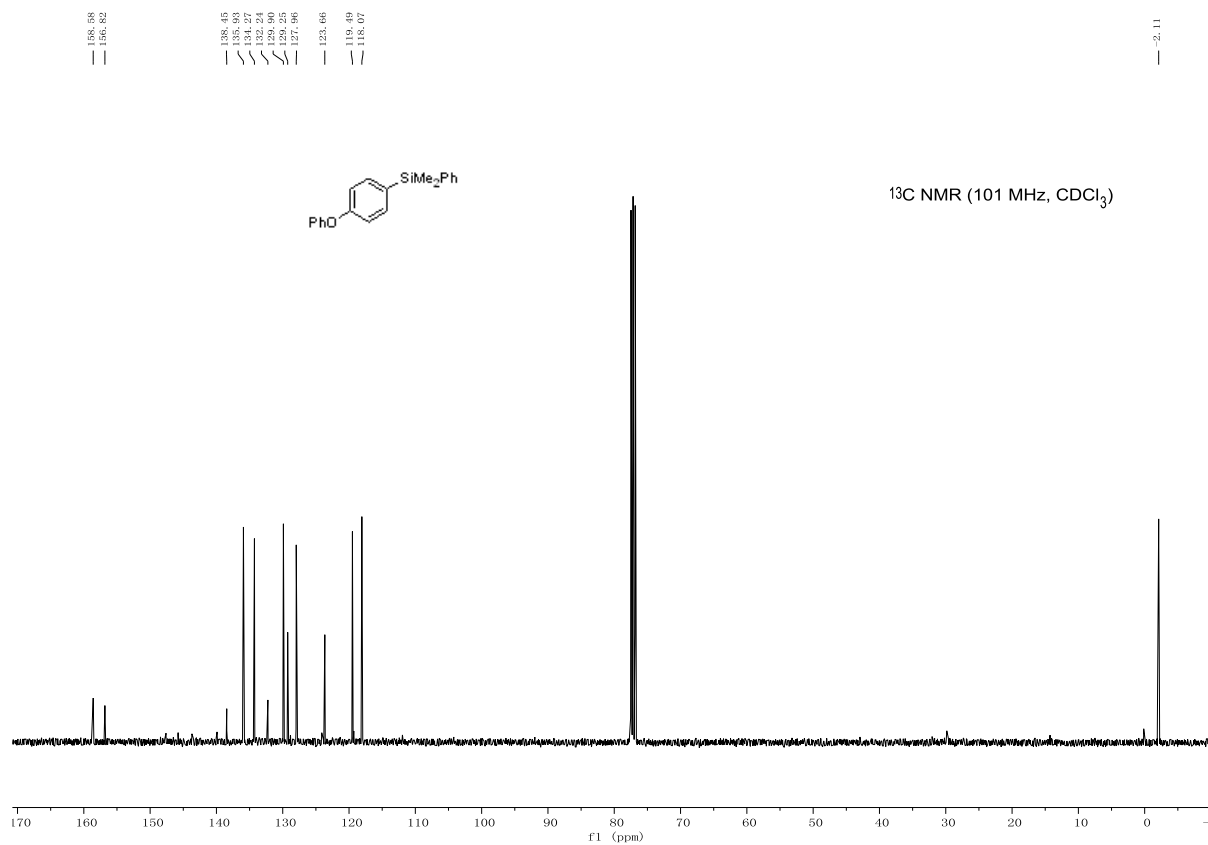

# Benzo[d][1,3]dioxol-5-yl dimethyl(phenyl)silane (**3d**)

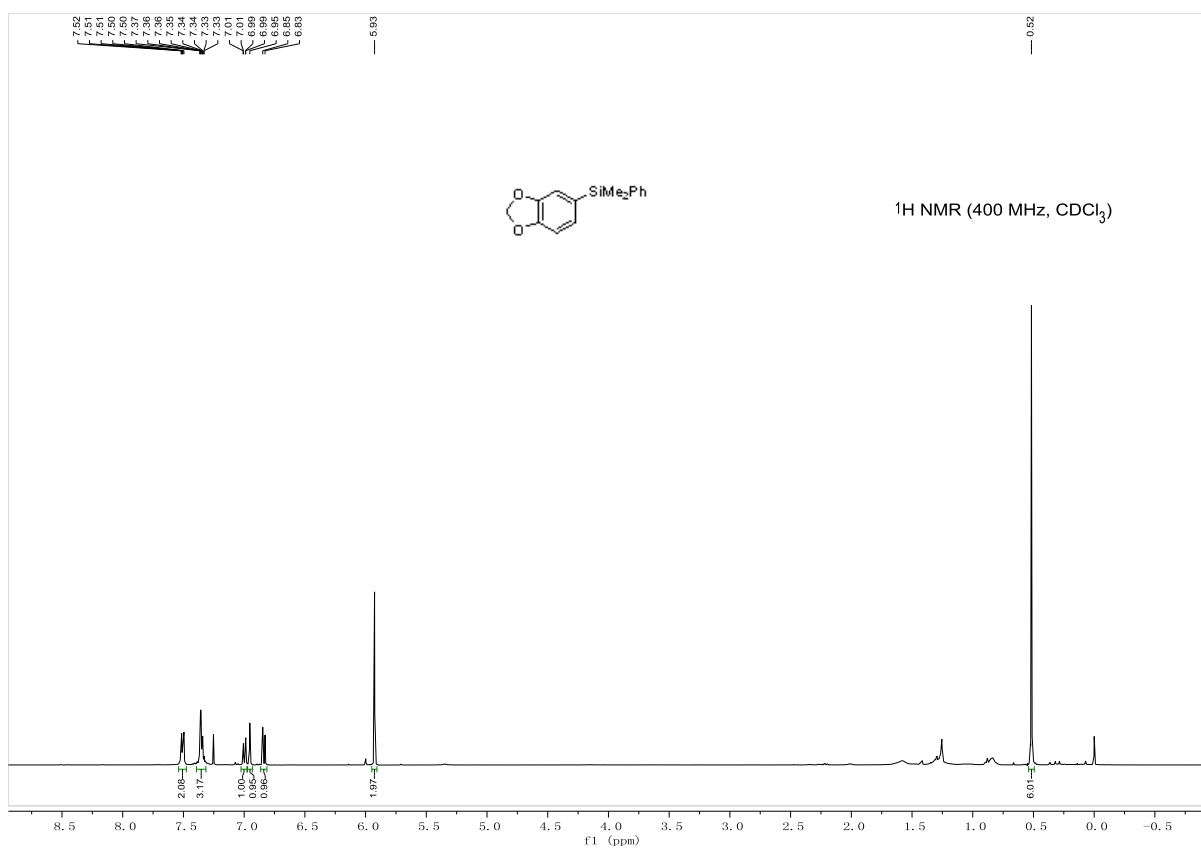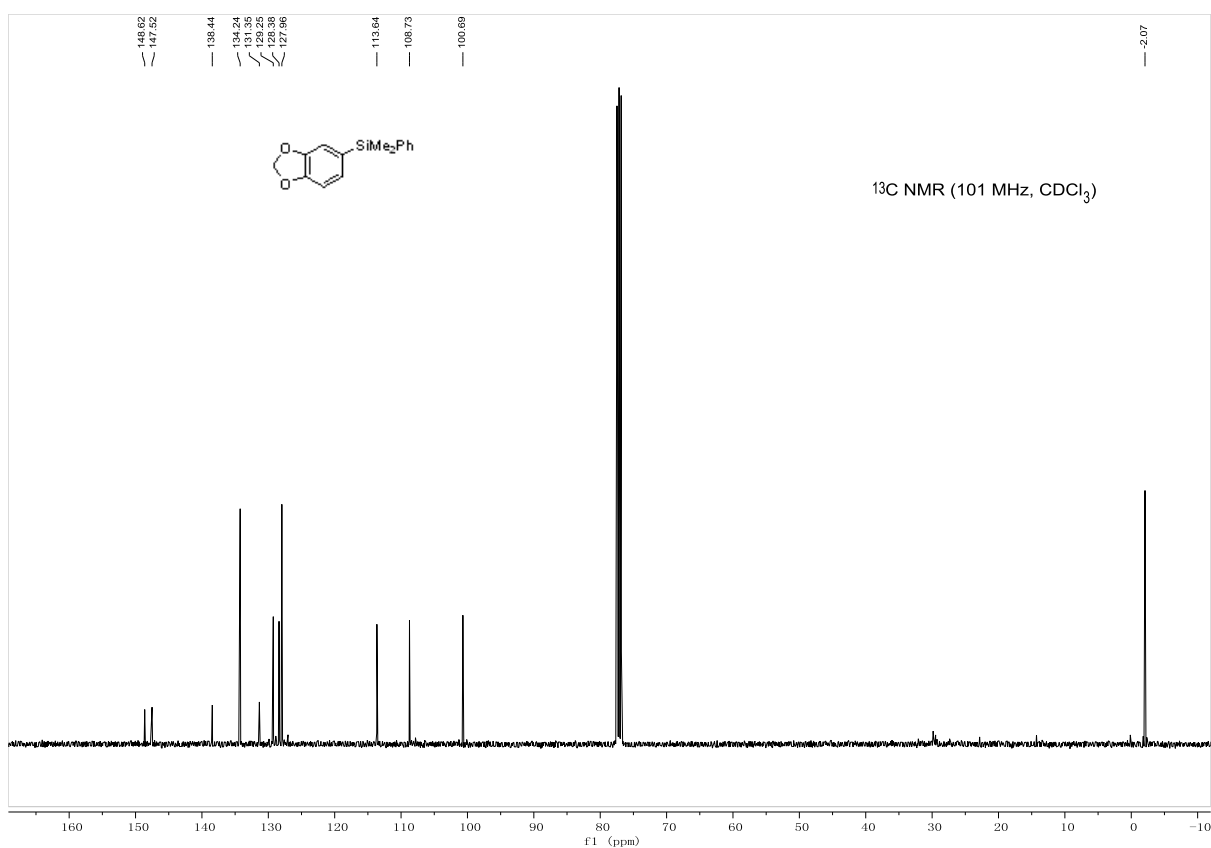

# N-(4-(Dimethyl(phenyl)silyl)phenyl)acetamide (**3e**)

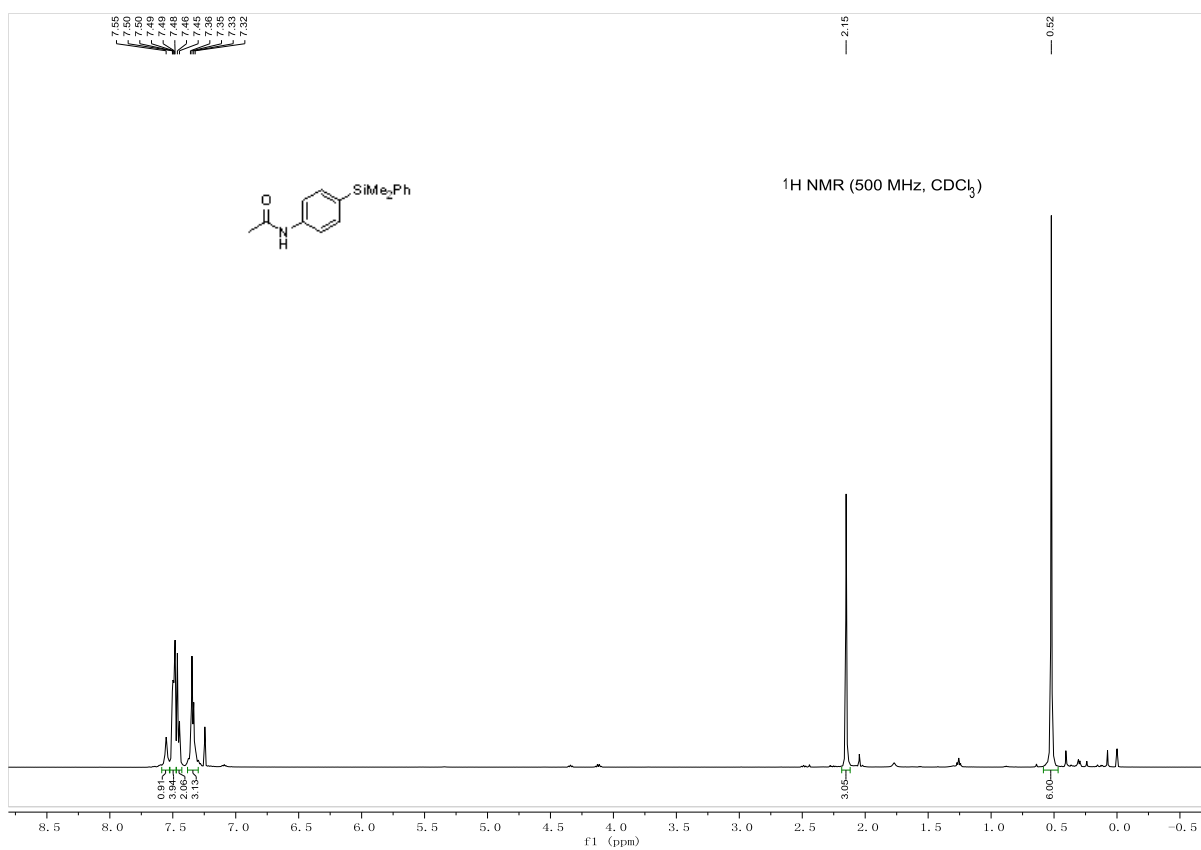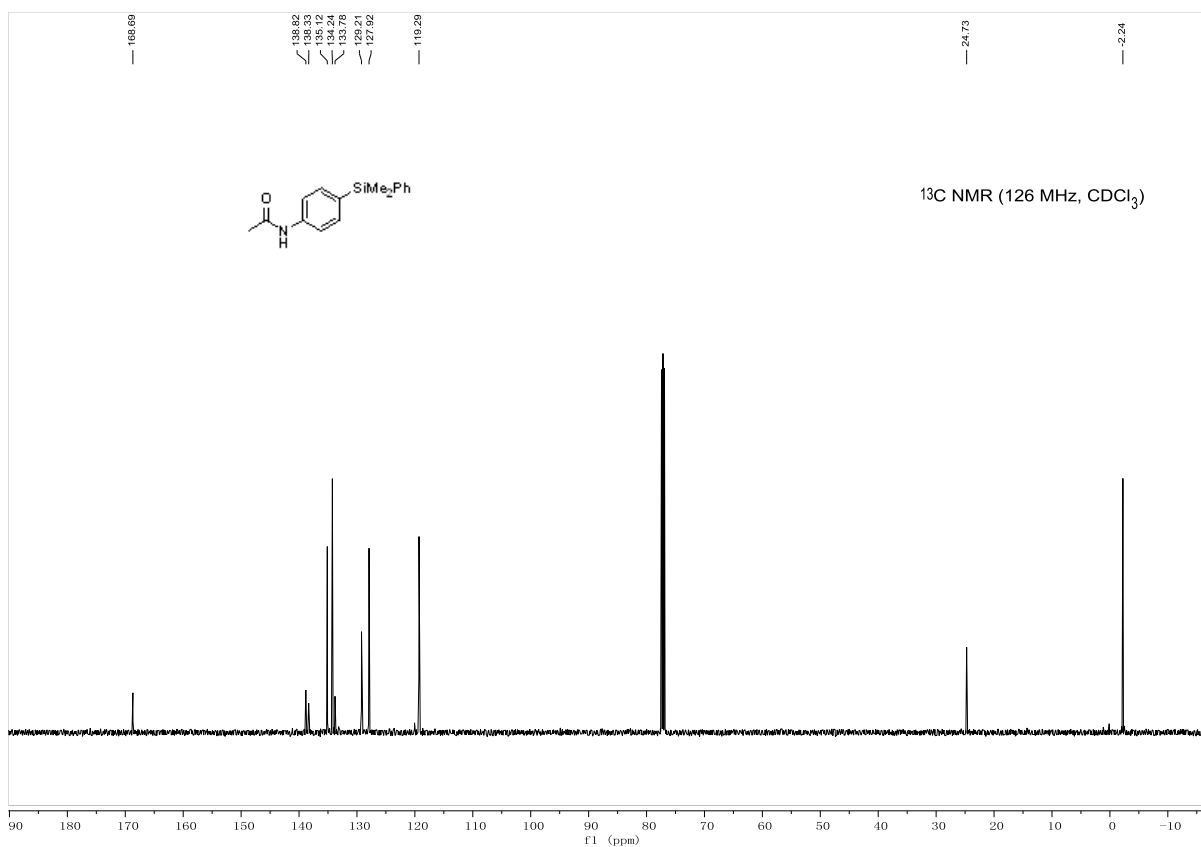



N-(4-(Dimethyl(phenyl)silyl)phenyl)-N-methylacetamide (**3f**)

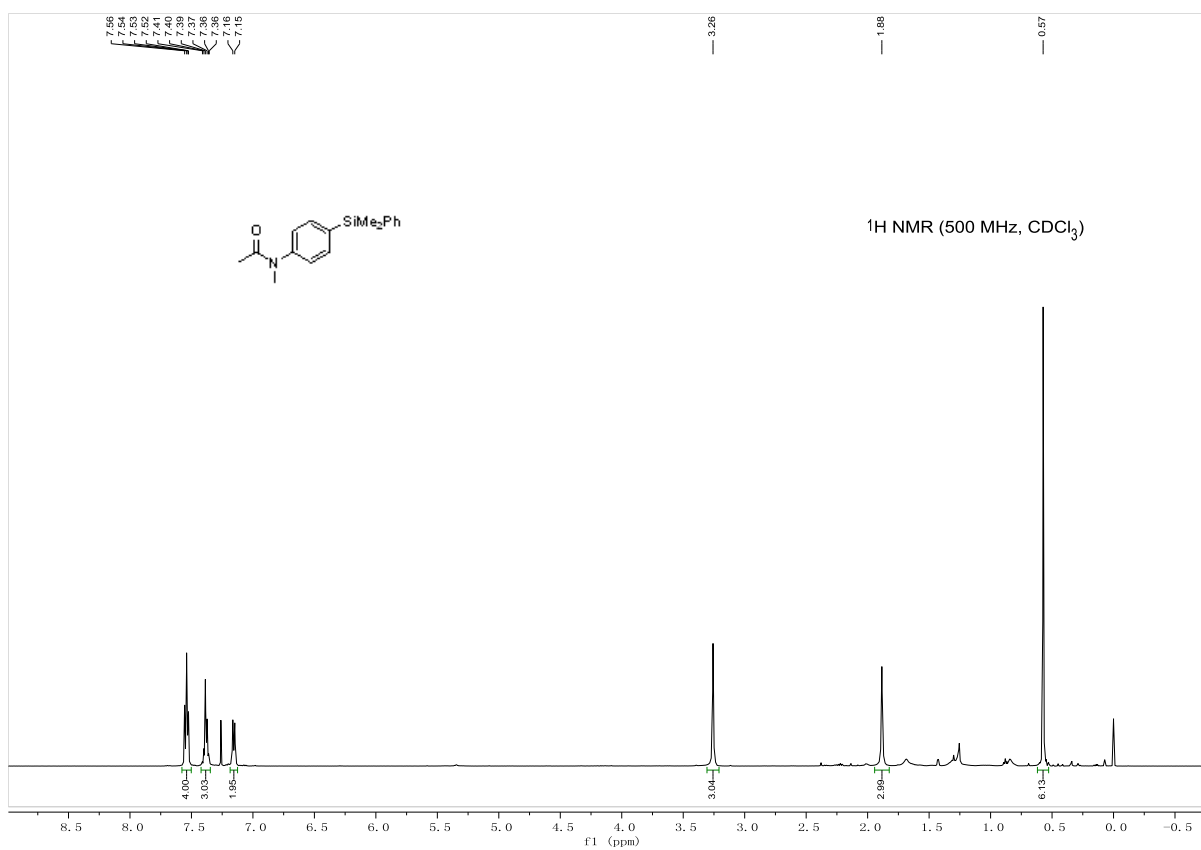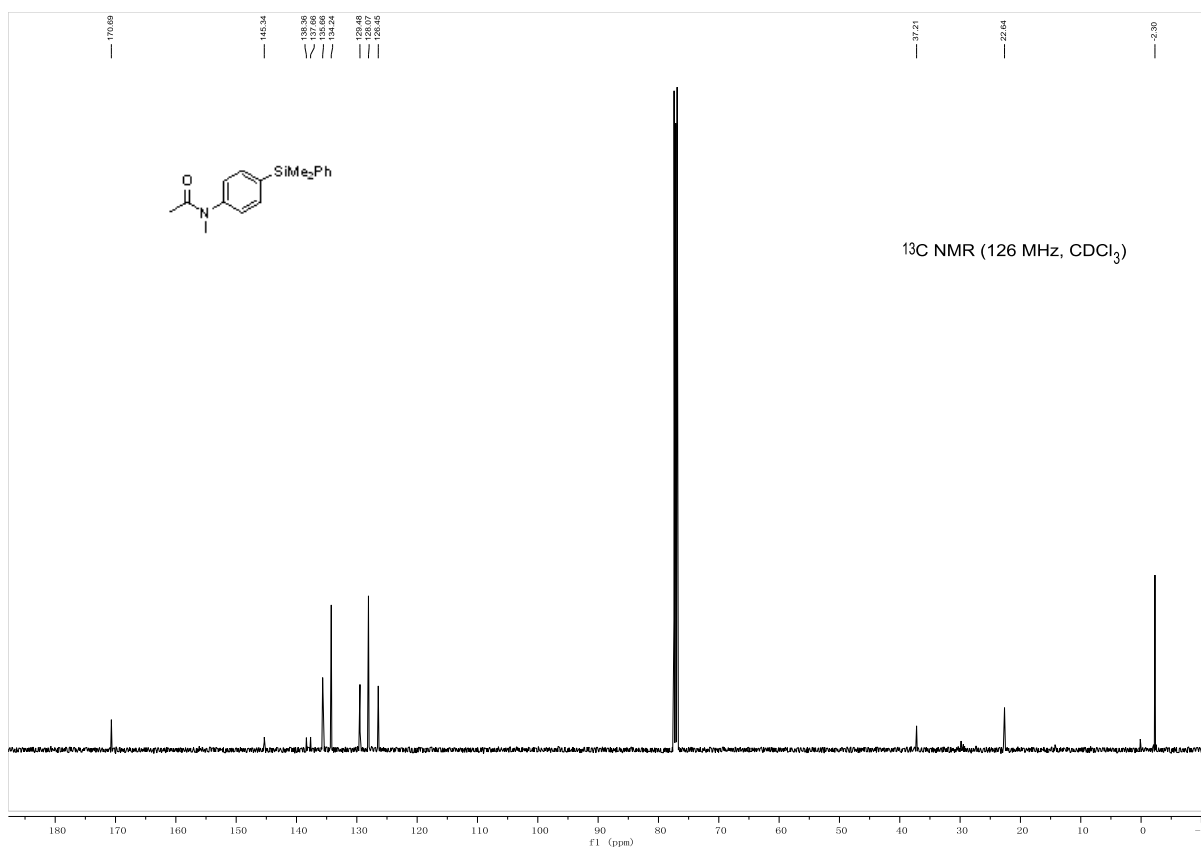

[1,1'-Biphenyl]-4-yl dimethyl(phenyl)silane (**3g**)

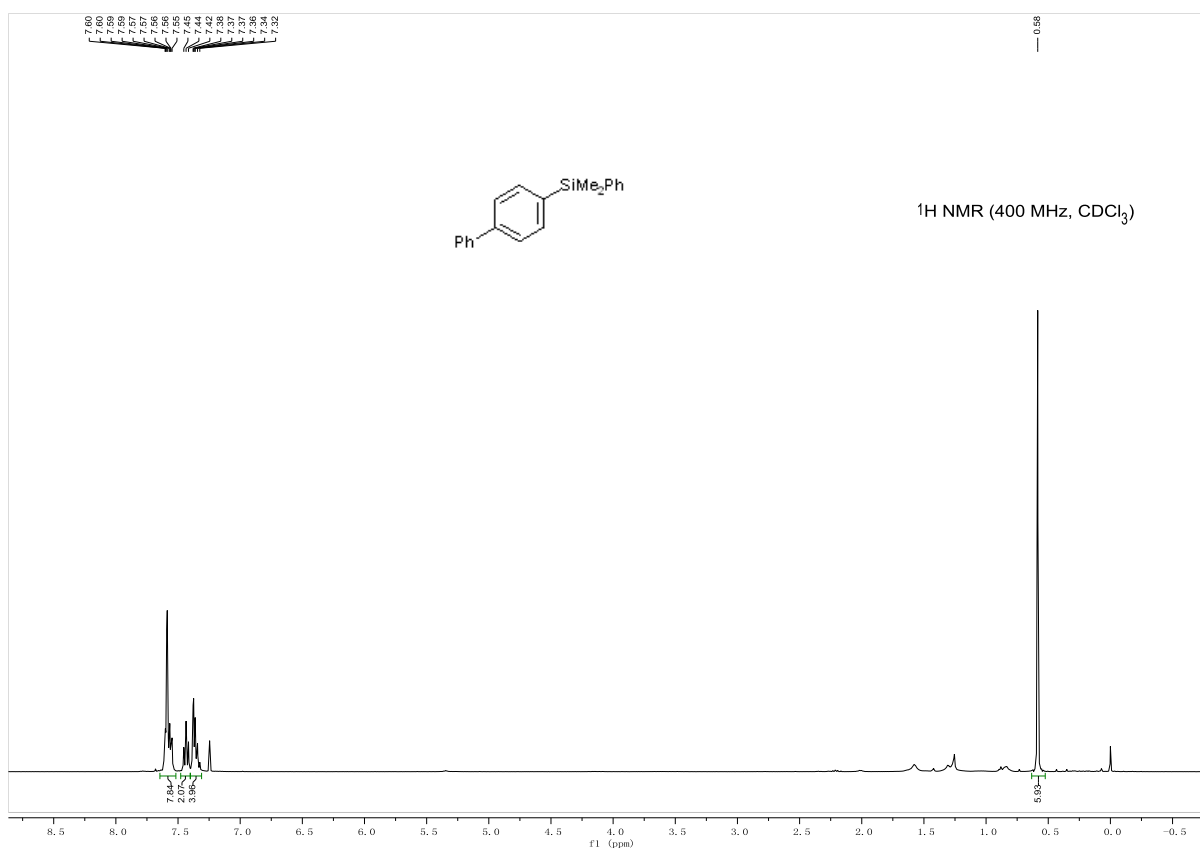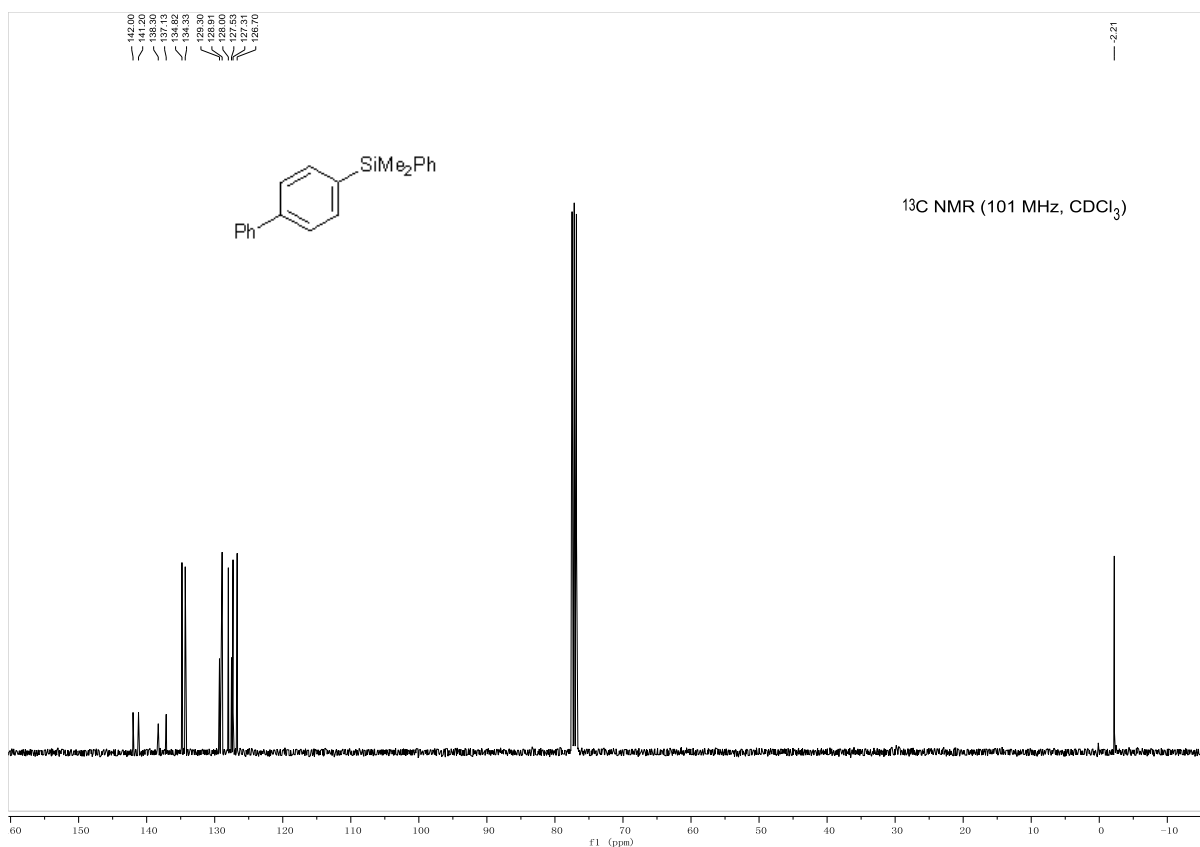

[1,1'-Biphenyl]-3-yl dimethyl(phenyl)silane (**3h**)

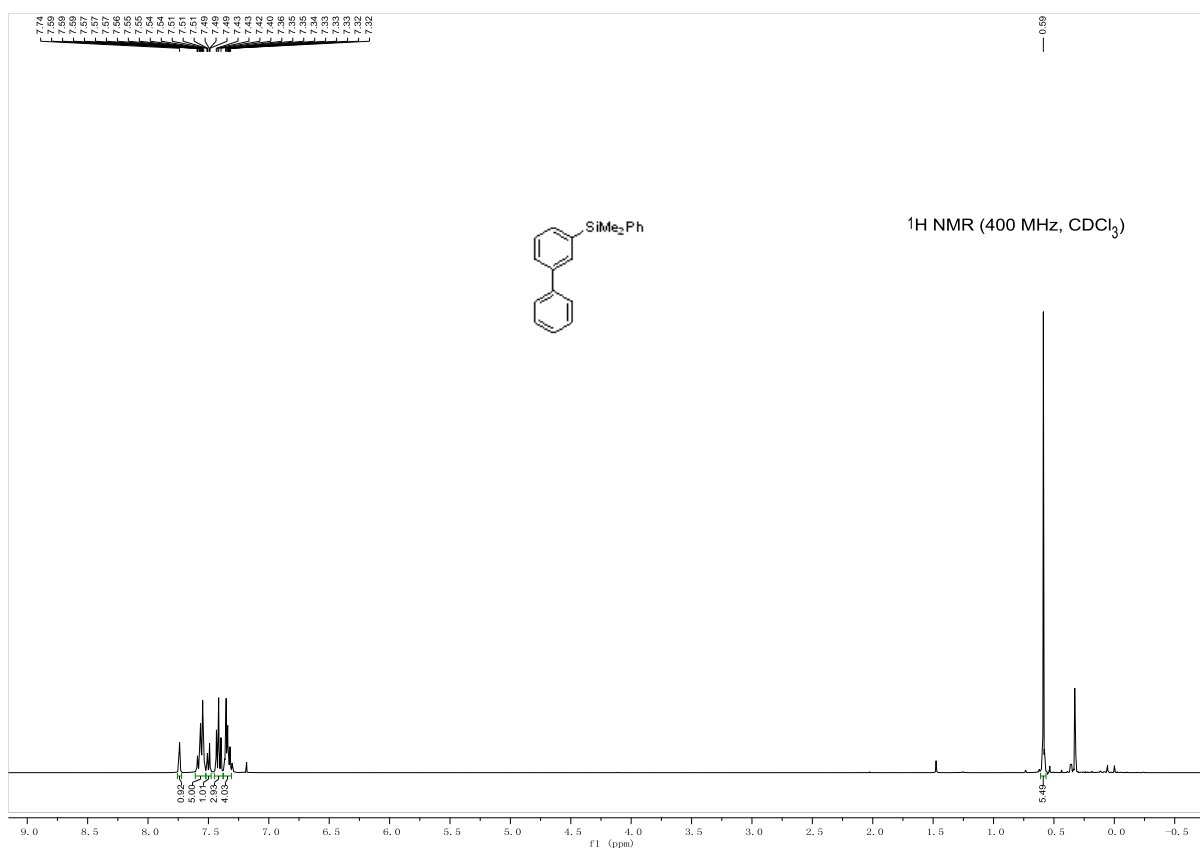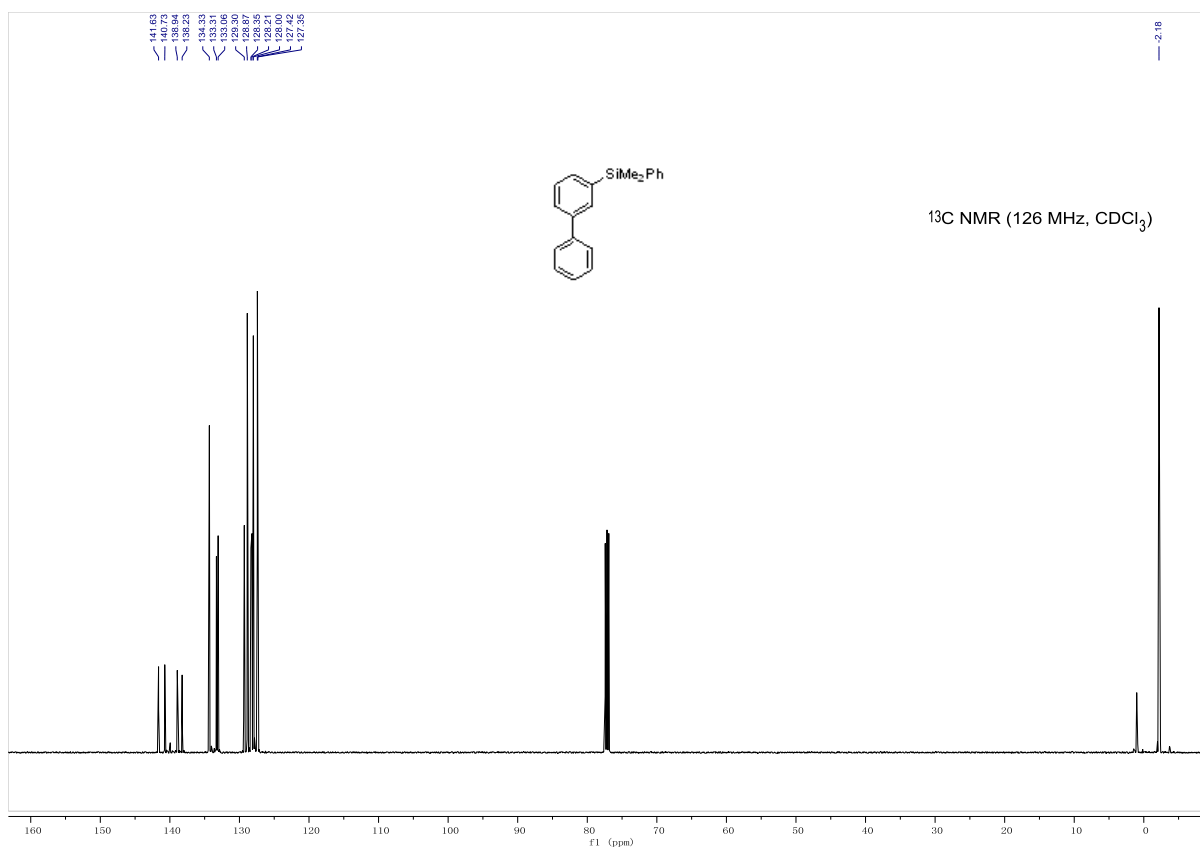

(4'-Fluoro-[1,1'-biphenyl]-4-yl)dimethyl(phenyl)silane (**3i**)

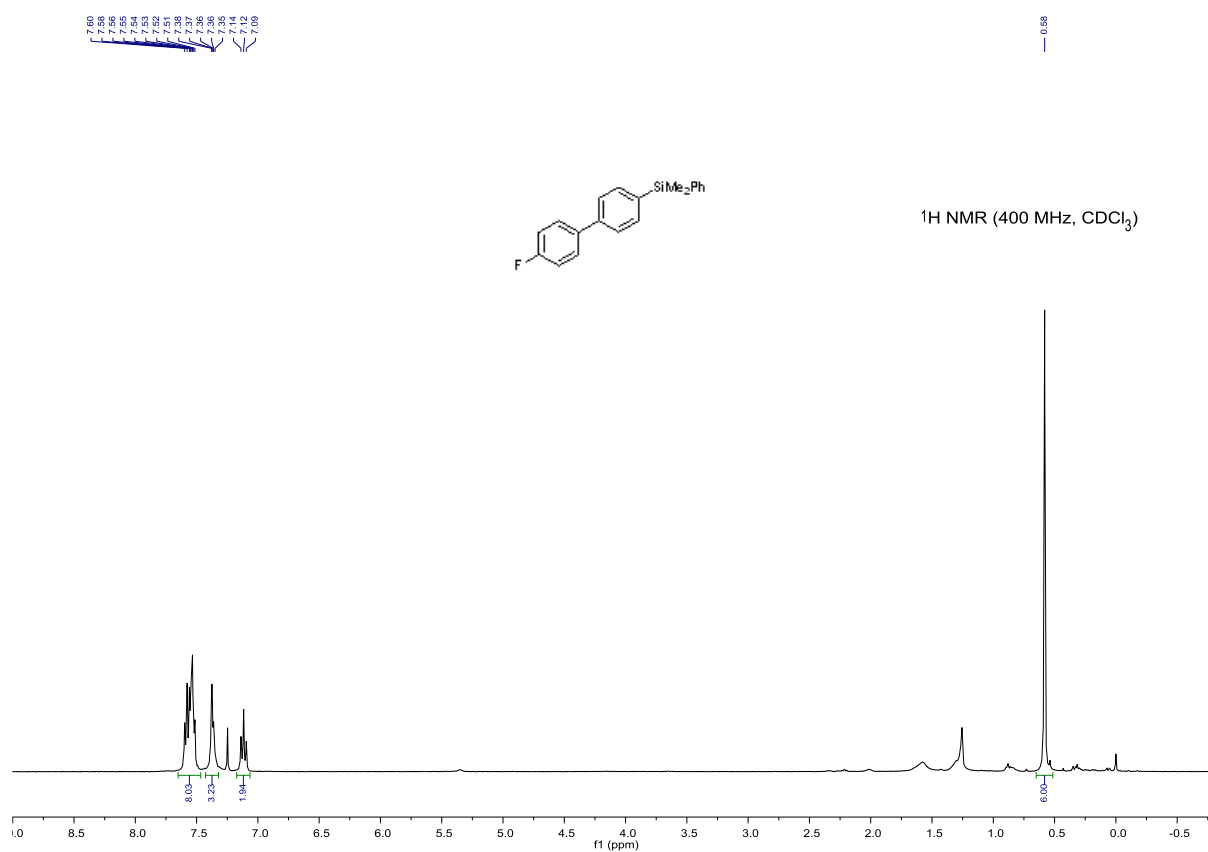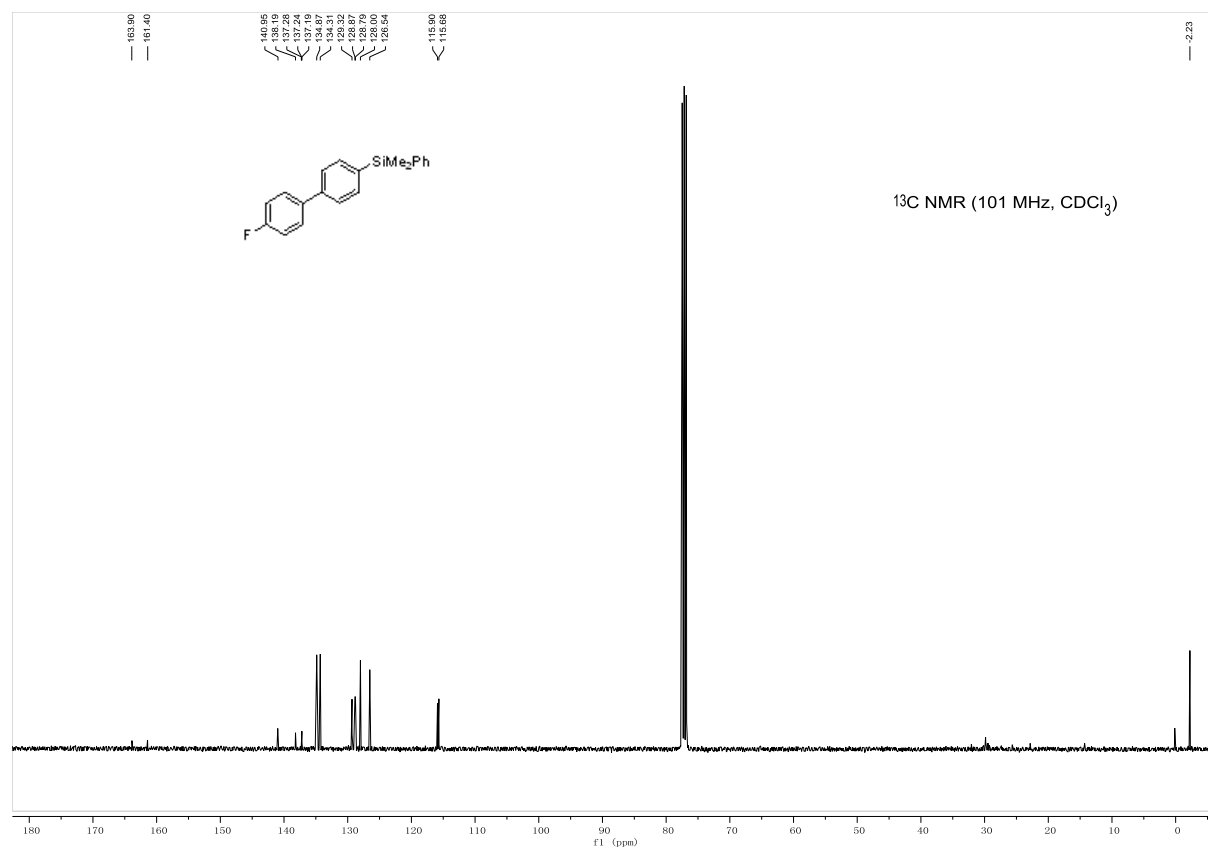

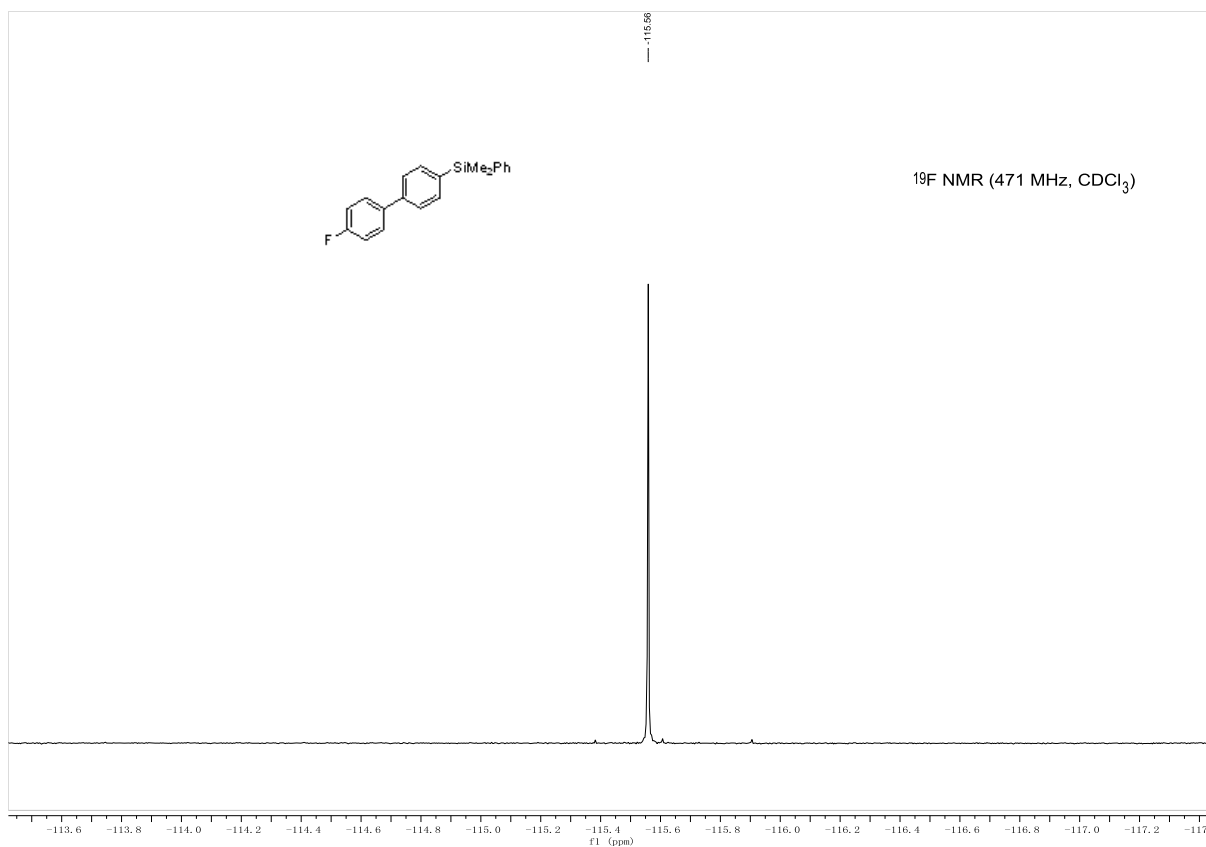

# Dimethyl(naphthalen-2-yl)(phenyl)silane (**3j**)

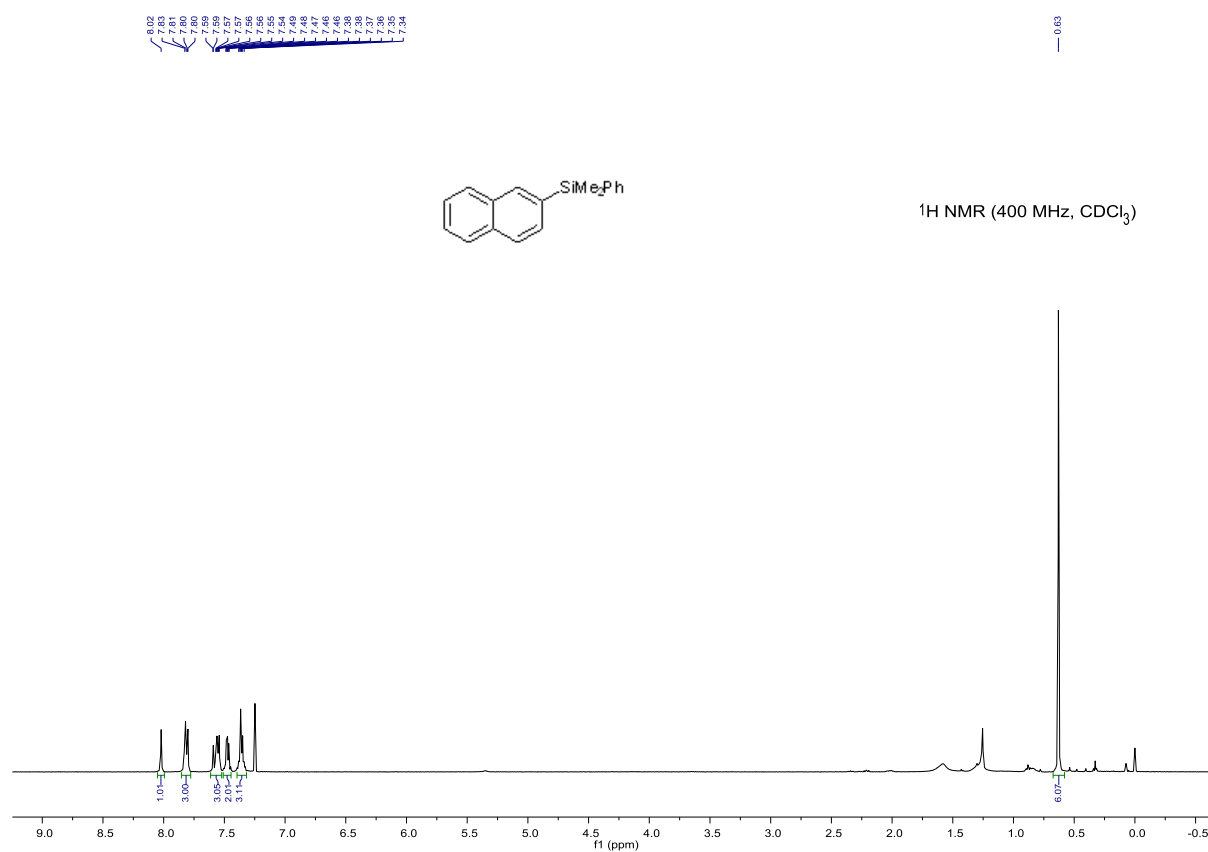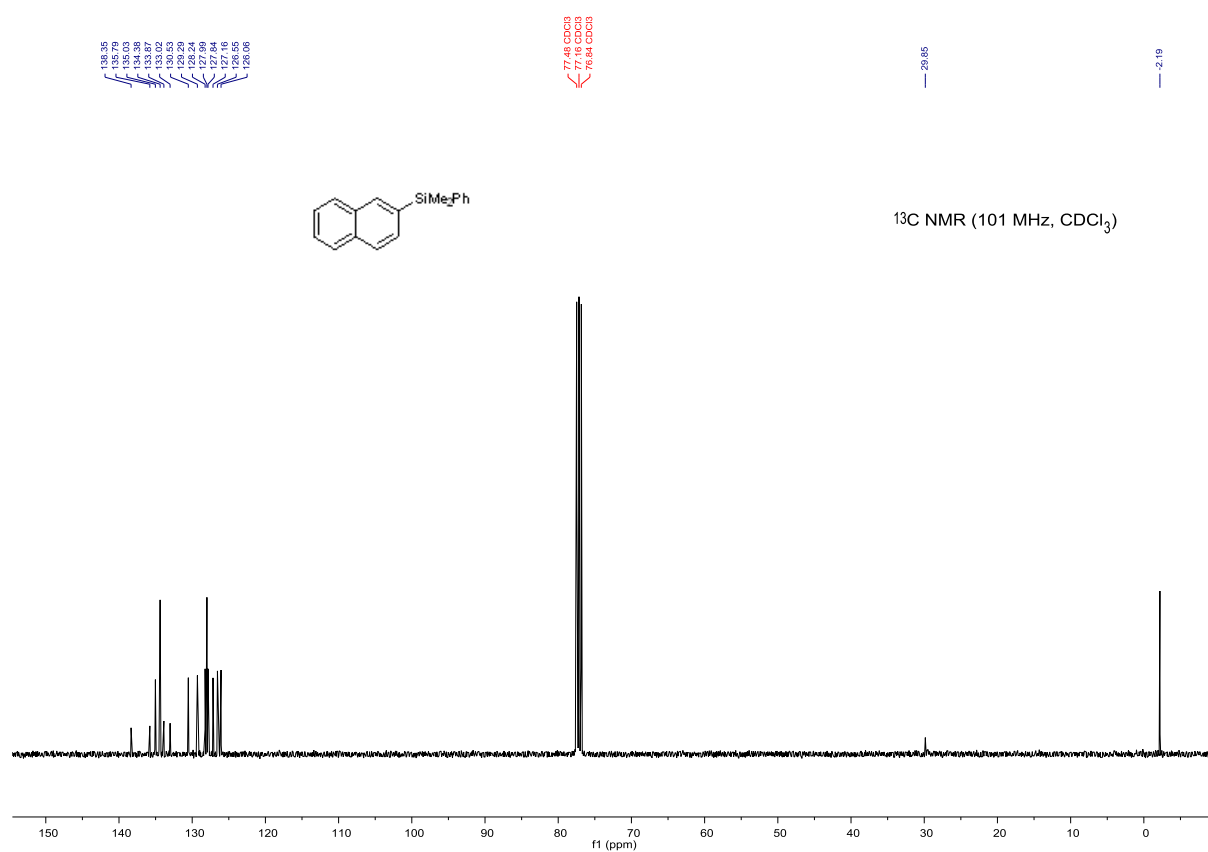

# Dimethyl(naphthalen-1-yl)(phenyl)silane (**3k**)

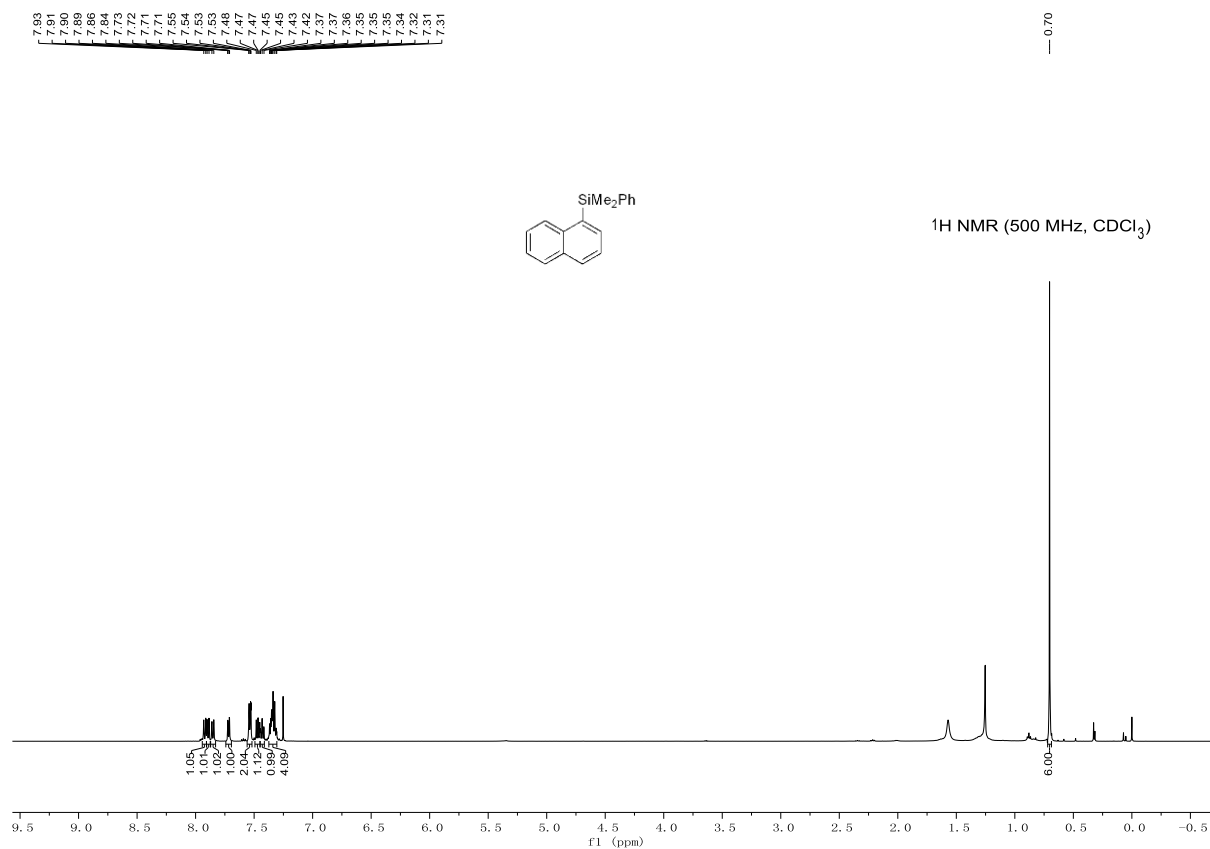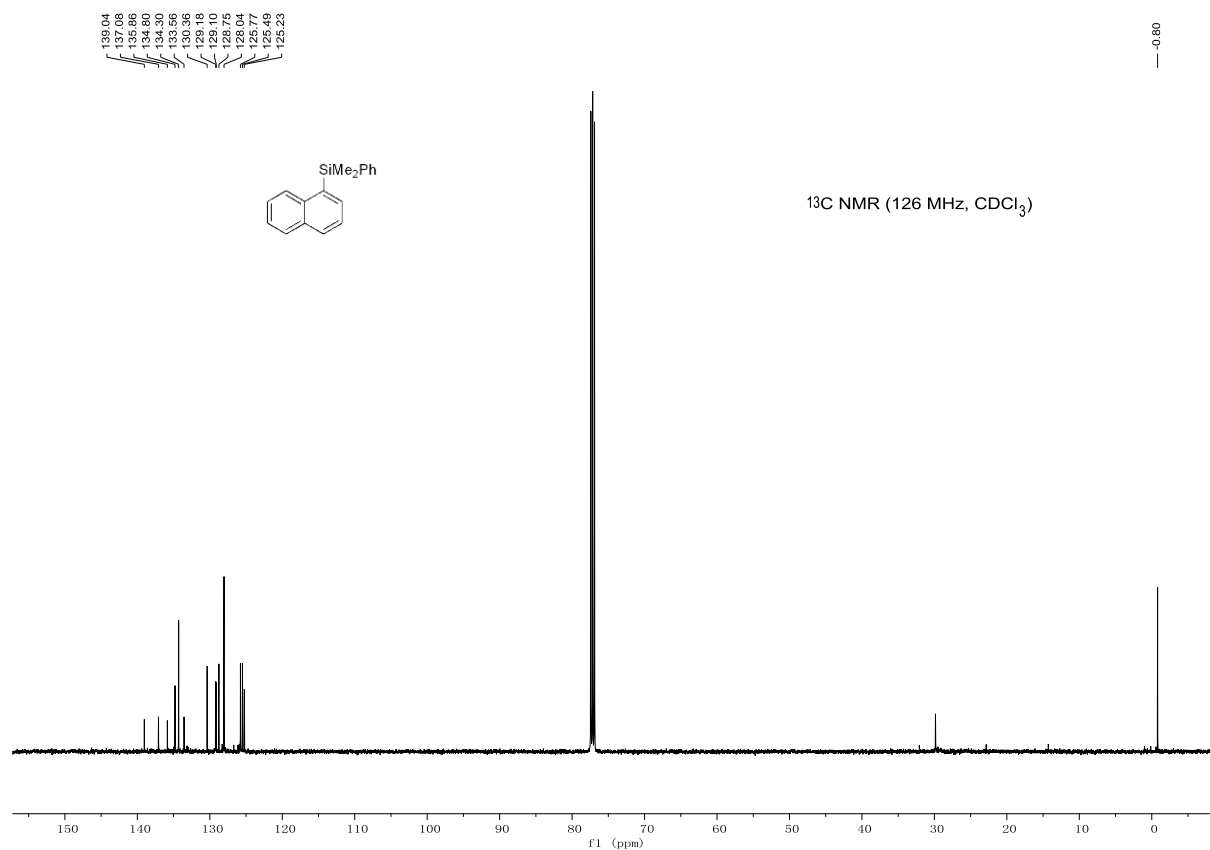

# Dimethyl(phenyl)(4-(trifluoromethyl)phenyl)silane (**3l**)

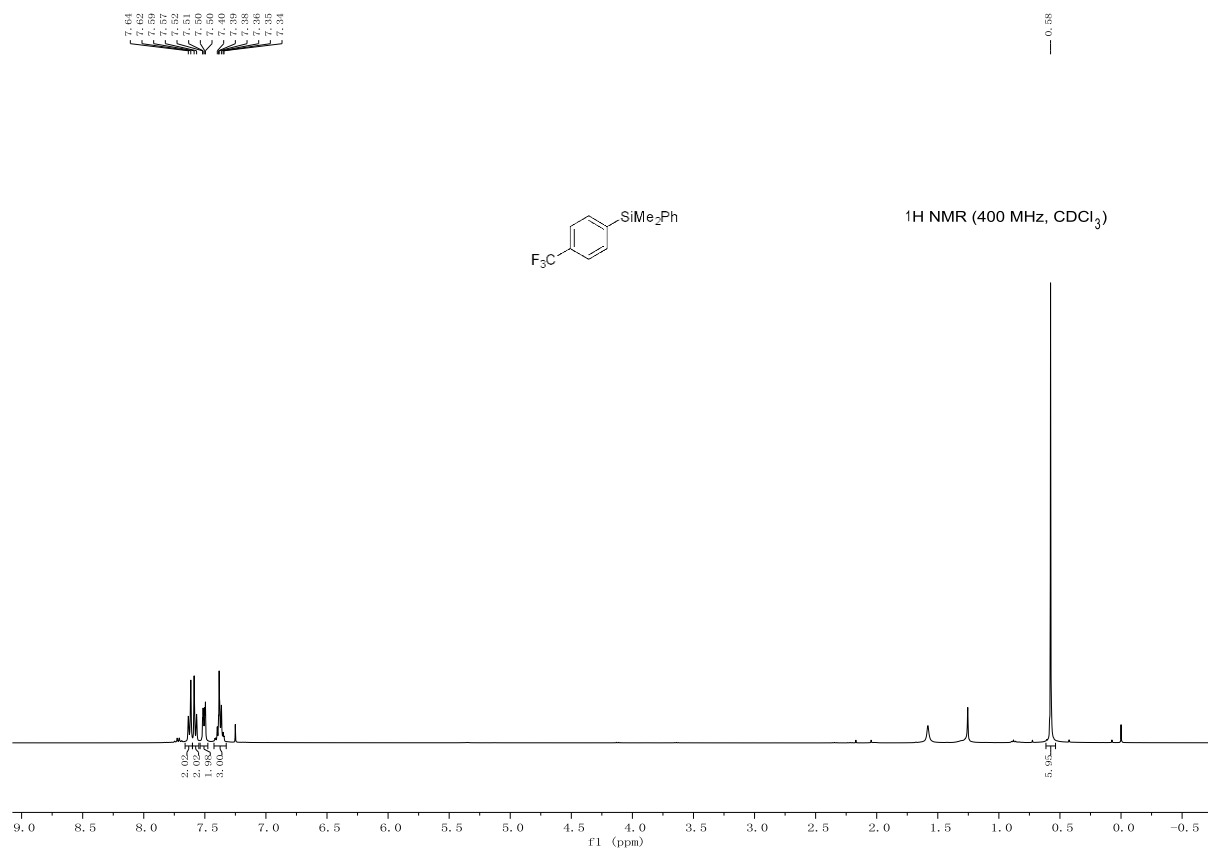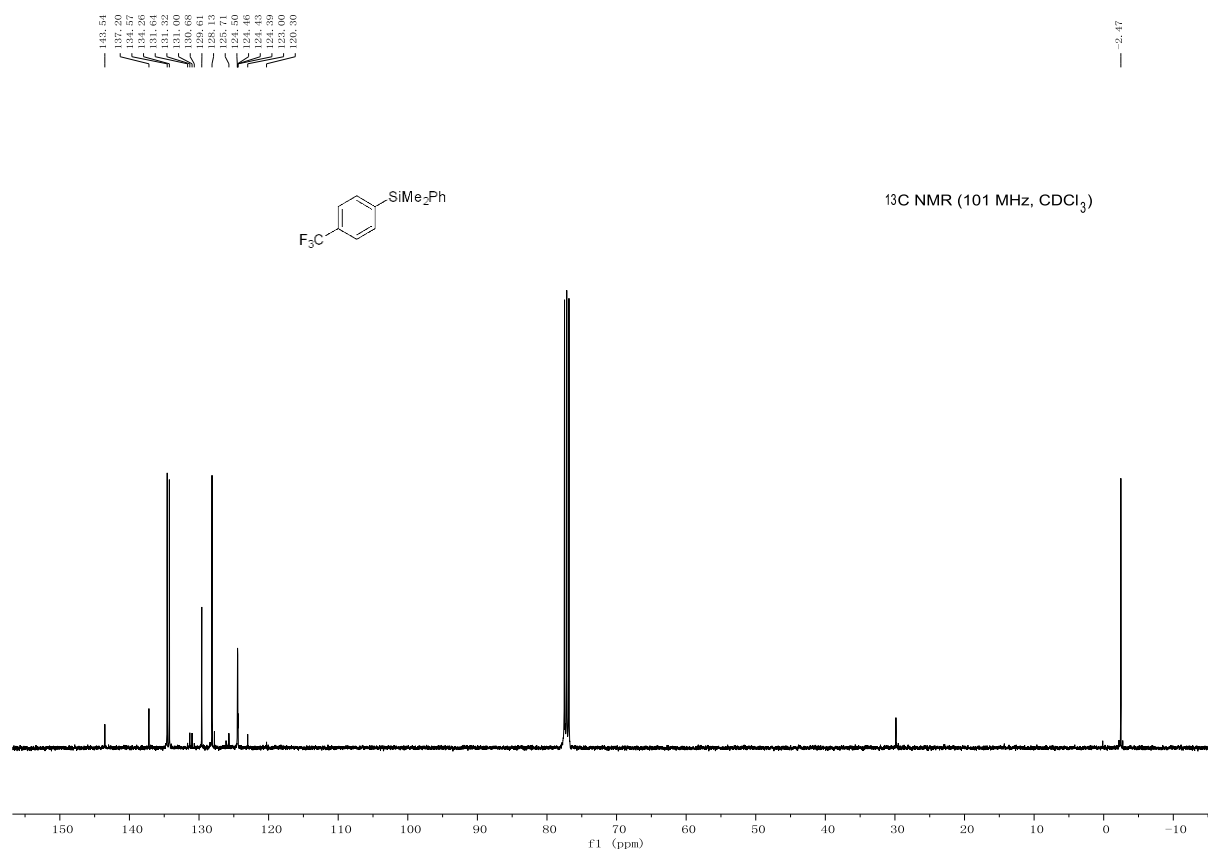



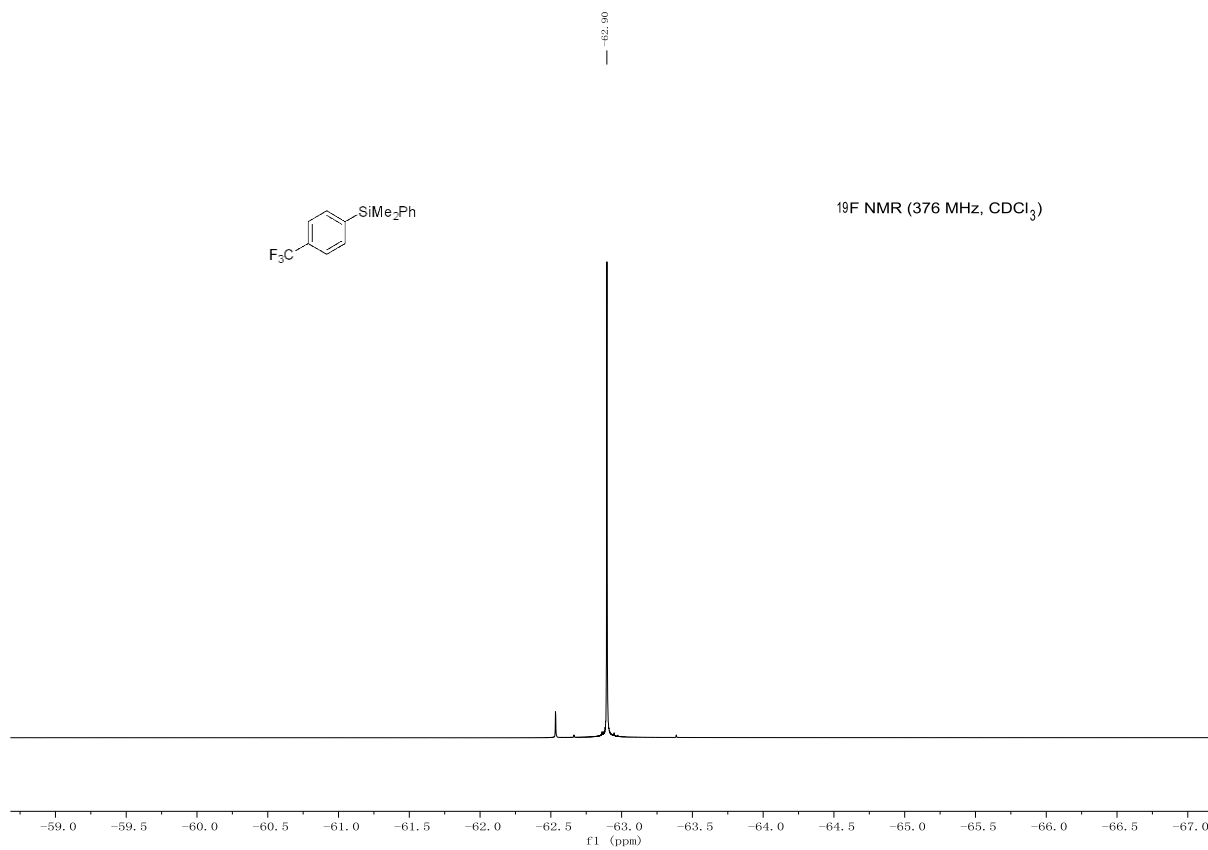

(4-(Dimethyl(phenyl)silyl)phenyl)(phenyl)methanone (**3m**)

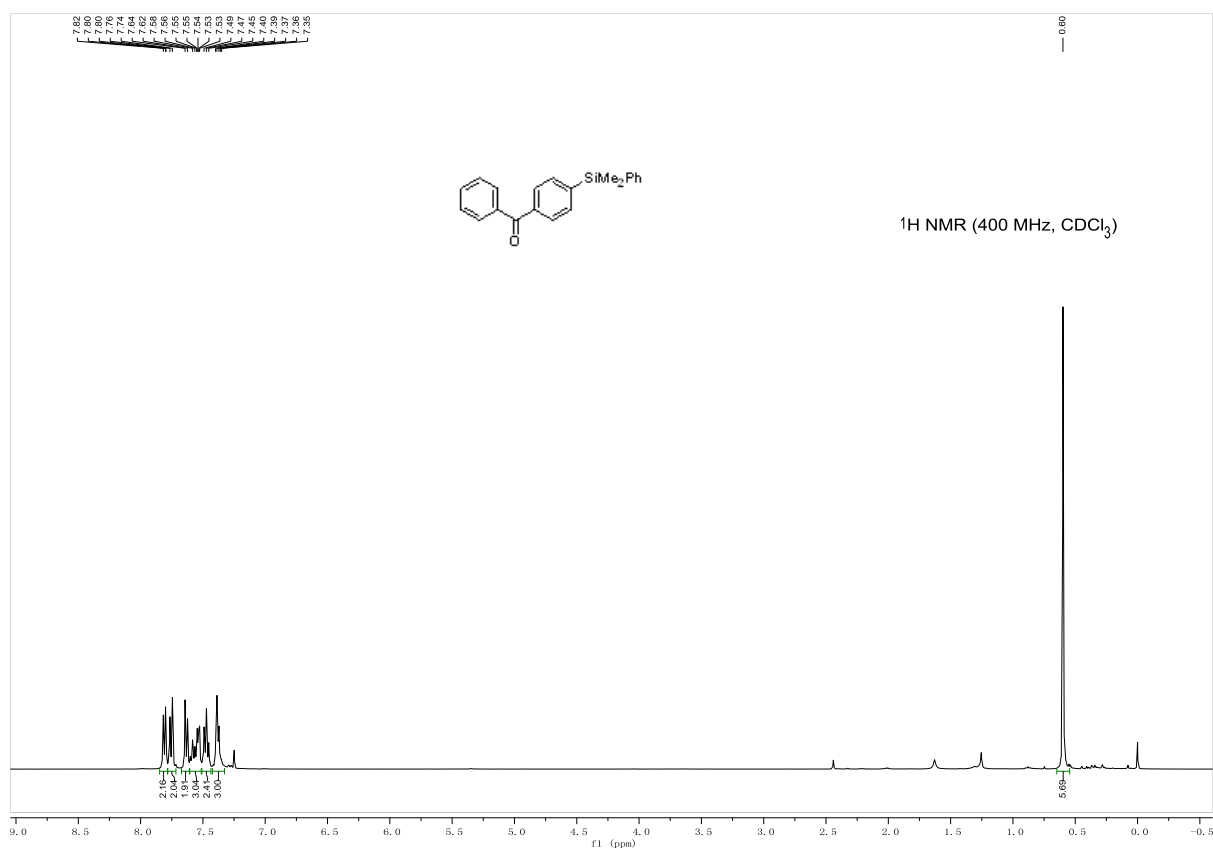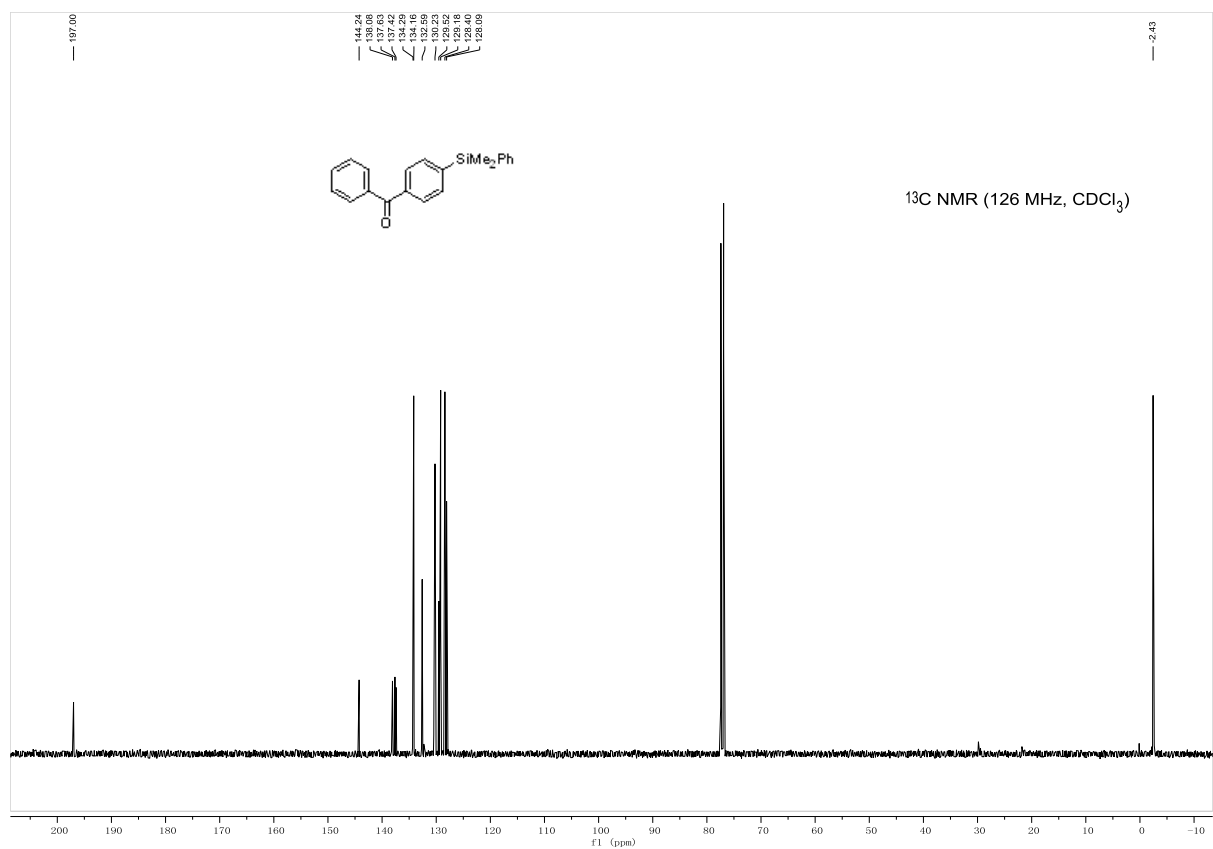

# 1-(4-(Dimethyl(phenyl)silyl)phenyl)ethan-1-one (**3n**)

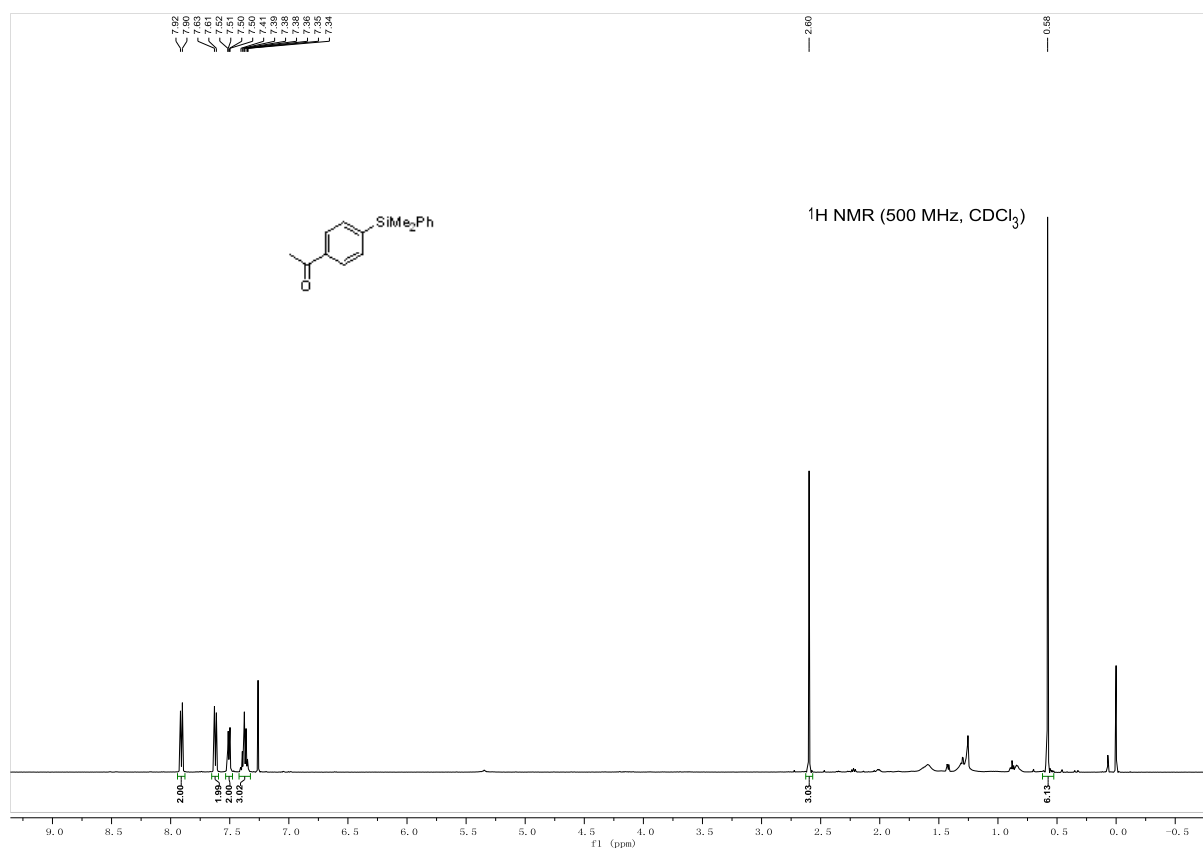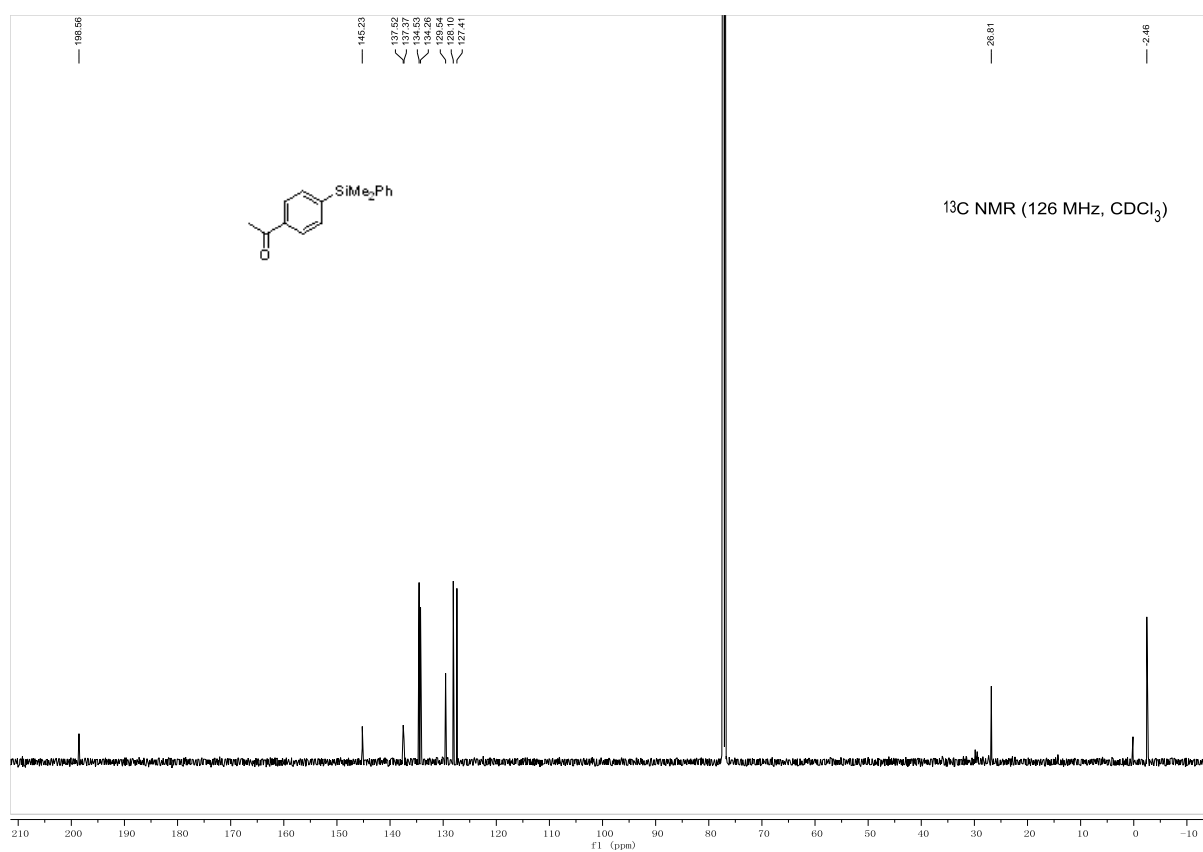

# Methyl 4-(dimethyl(phenyl)silyl)benzoate (**30**)

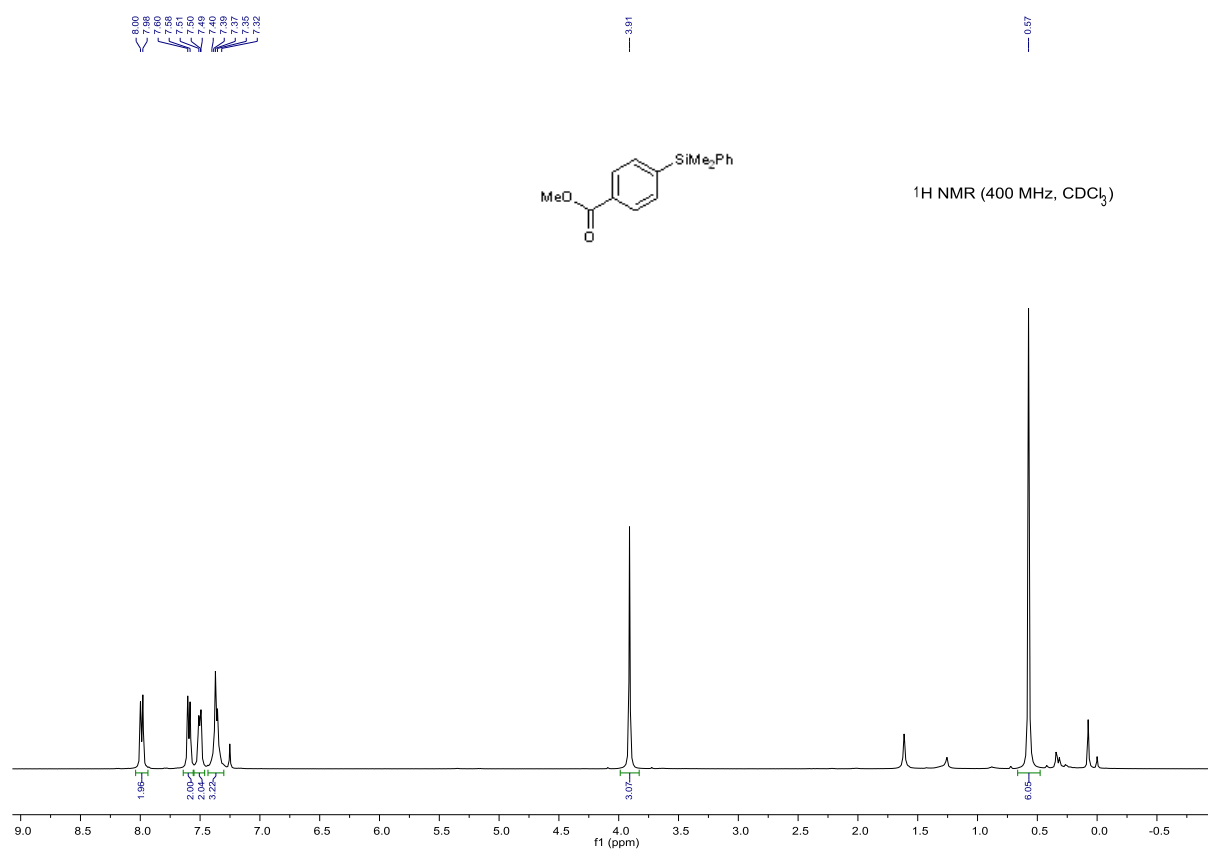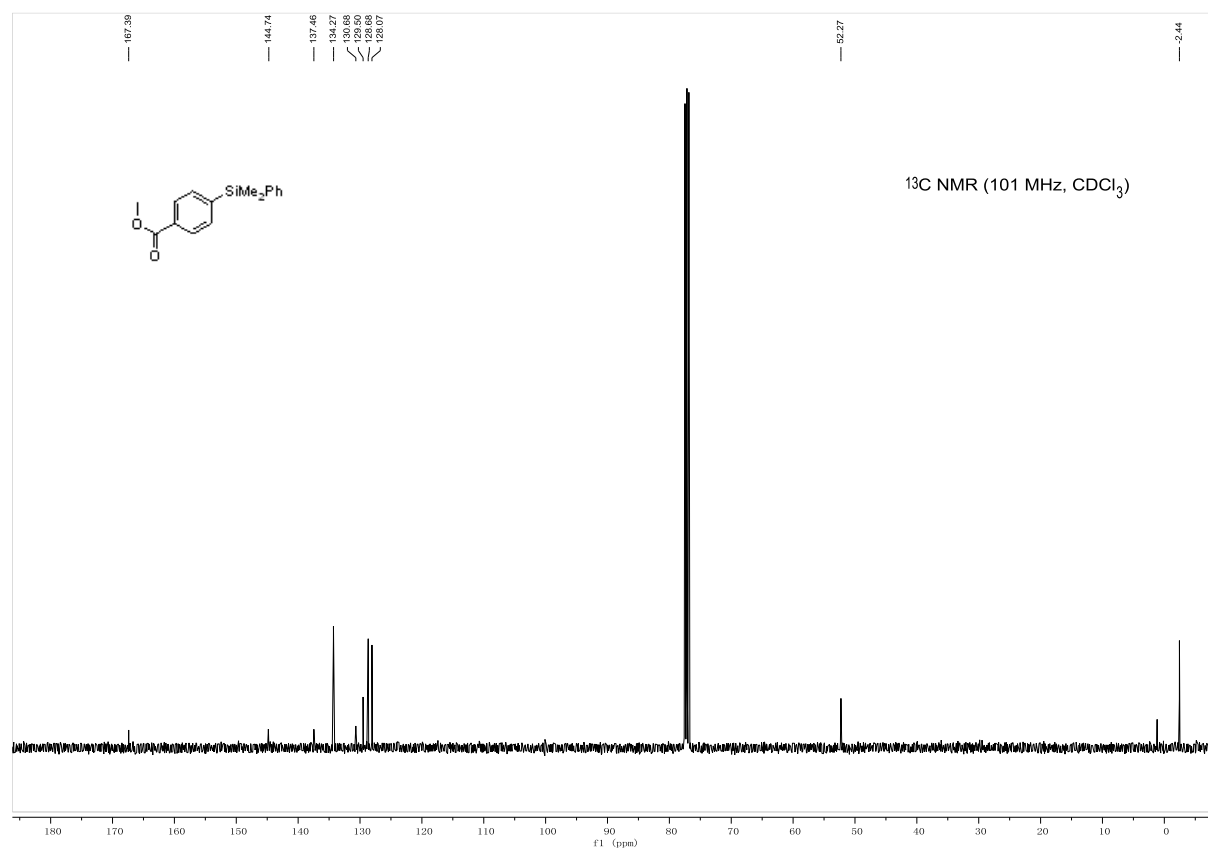

# Isopropyl 4-(dimethyl(phenyl)silyl)benzoate (**3p**)

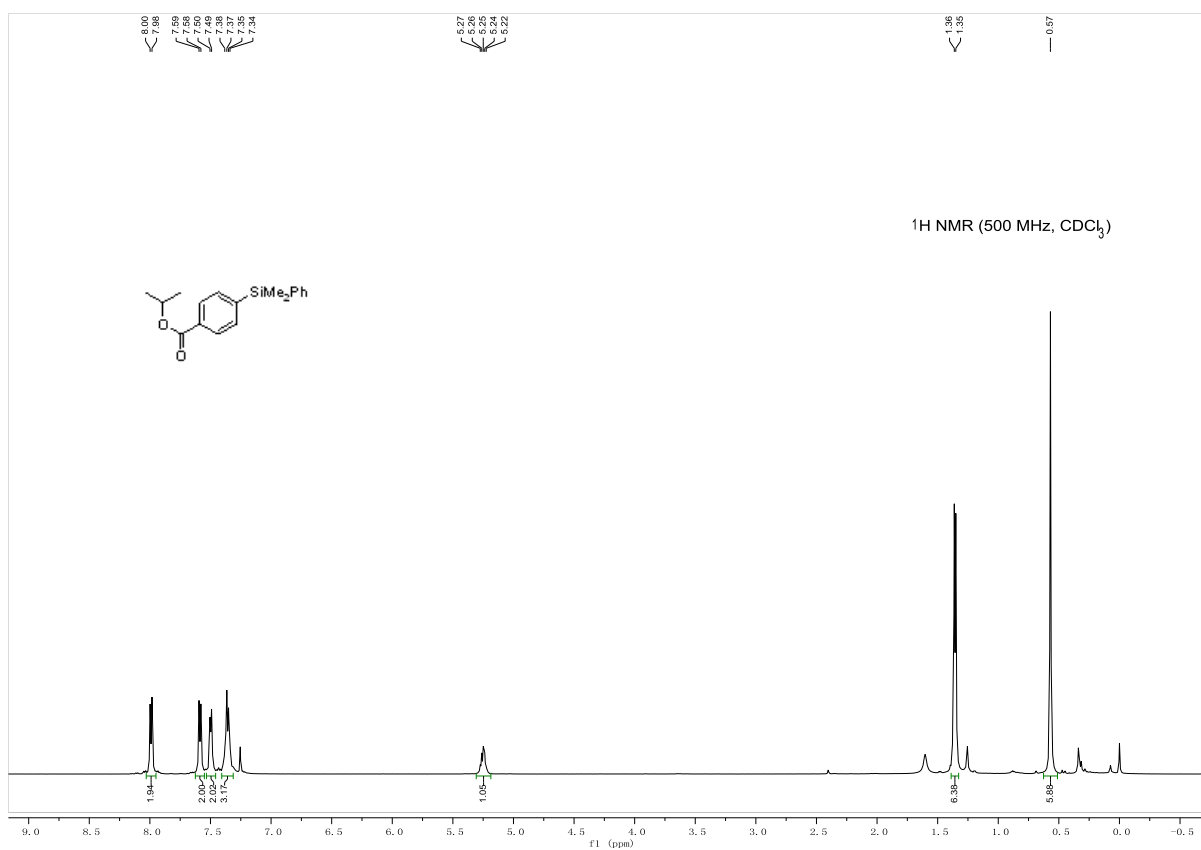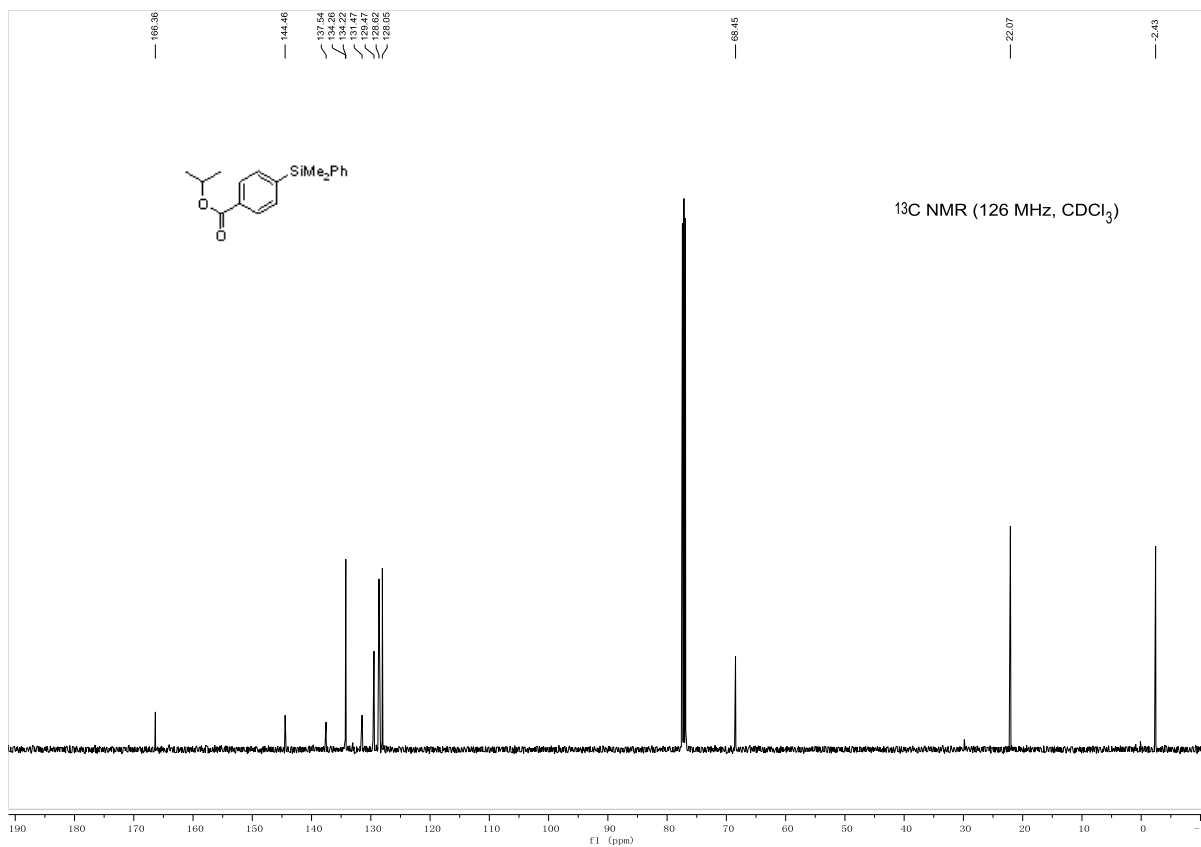

Methyl 2-(dimethyl(phenyl)silyl)benzoate (**3q**).

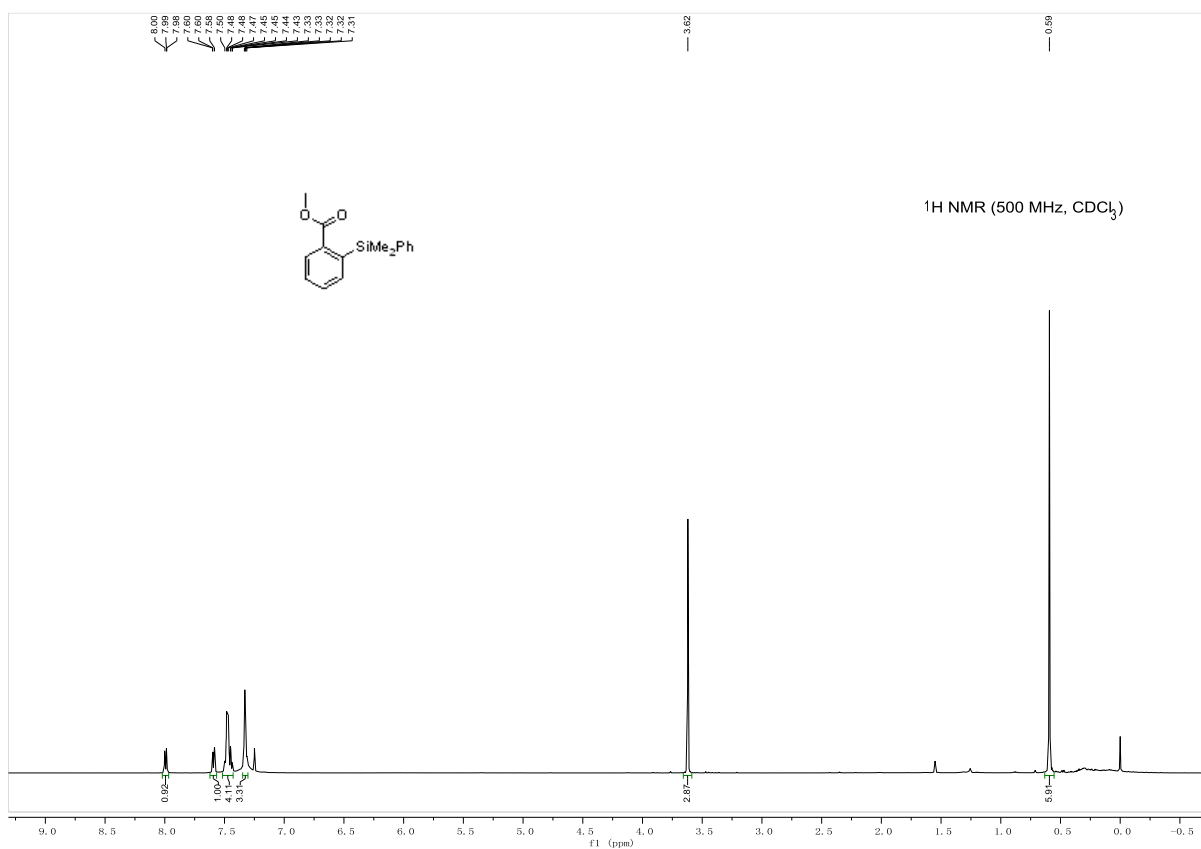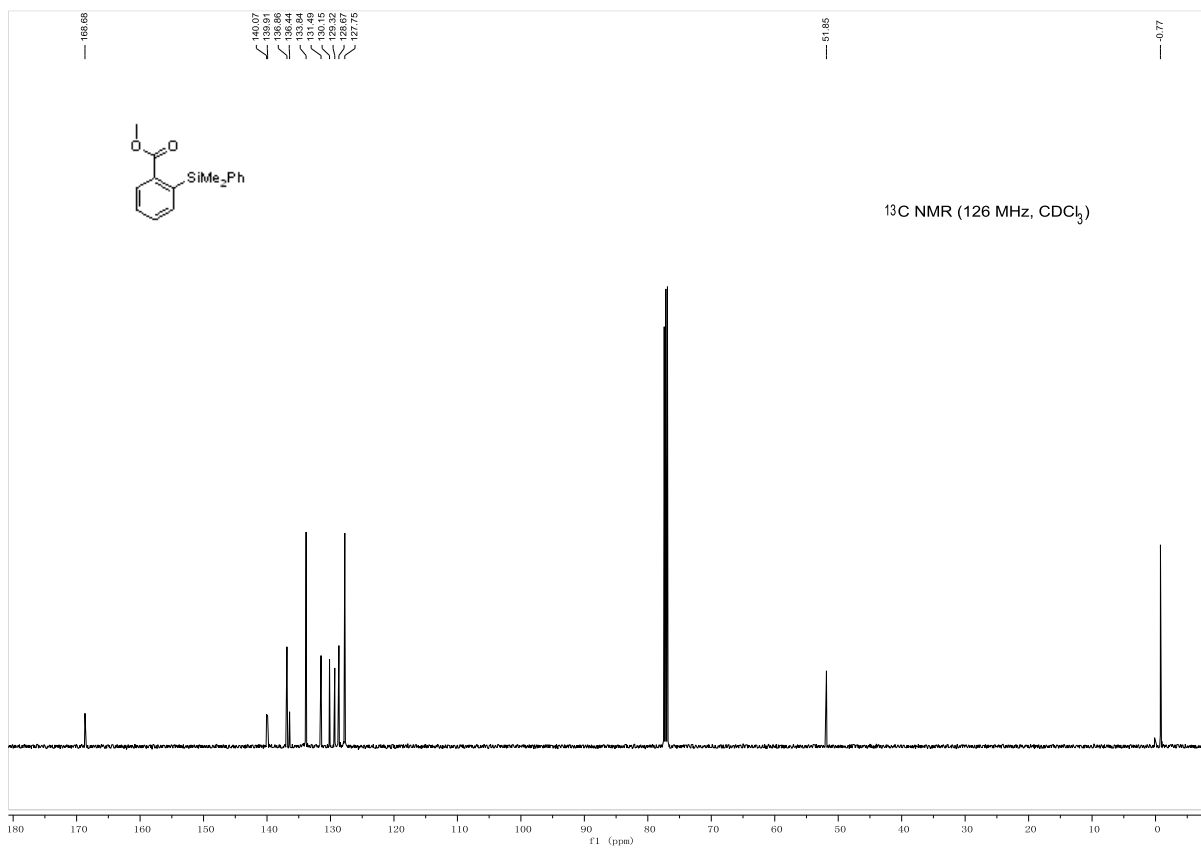

# 4-(Dimethyl(phenyl)silyl)-N,N-diethylbenzamide (**3r**)

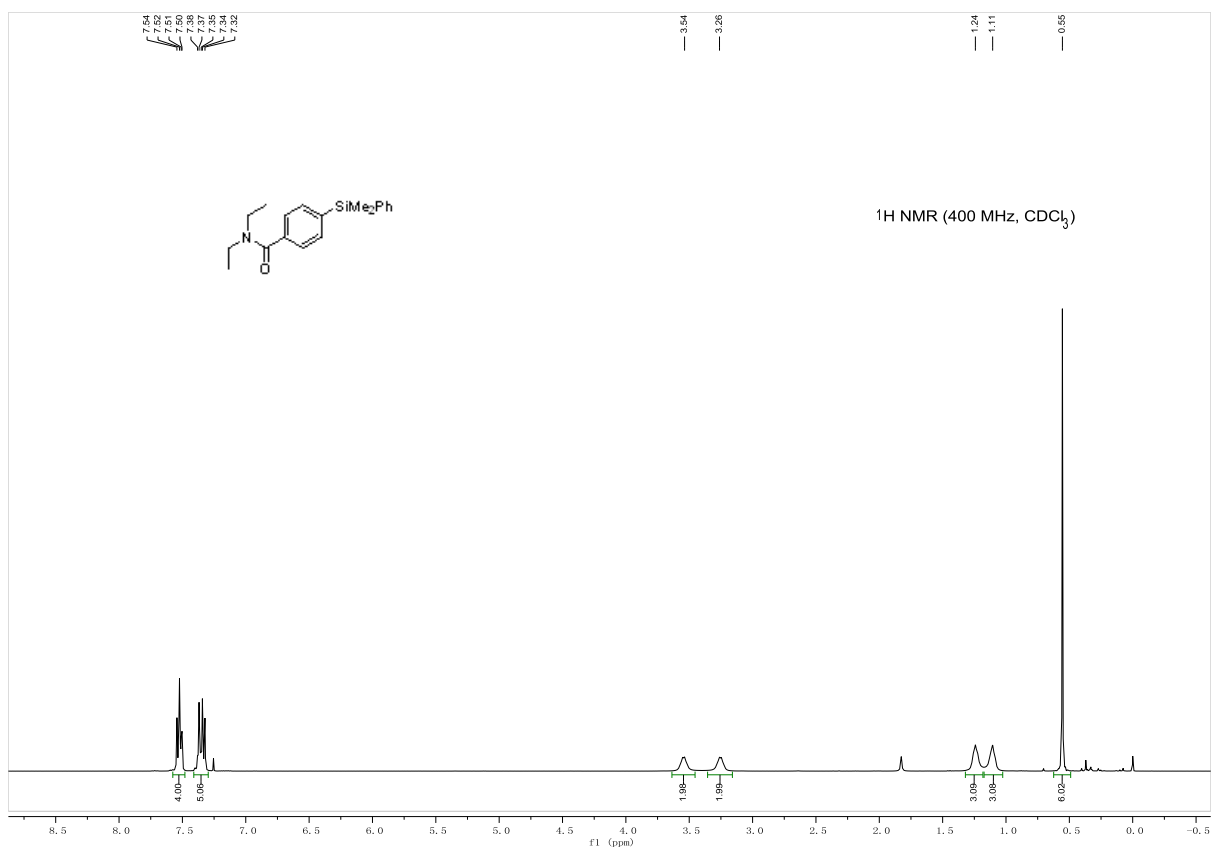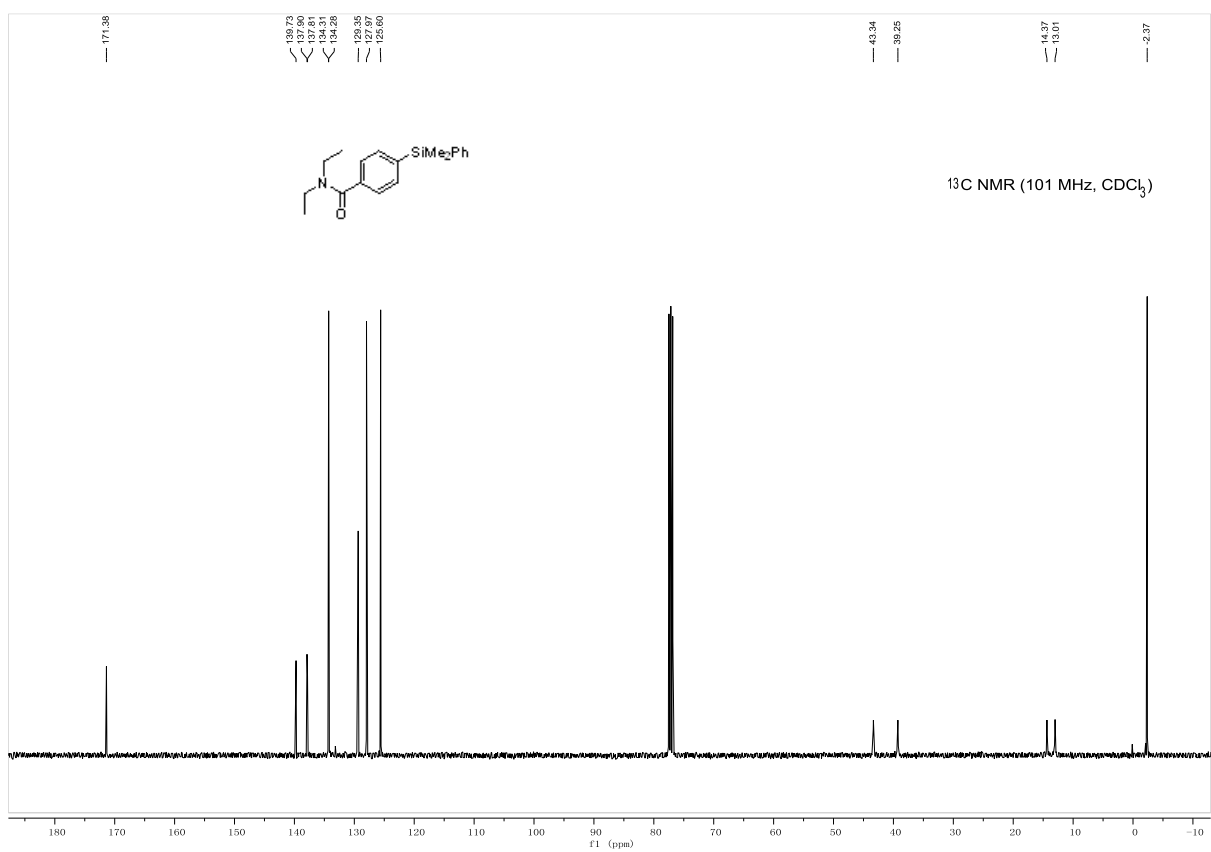

## 2-(Dimethyl(phenyl)silyl)pyridine (3s)

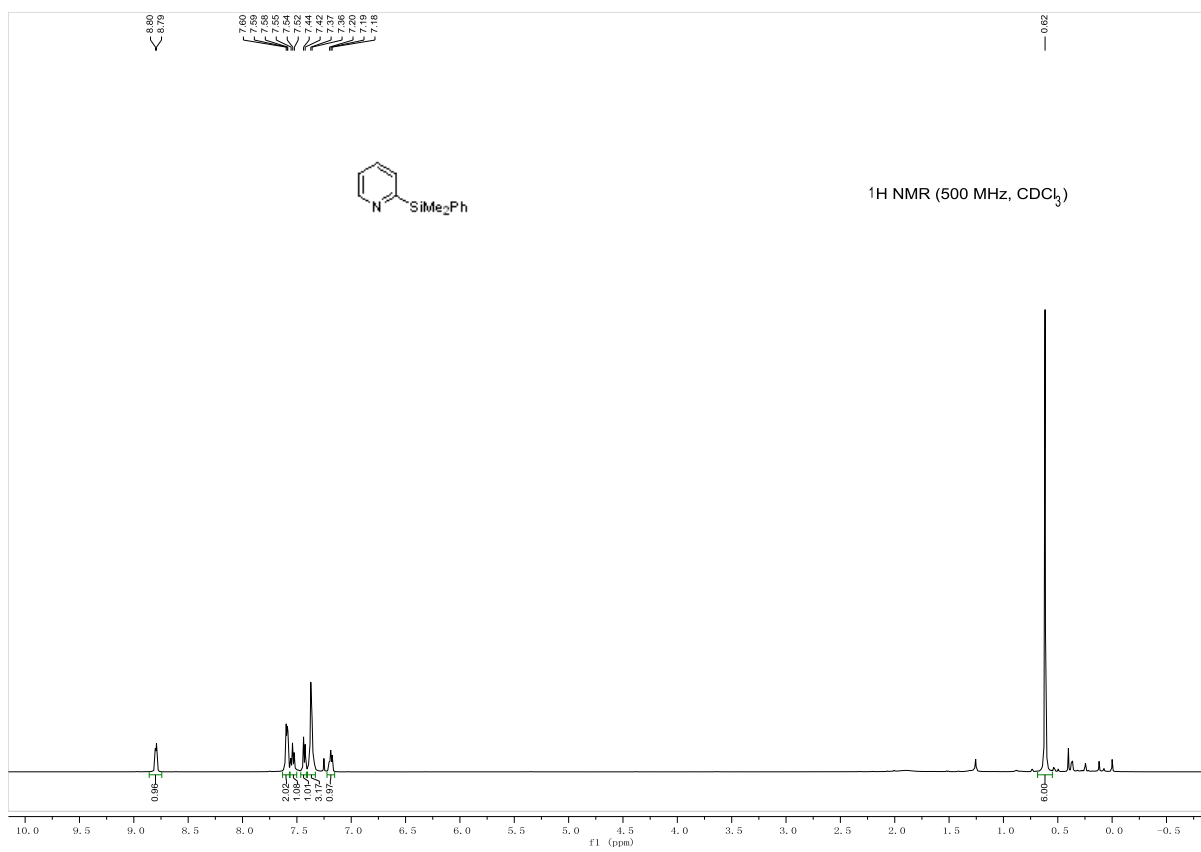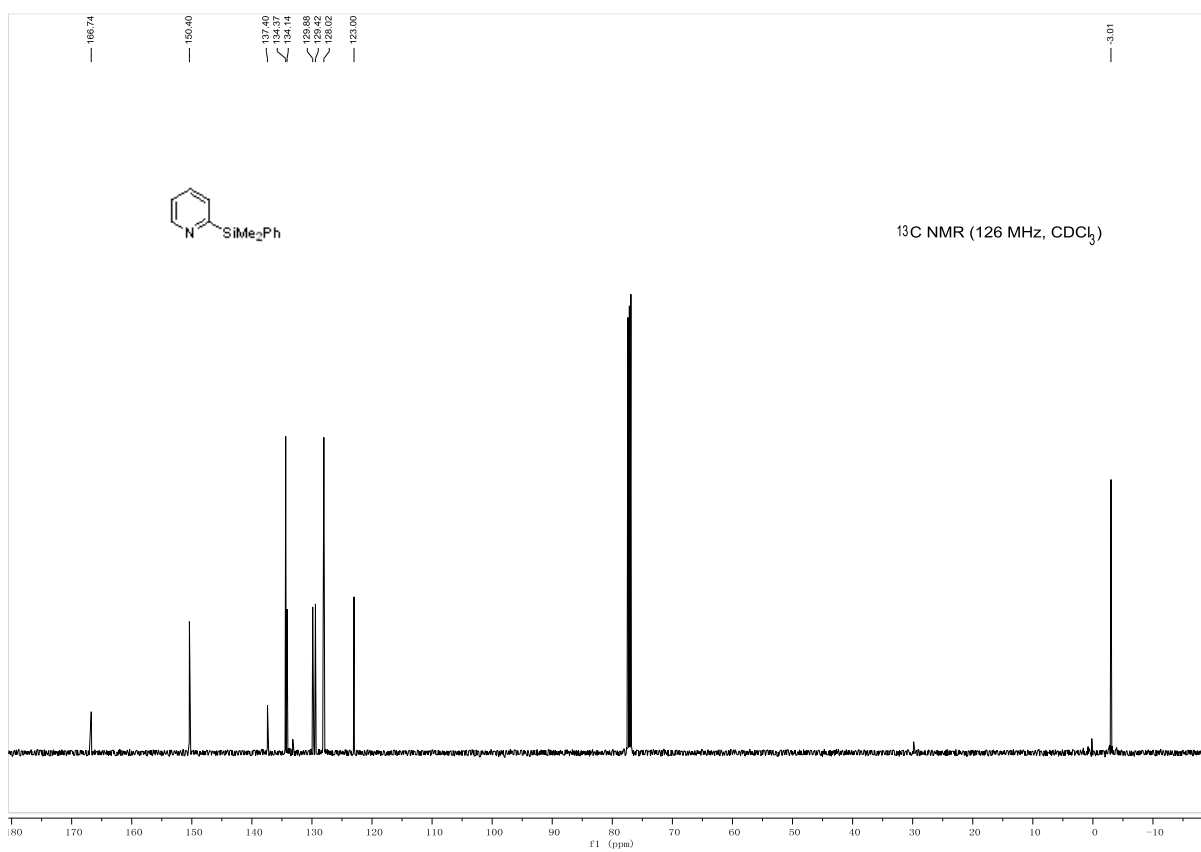



# 2-(Dimethyl(phenyl)silyl)-4-(trifluoromethyl)pyridine (3t)

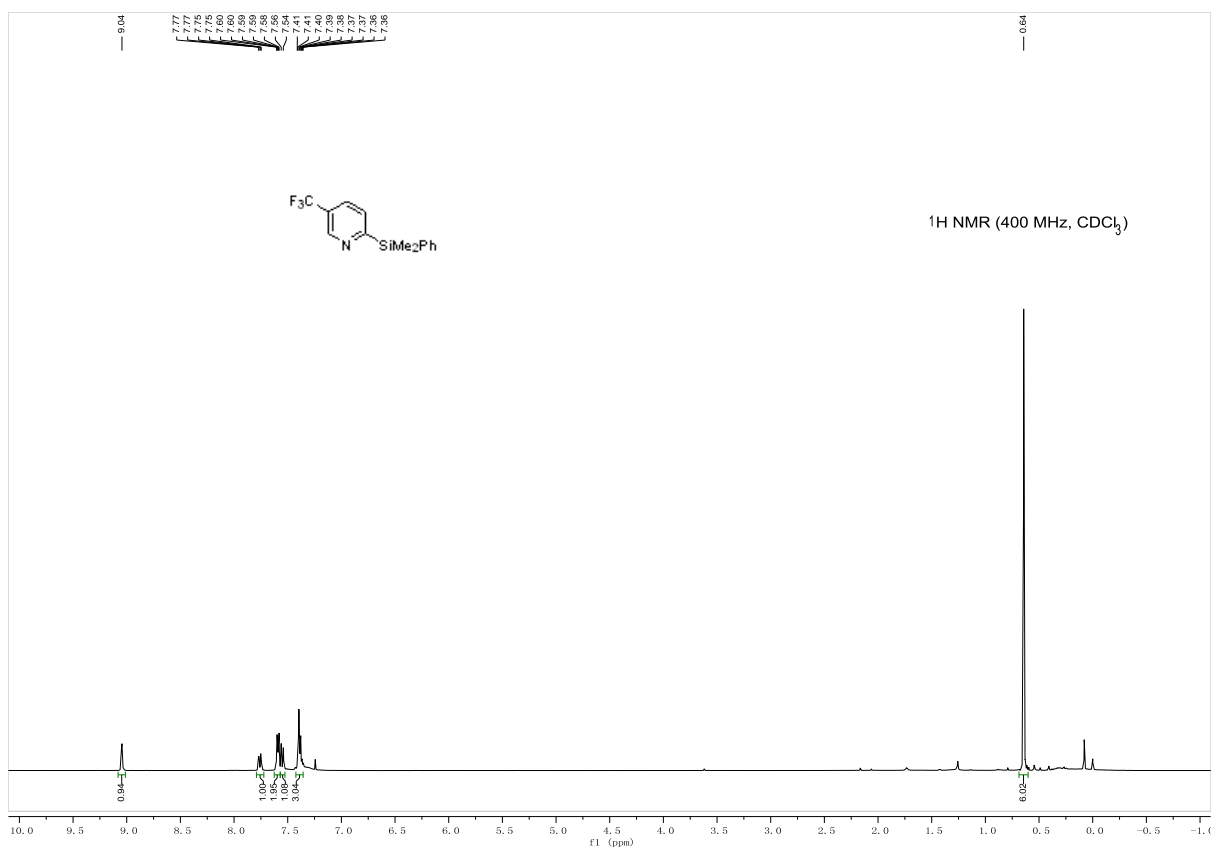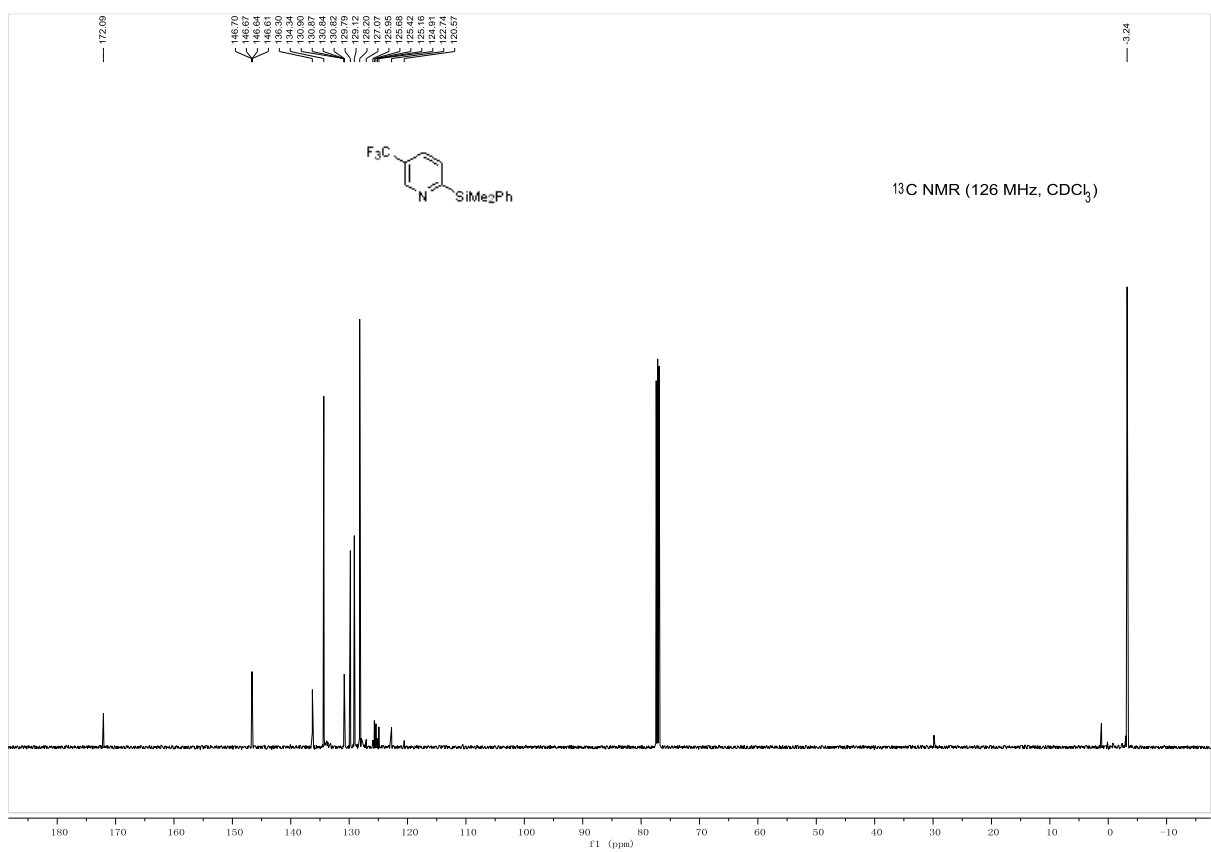

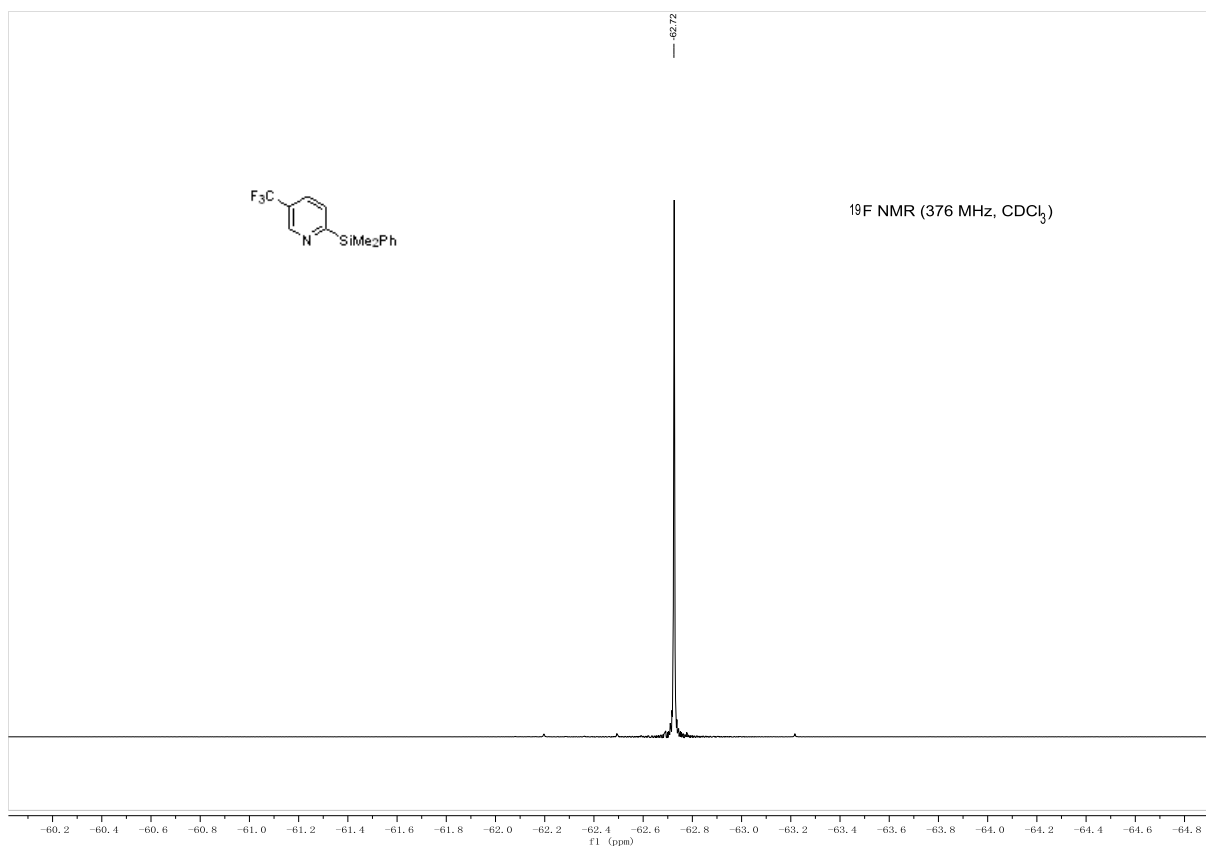

# Benzo[b]thiophen-2-yl dimethyl(phenyl)silane (**3u**)

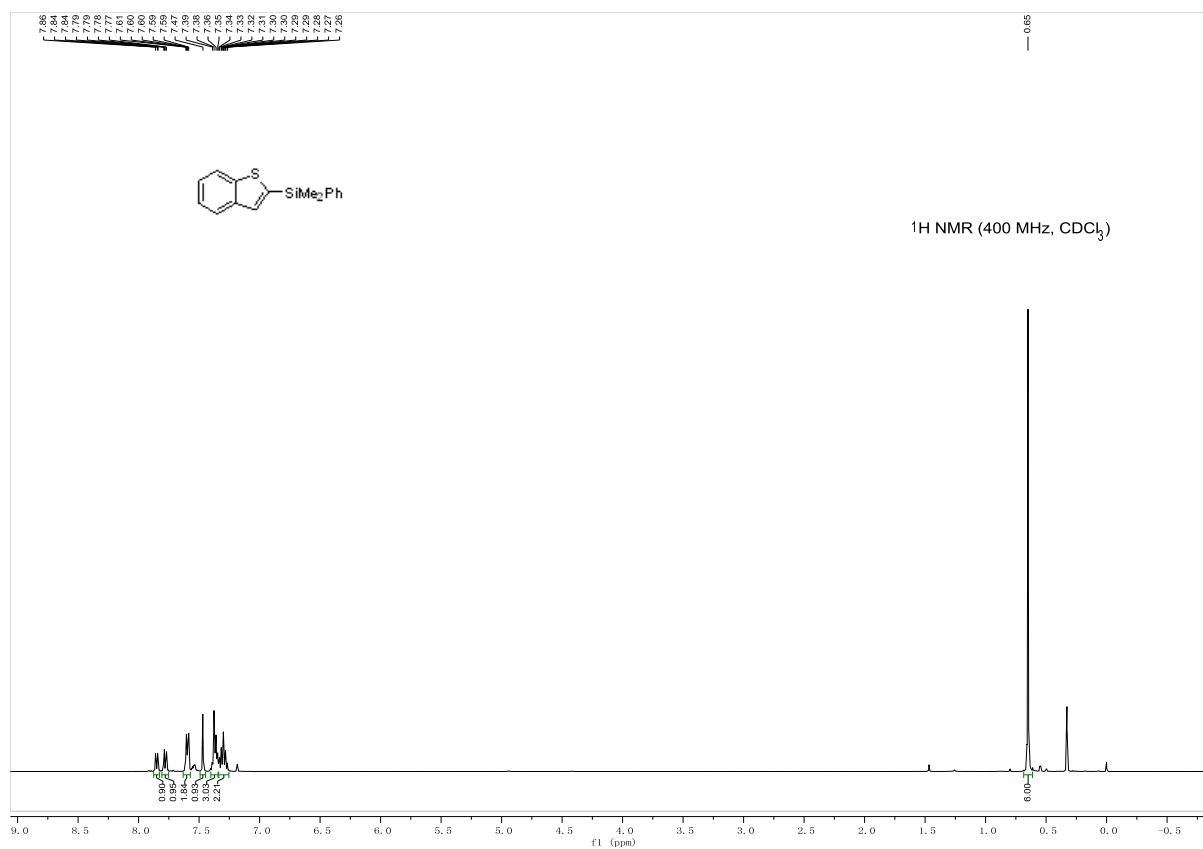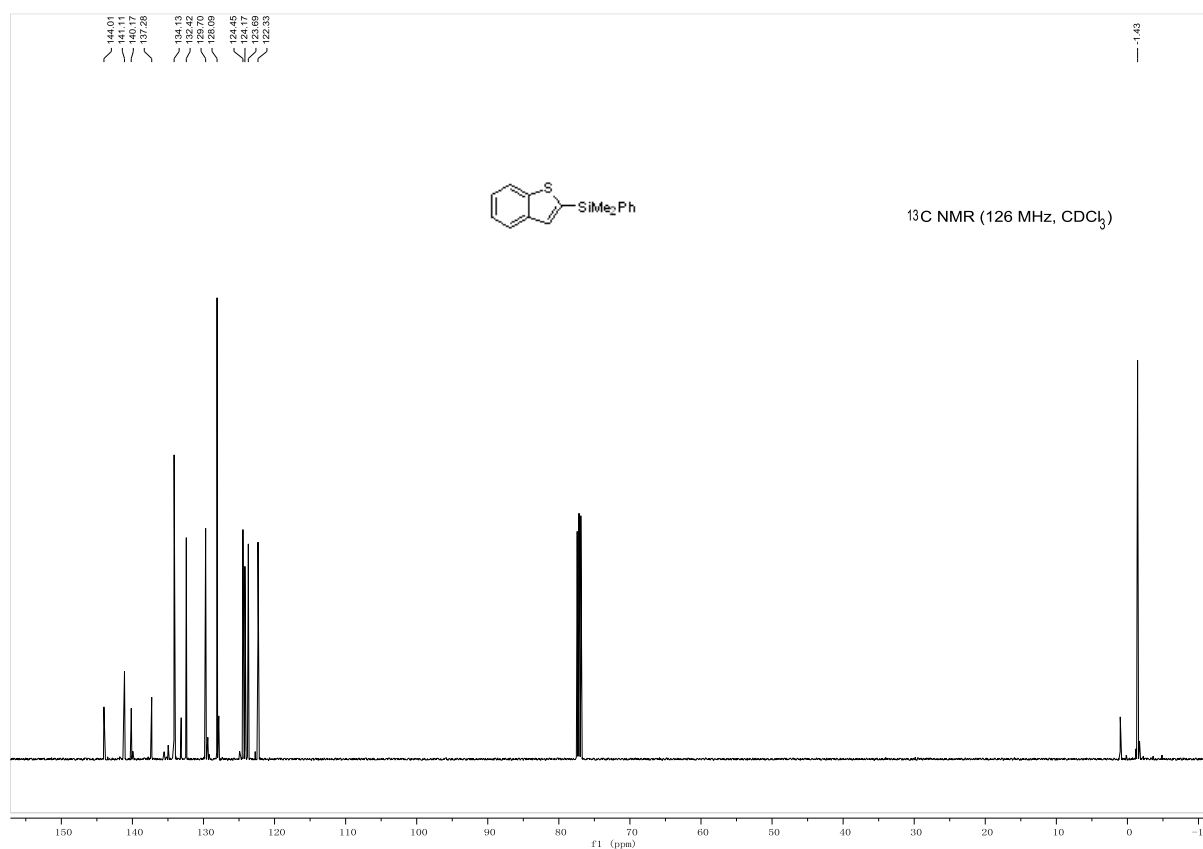

# Benzofuran-2-yl dimethyl(phenyl)silane (**3v**)

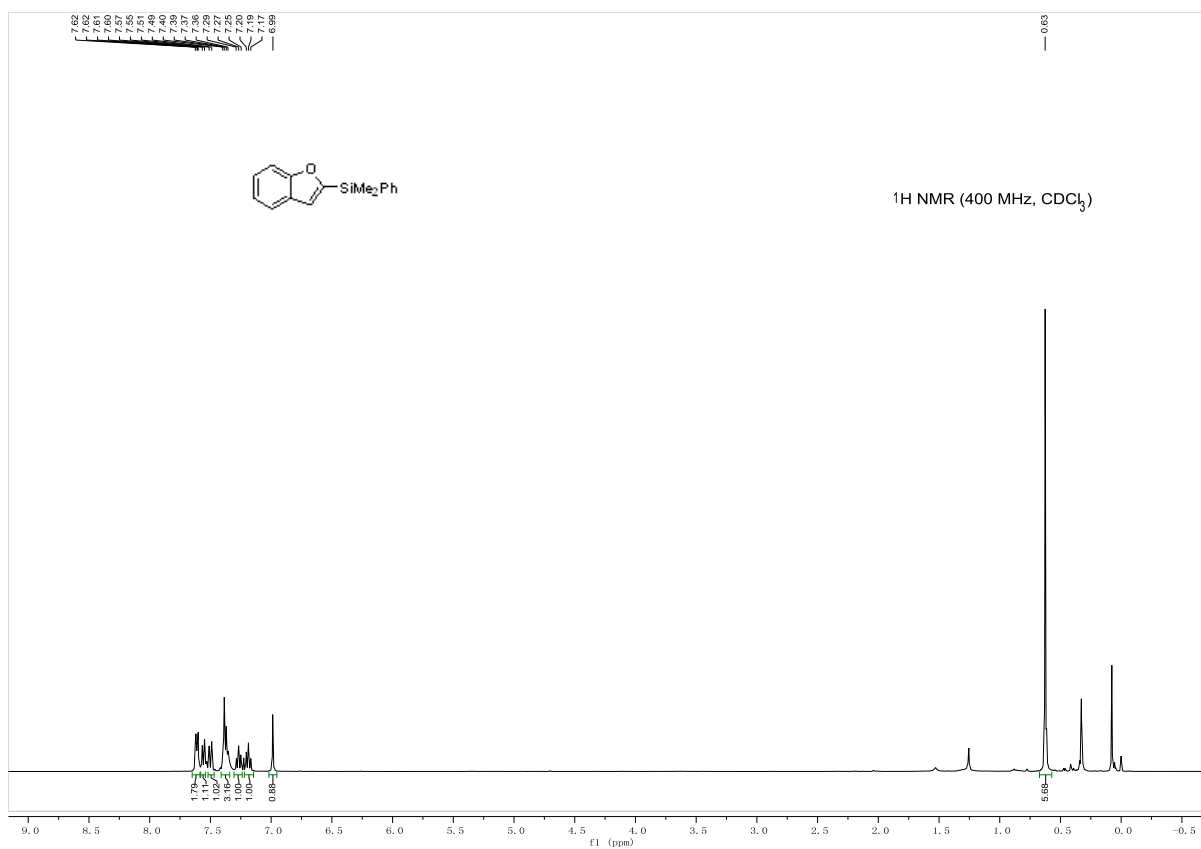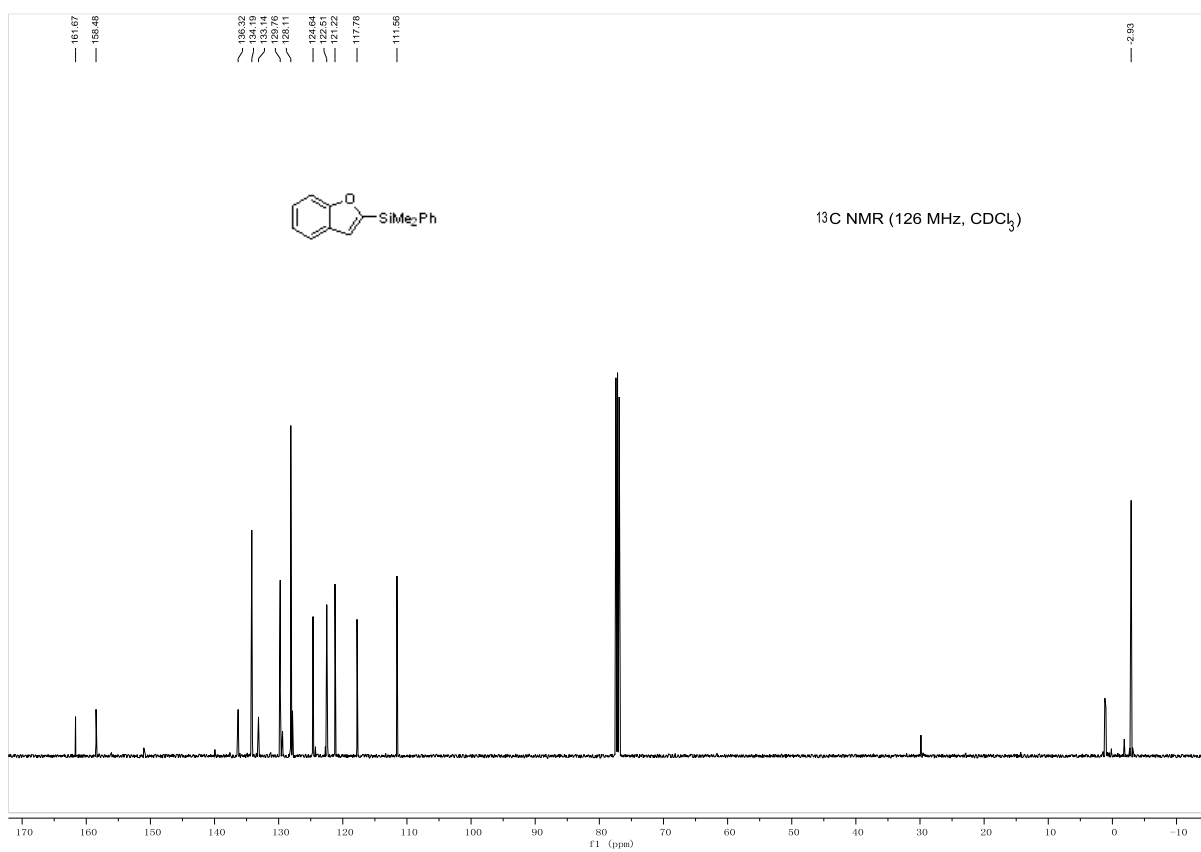

# (4-Methoxyphenyl)(methyl)diphenylsilane (**4a**)

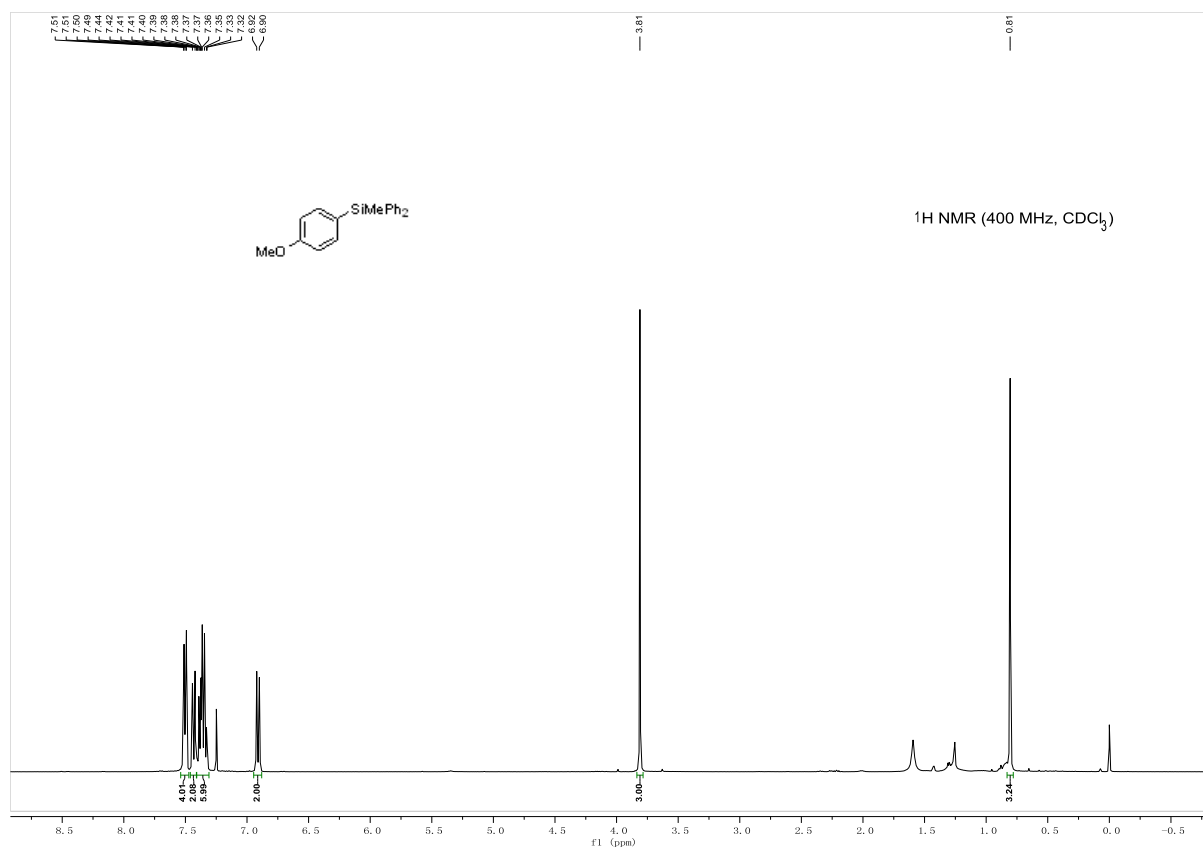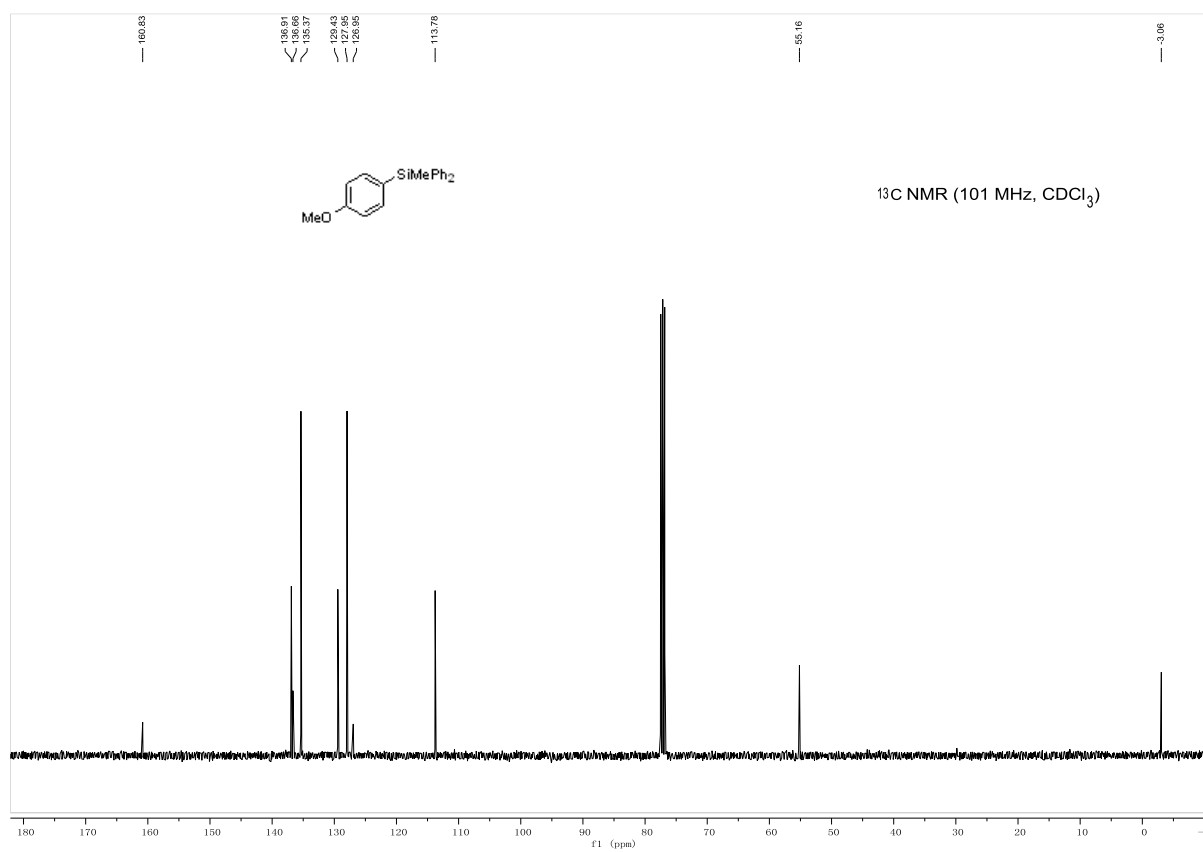

# Isopropyl 4-(methyldiphenylsilyl)benzoate (**4b**)

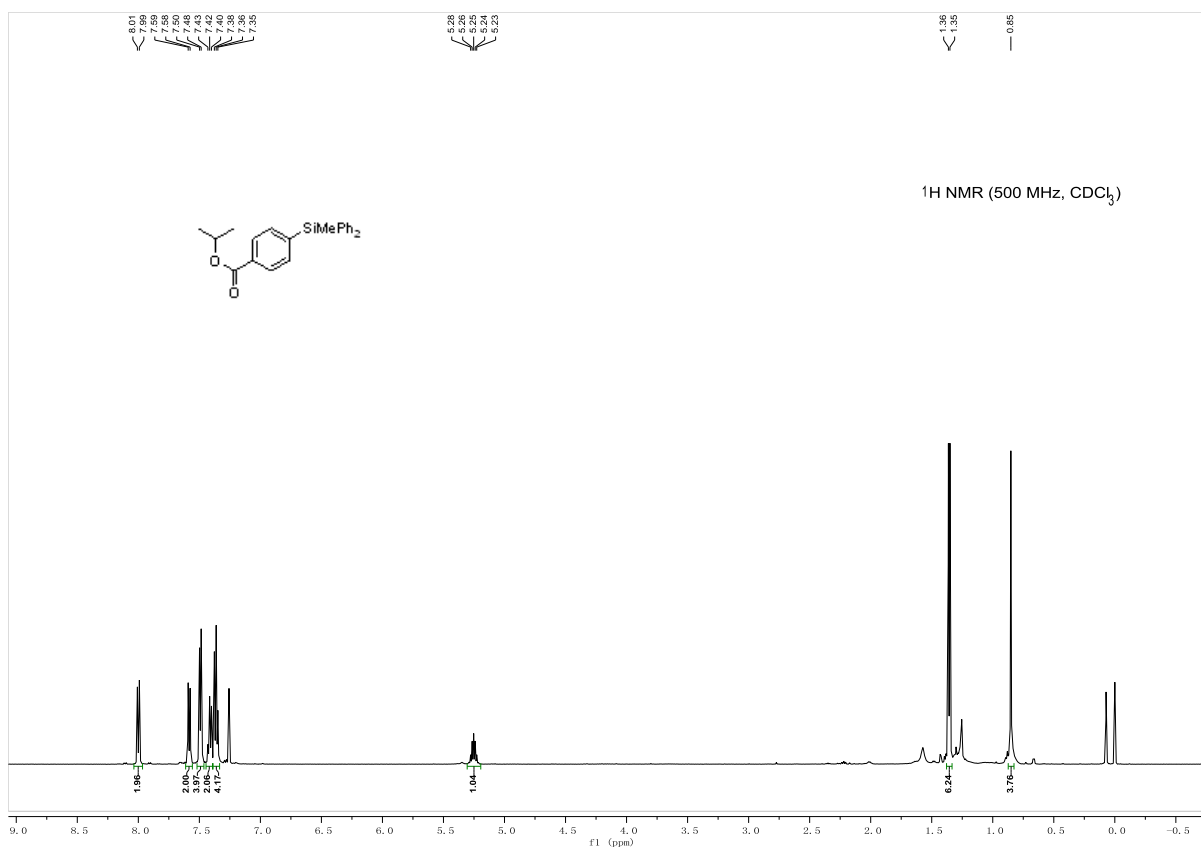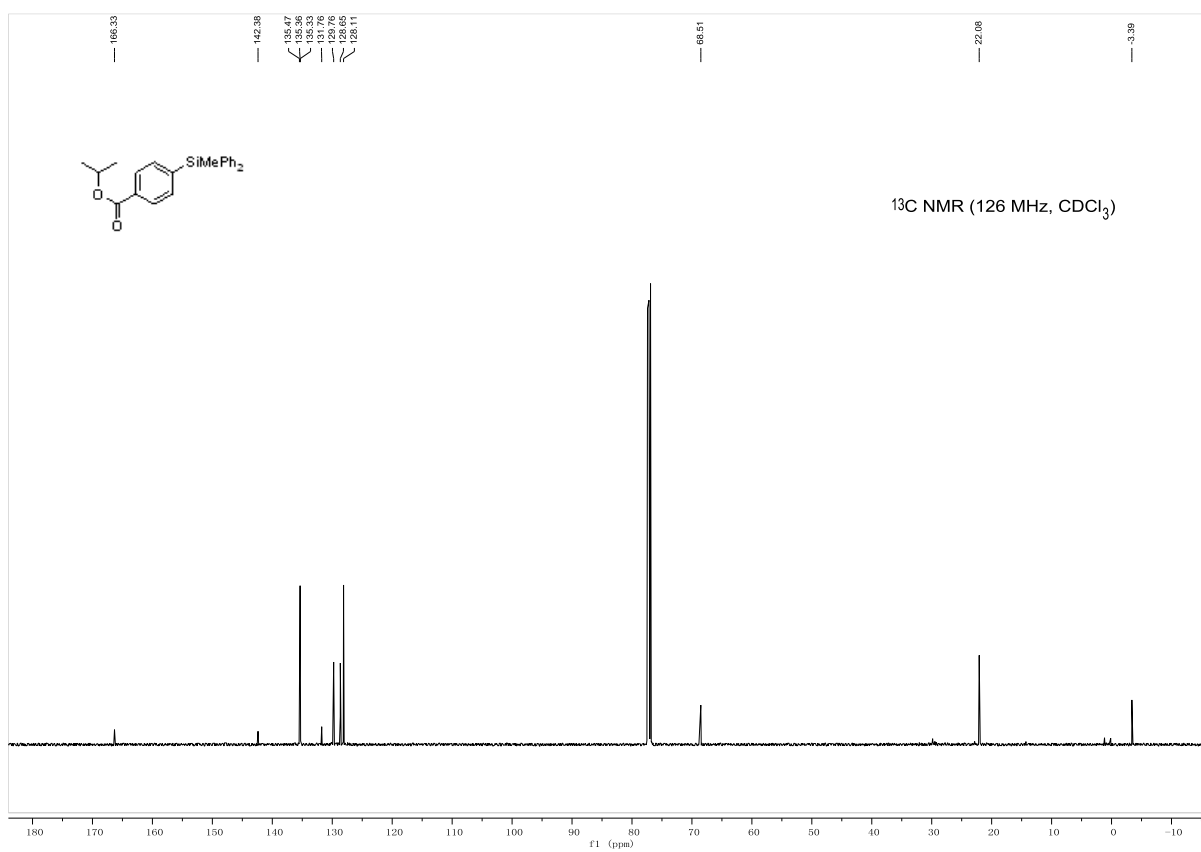

# [1,1'-Biphenyl]-3-yl(methyl)diphenylsilane (**4c**)

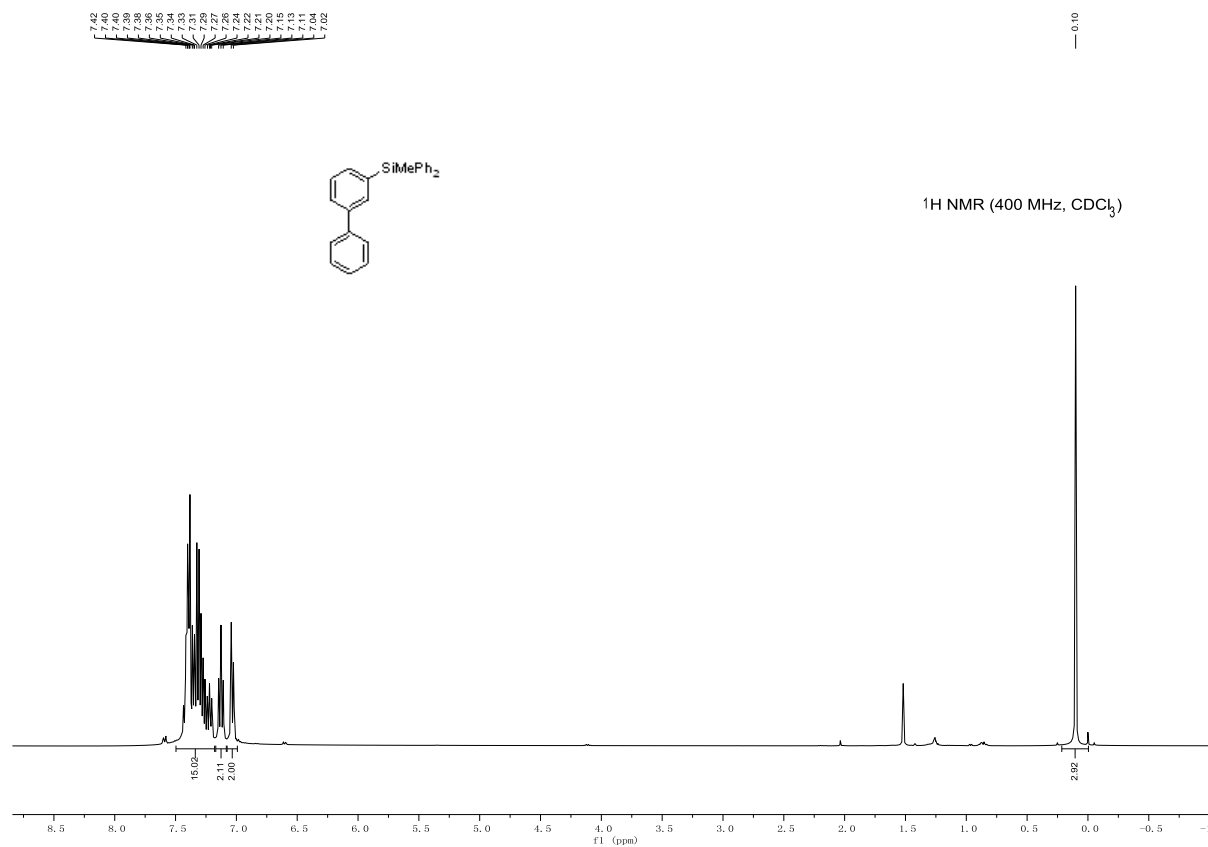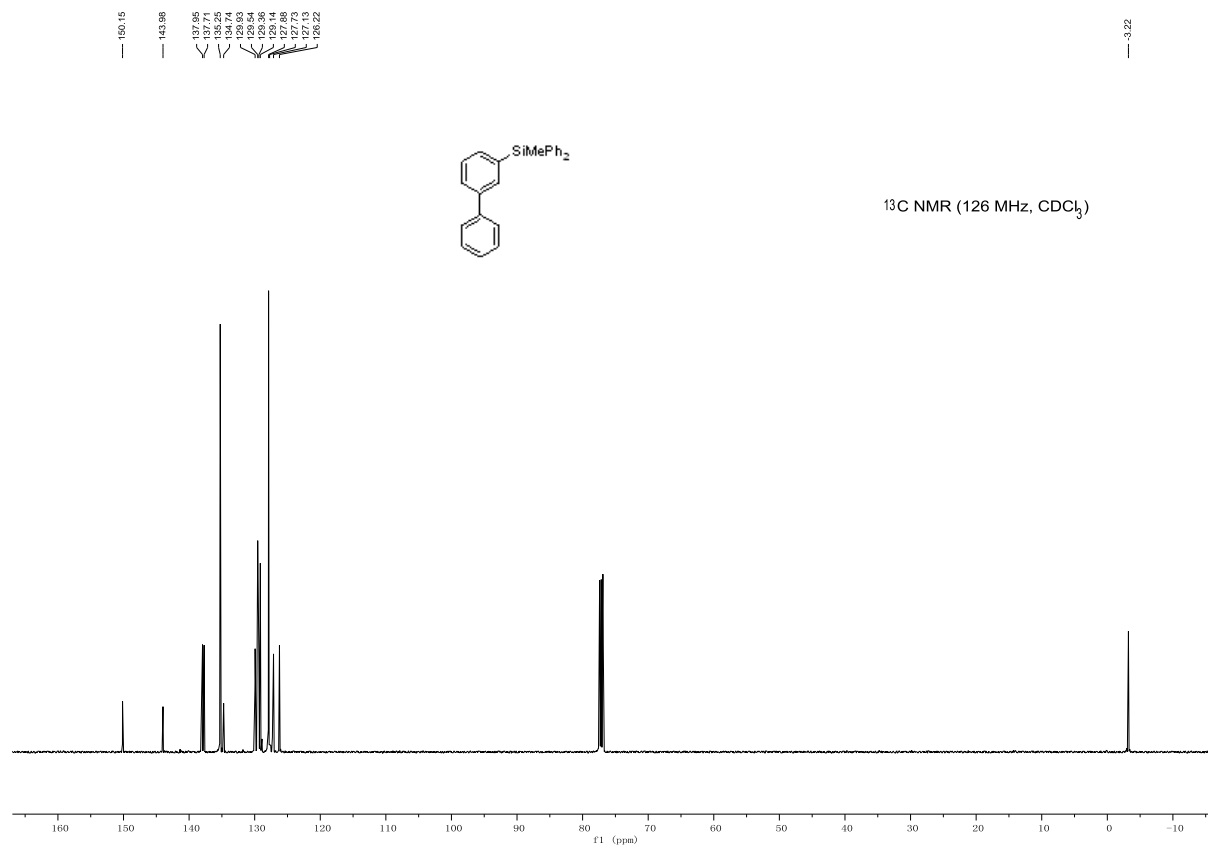

# Methyl(naphthalen-2-yl)diphenylsilane (**4d**)

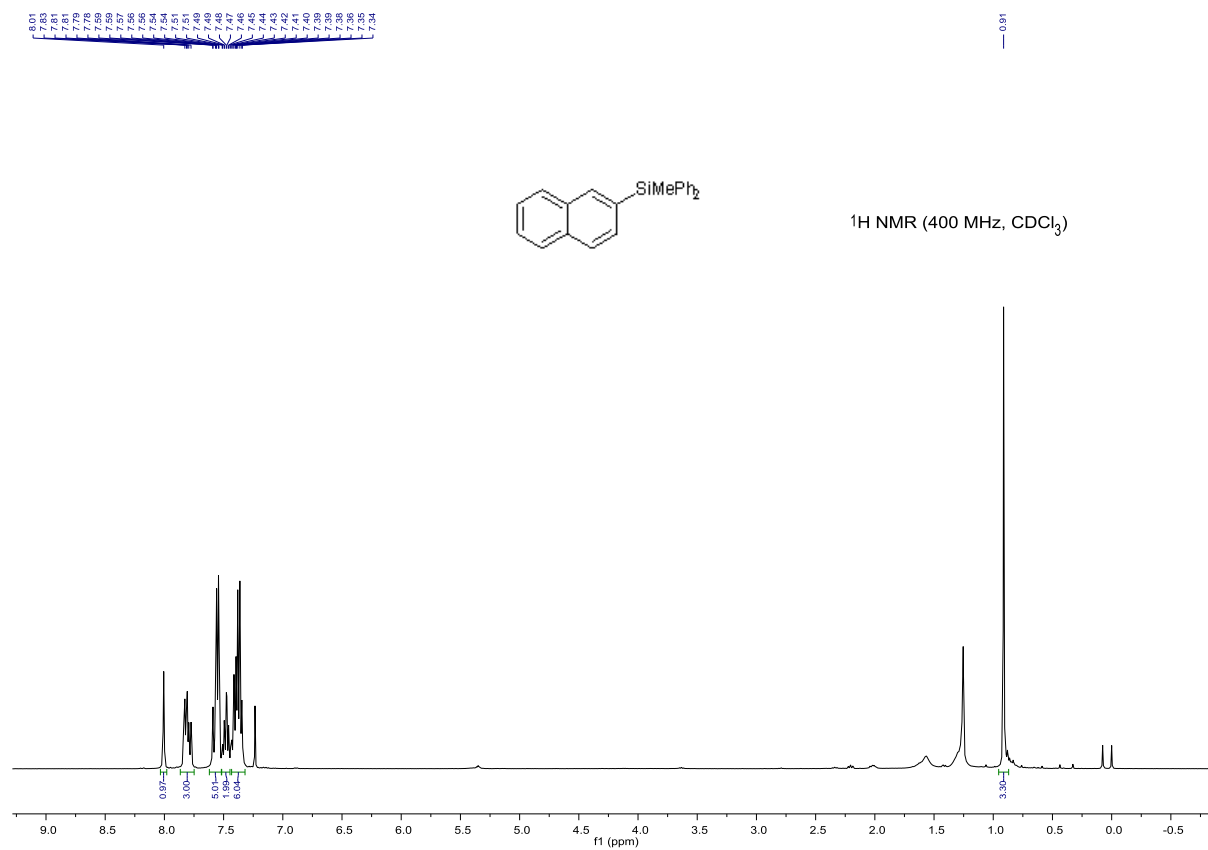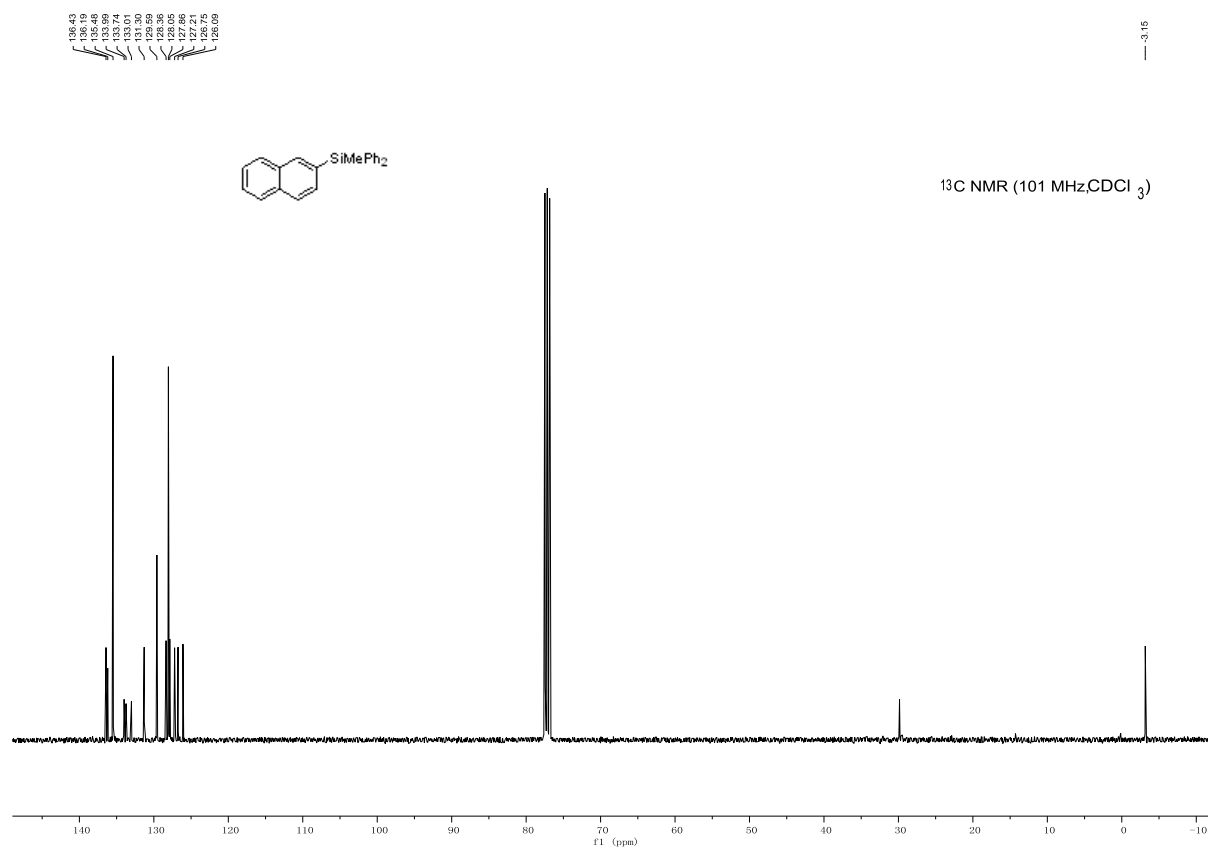



## 2-(Methyldiphenylsilyl)pyridine (**4e**)

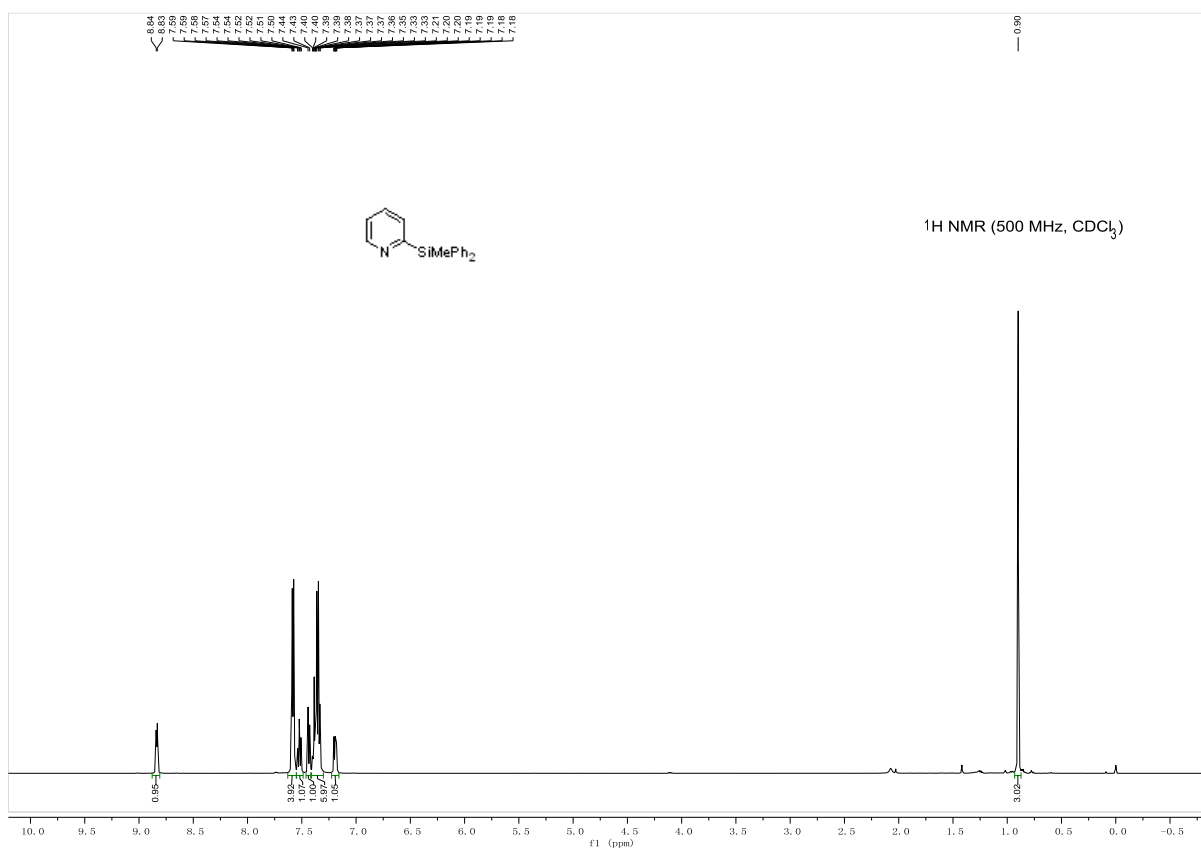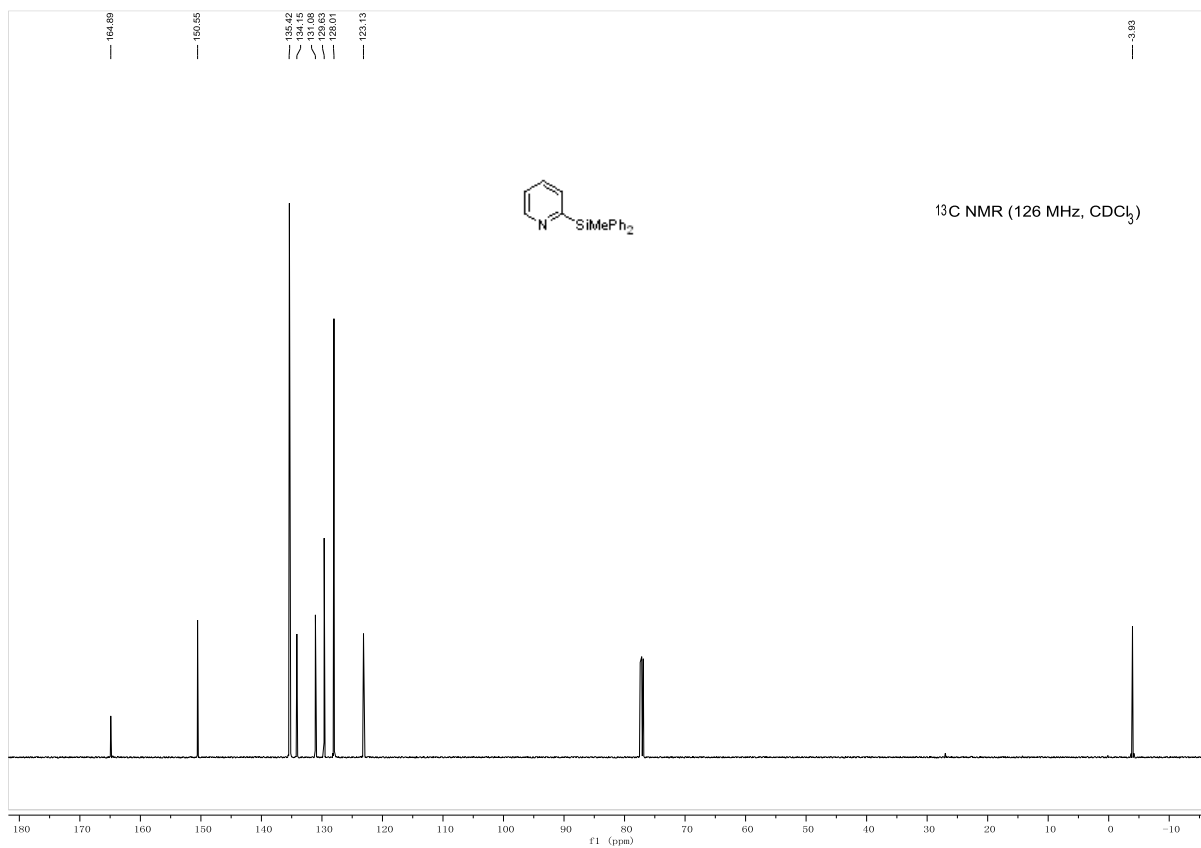

# Isopropyl 4-(triphenylsilyl)benzoate (**5a**)

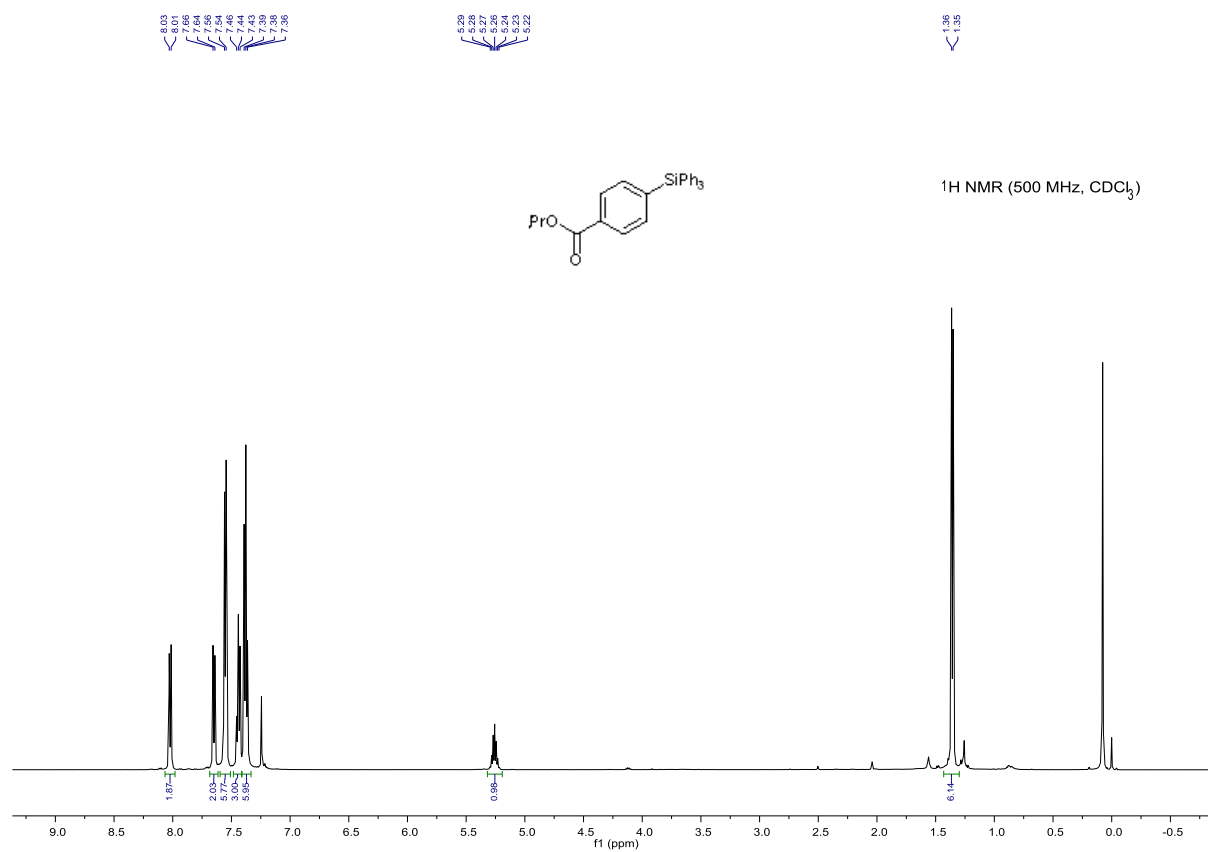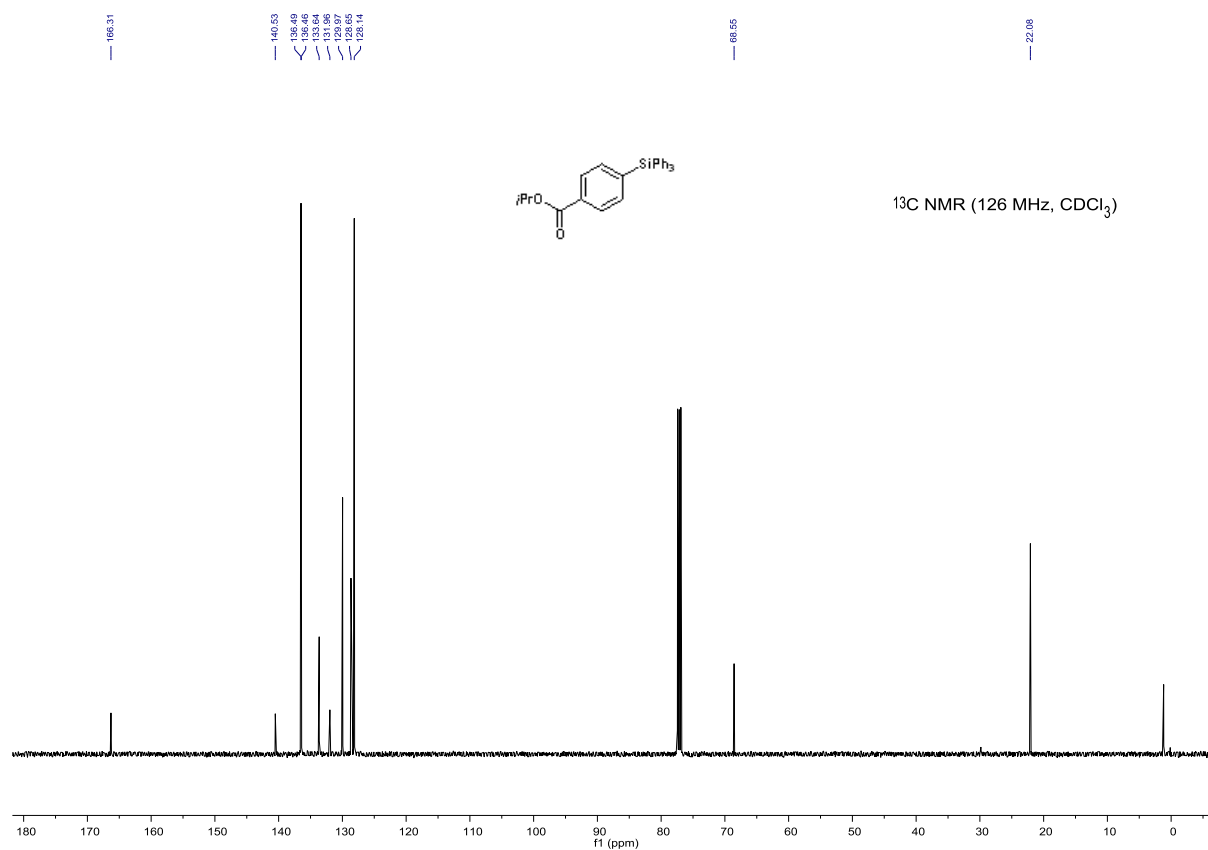

## 2-(Triphenylsilyl)pyridine (**5b**)

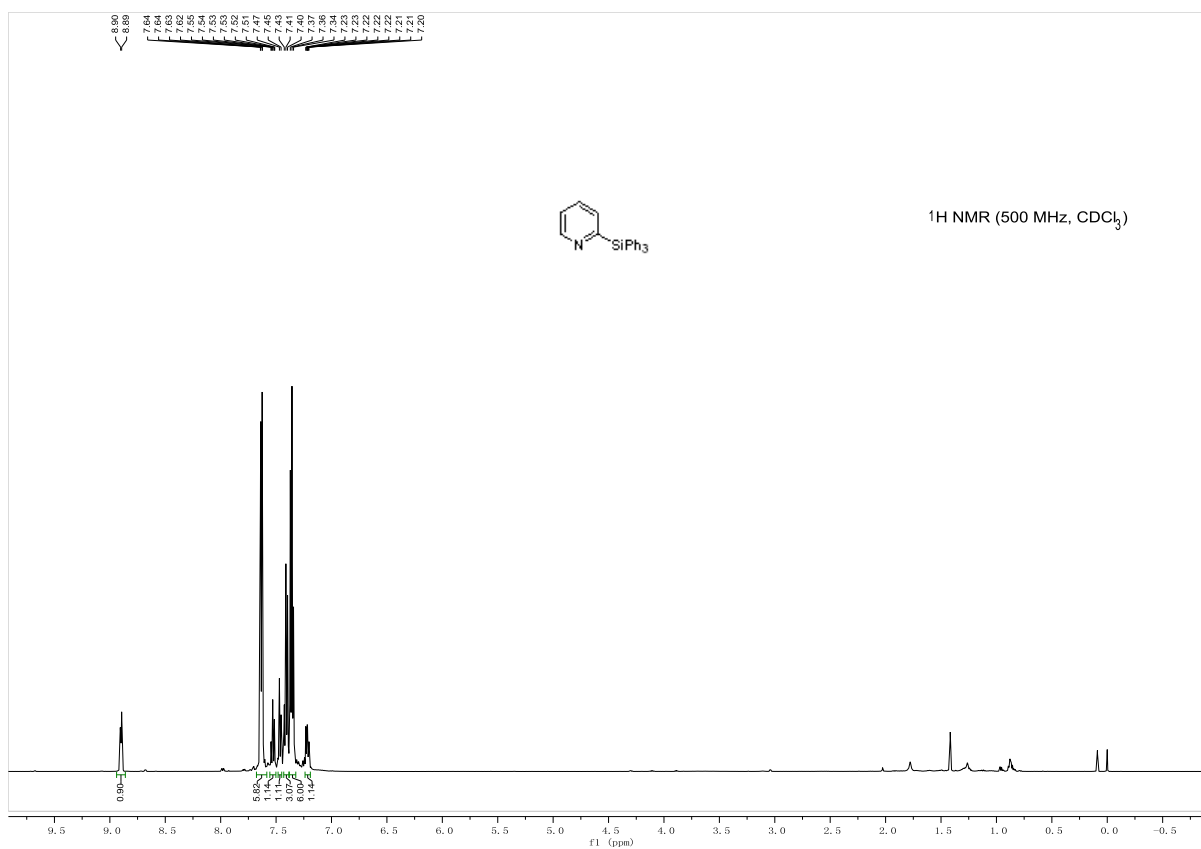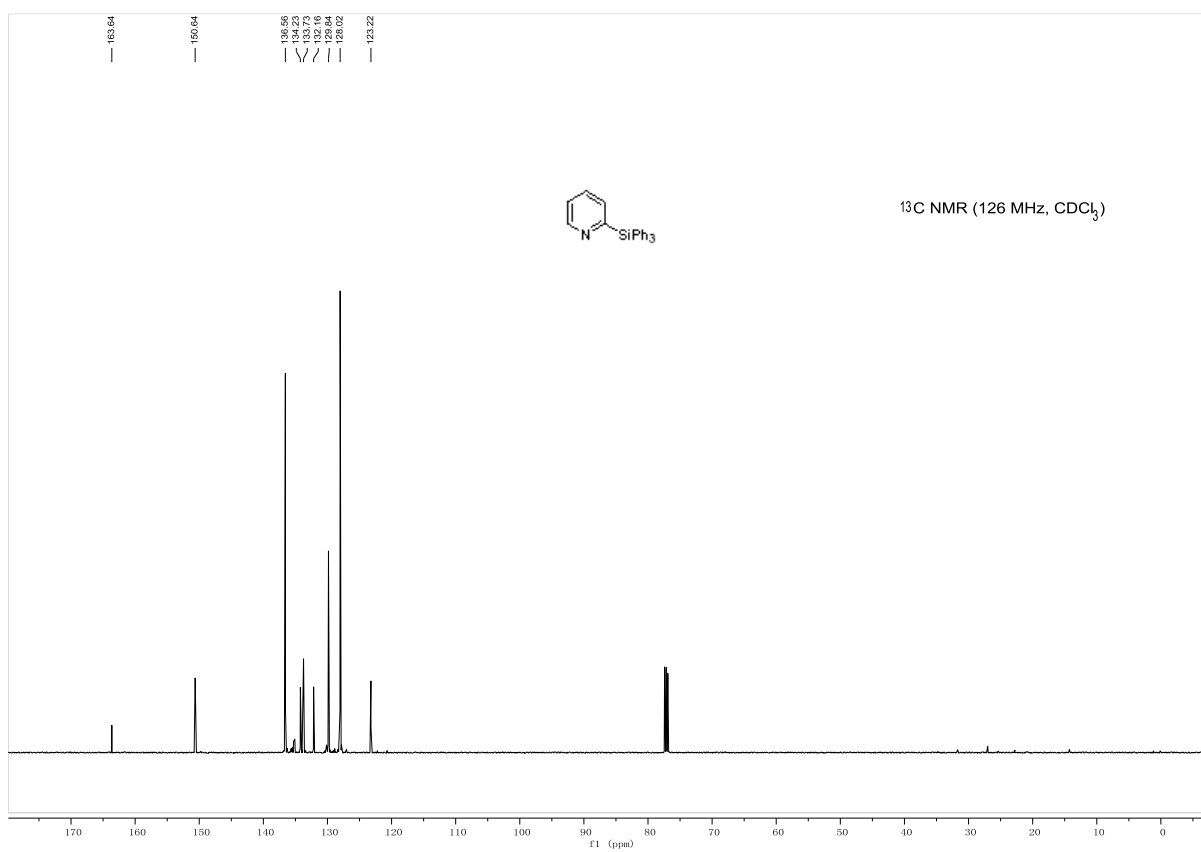

Supplement: d1ob00840d1.pdf [file d1ob00840d1.pdf]
